# Supplementary material for: A novel electromagnetic mill promoted mechanochemical solid-state Suzuki–Miyaura cross-coupling reaction using ultra-low catalyst loading
Source: Royal Society of Chemistry journal article supplement (doi:10.1039/d2gc01427k), 2022-01-01

## Supporting Information

### A Novel Electromagnetic Mill Promoted Mechanochemical Solid-State Suzuki–Miyaura Cross-Coupling Reactions Using Ultra-Low Catalyst Loading

Xin Li<sup>†a</sup>, Yunxia Liu<sup>†a</sup>, Lizhi Zhang<sup>a</sup>, Yunhui Dong<sup>a</sup>, Qing Liu<sup>a</sup>, Daopeng Zhang<sup>a</sup>, Lei Chen<sup>a\*</sup>, Zengdian Zhao<sup>a\*</sup> and Hui Liu<sup>a\*</sup>

---

## Table of contents

|                                                                                |    |
|--------------------------------------------------------------------------------|----|
| 1. General Information.....                                                    | 3  |
| 2. General Procedure for Solid-State Cross-Coupling .....                      | 5  |
| 3. Ferromagnetic rods of different specifications .....                        | 11 |
| 4. SEM-EDS data analysis of ferromagnetic rod (0.35*0.5mm) .....               | 12 |
| 5. SEM analysis for crude product and Mapping images of palladium. ....        | 14 |
| 6. Reaction Temperature Confirmed by Electronic temperature measuring gun..... | 16 |
| 7. Characterization of Obtained Coupling Products.....                         | 17 |
| 8. Optimization of the Reaction Conditions. ....                               | 42 |
| 9. References.....                                                             | 43 |
| 10. Copies of the <sup>1</sup> H NMR, <sup>13</sup> C NMR .....                | 46 |

---

## 1. General Information

The starting materials were obtained from commercial suppliers and used as received. The ferromagnetic rod used is SUS304 stainless steel, which is purchased from Donghuan Feiada Metal Materials Co., Ltd. and then processed by ourselves. Solvents were purchased from commercial suppliers. Purifications of reaction products were carried out by flash chromatography using Merck silica gel (40-63  $\mu$  m). All mechanochemical reactions were carried out using grinding vessels in a Magnetic grinding machine. The reaction bottles used were commercially available 10 ml flat bottom flask or customized reaction jar (6.5 $\times$ 8cm). The grinding medium is customized ferromagnetic rods (3.5 $\times$ 0.5mm).  $^1\text{H}$  NMR (400 MHz),  $^{13}\text{C}$  NMR (100 MHz) were measured on a Bruker Avance 400 MHz spectrometer. Chemical shifts are reported in parts per million (ppm,  $\delta$ ) downfield from residual solvent peaks and coupling constants are reported as Hertz (Hz). Splitting patterns are designated as singlet (s), doublet (d), triplet (t), .... Splitting patterns that could not be interpreted or easily visualized are designated as multiplet (m). Electrospray mass spectra were obtained using an ESI/TOF Mariner Mass Spectrometer. Unless otherwise noted, all other commercially available reagents and solvents were used without further purification.

About the magnetic grinding used: The magnetic grinding machine (Figure S1) is self-developed and has not yet been put into commercial use, and the instrument consists of two parts, the working room (left blue part of the picture) and the console (right part of the picture). The left cavity is the main working part. The four square magnets rotate around the cavity to form a rotating magnetic field, which drives the ferromagnetic rod to move. The magnetic field strength is about 0.2T. Unknown compounds synthesized in the manuscript as follows: 3p 3q 3u 3w 3x 4a 4b 4f 4l 4n 4o 4p 4s 4t 6c 7b 7c 7d 7e 8b 8d.

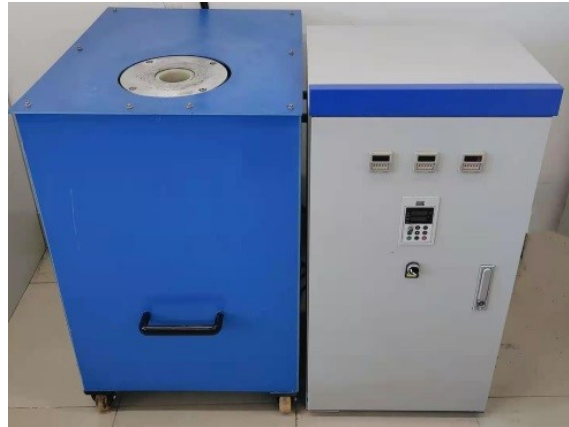

**Figure S1.** Magnetic Grinding equipment

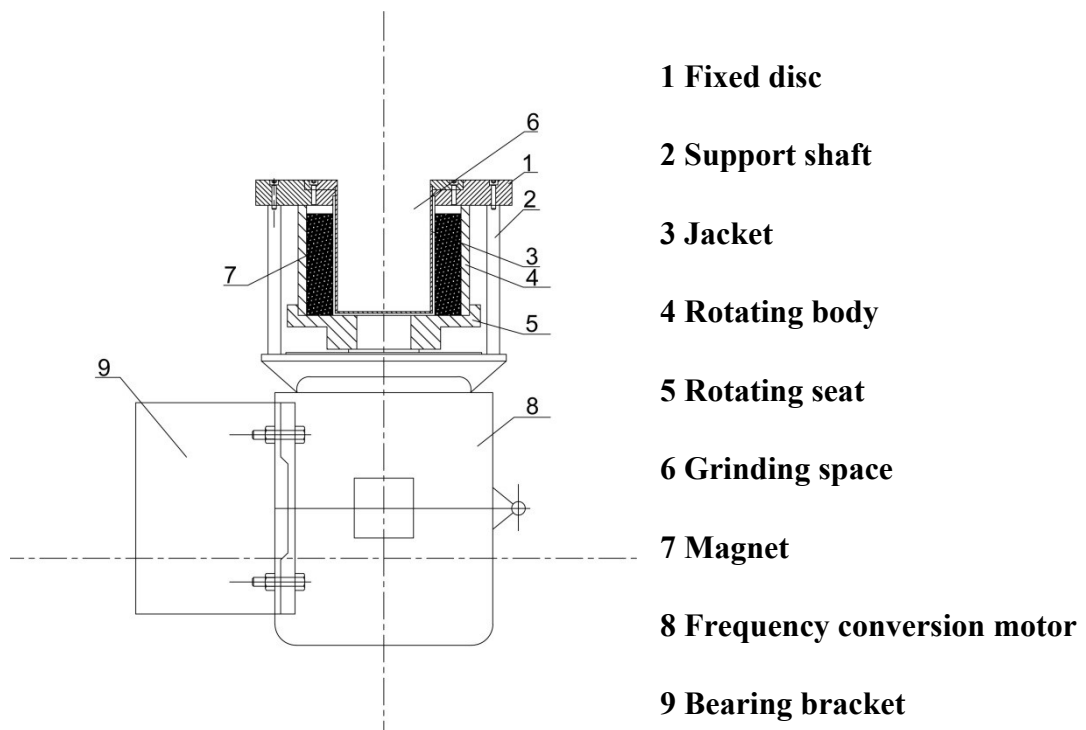

**Figure S2.** Plan view of Magnetic Grinding equipment( left blue part)

## 2. General Procedure for Solid-State Cross-Coupling

### 1) Procedure I: General solid-state cross-coupling reaction

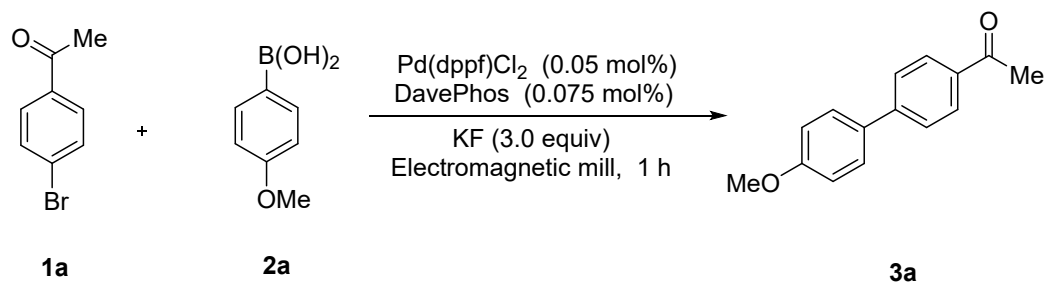

Aryl halide **1a** (199.04mg, 1mmol, 1.0equiv), aryl boronic acid **2a** [181.2mg(10mg+171.2mg), 1.2mmol, 1.2 equiv], Pd(dppf)Cl<sub>2</sub> (0.4mg, 0.05% mmol) and DavePhos (0.3mg, 0.075%mmol), KF (174.21mg, 3mmol, 3.0 equiv) ferromagnetic rods 5g (about a quarter of the volume of the bottle) were placed in a flat bottom flask. Put it in magnetic grinder. After 1 h, the mixture was dissolved in CH<sub>2</sub>Cl<sub>2</sub>, filtering out ferromagnetic rods. Then remove the inorganic salt from the mixture with water. The organic phase was combined, dried over Na<sub>2</sub>SO<sub>4</sub>, evaporated and purified by flash chromatography (PE: EA = 10:1) to give compound **3a** (224.0 mg, 99% yield).

Weighting of 0.4 mg Pd(dppf)Cl<sub>2</sub> and 0.3mg DavePhos, taking procedure 1 as an example, first we weight 4 mg catalyst, 3 mg DavePhos and 100 mg 2a into a 100 ml eggplant-shaped flask, then dissolve with 20 ml CHCl<sub>3</sub>, stir well, and then spin dry to vacuumize. When we weigh 2a, we first weigh 10 mg of the mixed starting material, which contains 0.4 mg of catalyst and 0.3 mg of ligand, and then weigh 171.2 mg of pure product 2a.

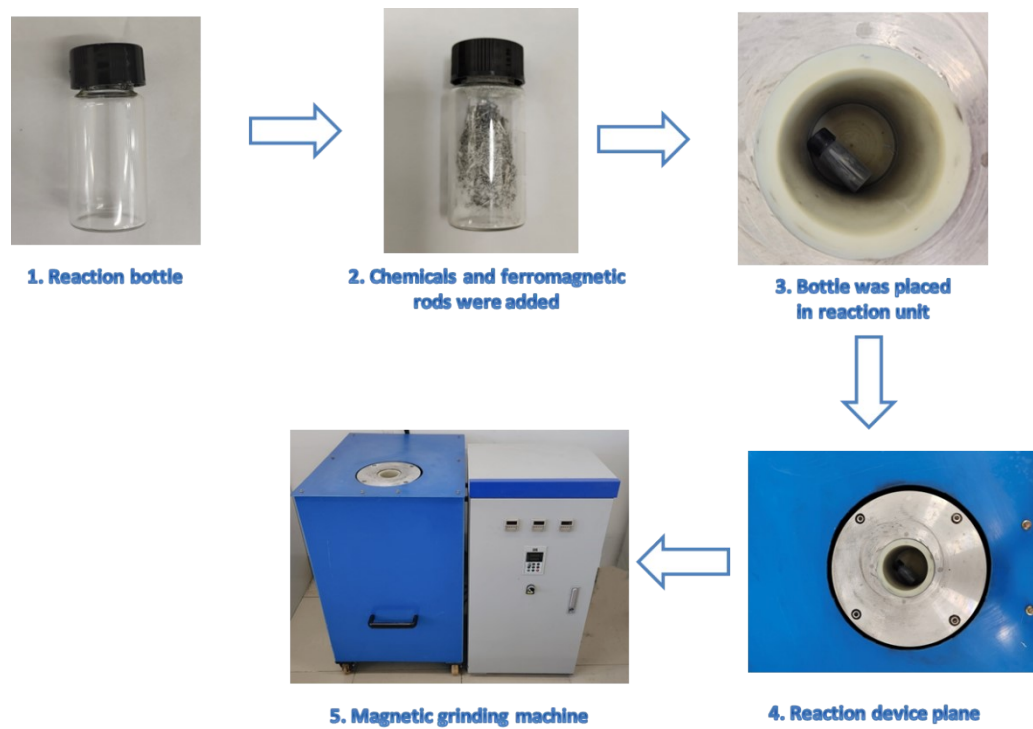

**Figure S3.**Set-up procedure for the solid-state cross-coupling.

## 2) Procedure II: Procedure for Solid-State Cross-Coupling at Gram Scale

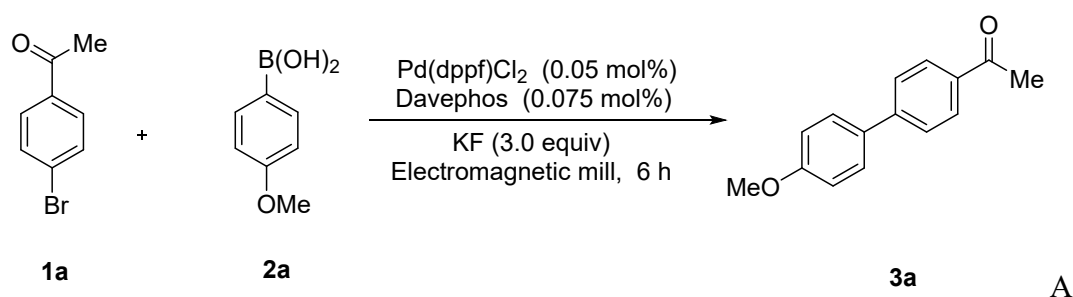

aryl halide **1a** (2g, 5mmol 1.0equiv), aryl boronic acid **2a** (1.81g, 6.1mmol, 1.2 equiv), Pd(dppf)Cl<sub>2</sub> (1.8 mg, 0.05% mmol) and DavePhos (1.5 mg, 0.075% mmol), KF (0.87g, 1.5mmol 3.0 equiv) ferromagnetic rods 20g (about a quarter of the volume of the jar) were placed in ferromagnetic rods. After 6 h, the mixture was dissolved in CH<sub>2</sub>Cl<sub>2</sub>, filtering out ferromagnetic rods. Then remove the inorganic salt from the mixture with water. The organic phase was combined, dried over Na<sub>2</sub>SO<sub>4</sub>, evaporated and purified by flash chromatography (PE:EA = 10:1) to give compound **3a** (2.08g, 92% yield).

## 3) Procedure III: Coupling procedure for fluorescent products

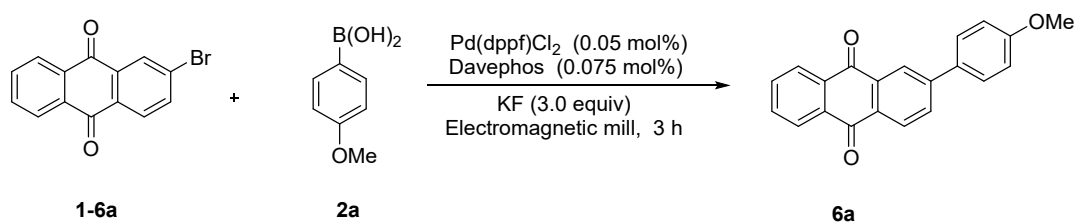

Aryl halide **1-6a** (287.11mg, 1mmol 1.0equiv), aryl boronic acid **2a** (181.2mg, 1.2mmol, 1.2 equiv), Pd(dppf)Cl<sub>2</sub> (0.4 mg, 0.05% mmol) and DavePhos (0.3 mg, 0.075% mmol), KF (174.21g, 3mmol 3.0 equiv) ferromagnetic rods 5g (about a quarter of the volume of the jar) were placed in flat bottom flask. After 3 h, the mixture was dissolved in CH<sub>2</sub>Cl<sub>2</sub>, filtering out ferromagnetic rods. Then remove the inorganic salt from the mixture with water. The organic phase was combined, dried over Na<sub>2</sub>SO<sub>4</sub>, evaporated and purified by flash chromatography (PE: EA= 10:1) to give compound yellow solid **6a** (300mg, 95% yield).

#### 4) Procedure IV: Coupling procedure for insoluble compounds

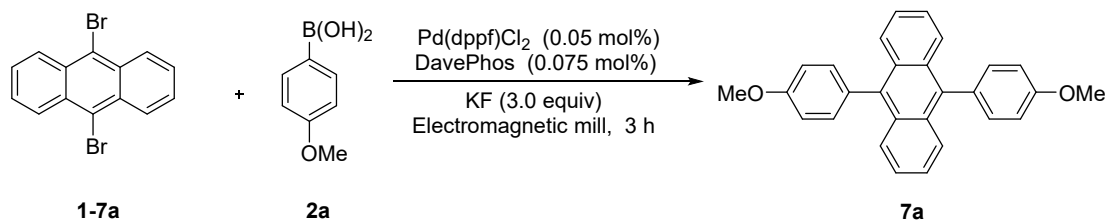

Aryl halide **1-7a** (168.01mg, 0.5mmol 1.0equiv), aryl boronic acid **2a** (181.2mg, 1.2mmol, 1.2 equiv), Pd(dppf)Cl<sub>2</sub> (0.4 mg, 0.05% mmol) and DavePhos (0.3 mg, 0.075% mmol), KF (174.21g, 3mmol 3.0 equiv) ferromagnetic rods 5g (about a quarter of the volume of the jar) were placed in flat bottom flask. After 1 h, the mixture was dissolved in CH<sub>2</sub>Cl<sub>2</sub>, filtering out ferromagnetic rods. Then remove the inorganic salt from the mixture with water. The organic phase was combined, dried over Na<sub>2</sub>SO<sub>4</sub>, evaporated and purified by flash chromatography (PE: EA = 10:1-1:1) to give compound yellow solid **7a** (145mg, 74% yield).



## Solubility evaluation of compounds

An compound (7d.7e) and toluene were add vial and stirred for 1 h at room temperature (23°C). Then the mixture was filtered using a syringe filter (diameter; 0.22 um) and concentrated under reduced pressure until the weight of a flask with the obtained solid was not changed. The solubility was evaluated by measuring the weight of the obtained solid. (1-7a, 1-7b, 1-7c solubility [1])

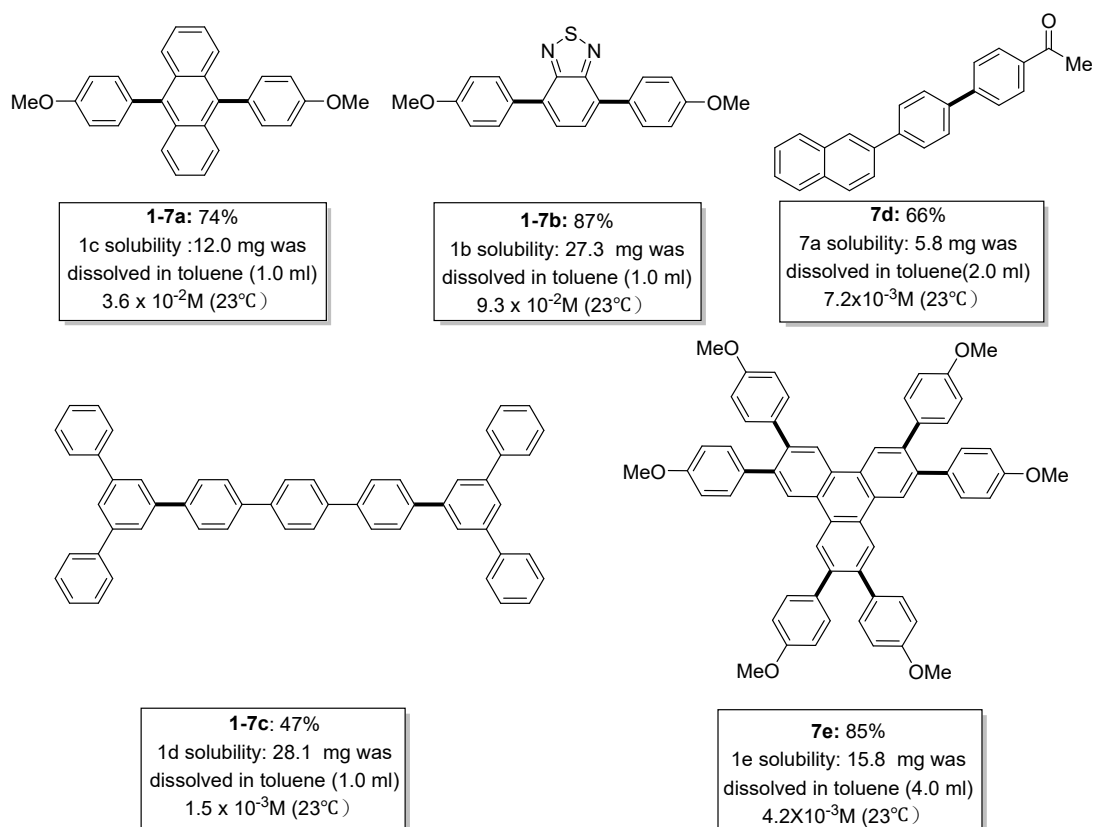

**Figure S4.** Solubility evaluation of compounds.

---

#### 4) Procedure V: General procedure for drug molecular coupling

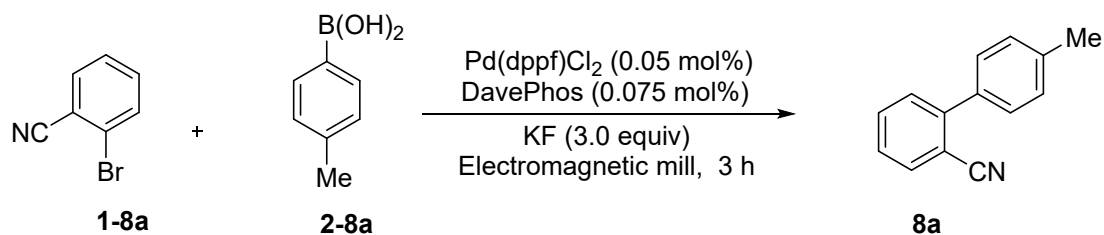

Aryl halide **1-8a** (182.02mg, 1mmol 1.0equiv), aryl boronic acid **2-8a** (163.152mg, 1.5mmol, 1.2 equiv), Pd(dppf)Cl<sub>2</sub> (0.4 mg, 0.05% mmol) and DavePhos (0.3 mg, 0.075% mmol), KF (174.21g, 3mmol 3.0 equiv) ferromagnetic rods 5g (about a quarter of the volume of the jar) were placed flat bottom flask. After 1 h, the mixture was dissolved in CH<sub>2</sub>Cl<sub>2</sub>, filtering out ferromagnetic rods. Then remove the inorganic salt from the mixture with water. The organic phase was combined, dried over Na<sub>2</sub>SO<sub>4</sub>, evaporated and purified by flash chromatography (PE: EA = 10:1) to give compound white solid **8a** (139.14mg, 72% yield).

---

### 3. Ferromagnetic rods of different specifications

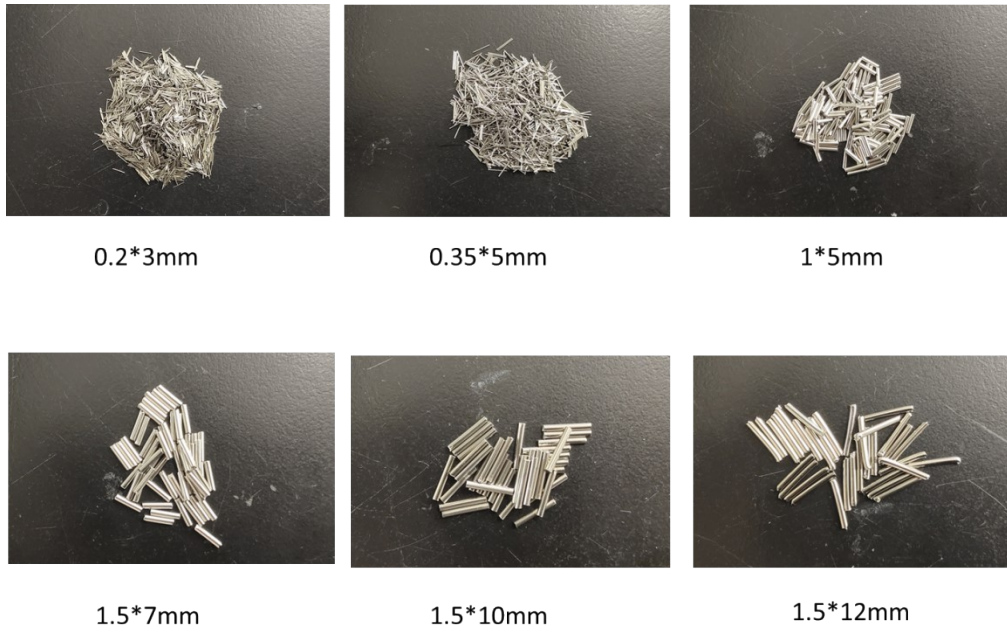

**Figure S5.** Ferromagnetic rods of different sizes used in experiments

#### 4. SEM-EDS data analysis of ferromagnetic rod (0.35\*0.5mm)

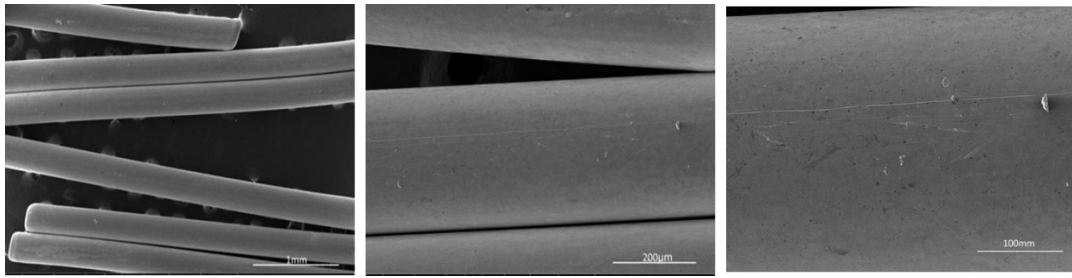

Figure S6. Morphology of ferromagnetic rod under scanning electron microscope

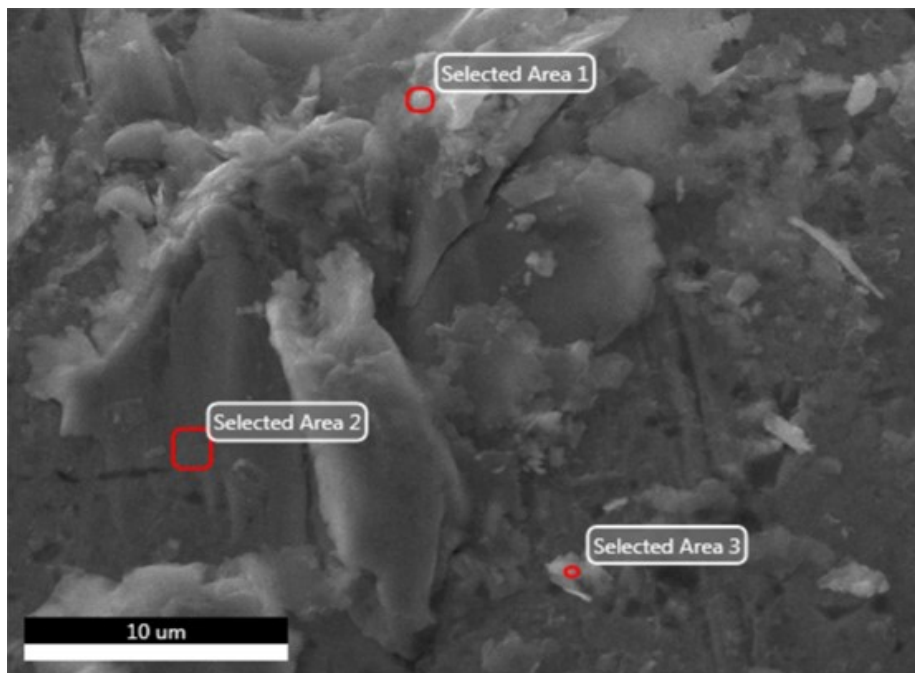

Selected Area 1

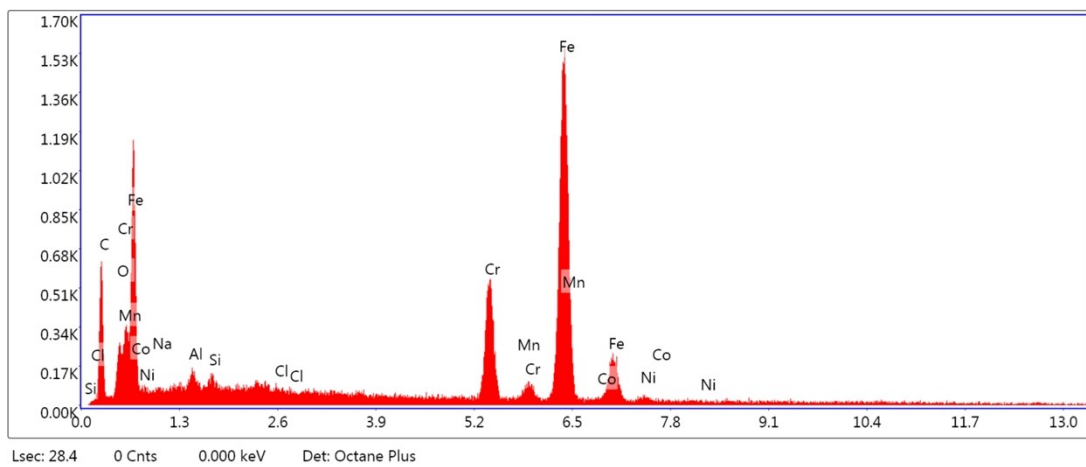

Selected Area 2

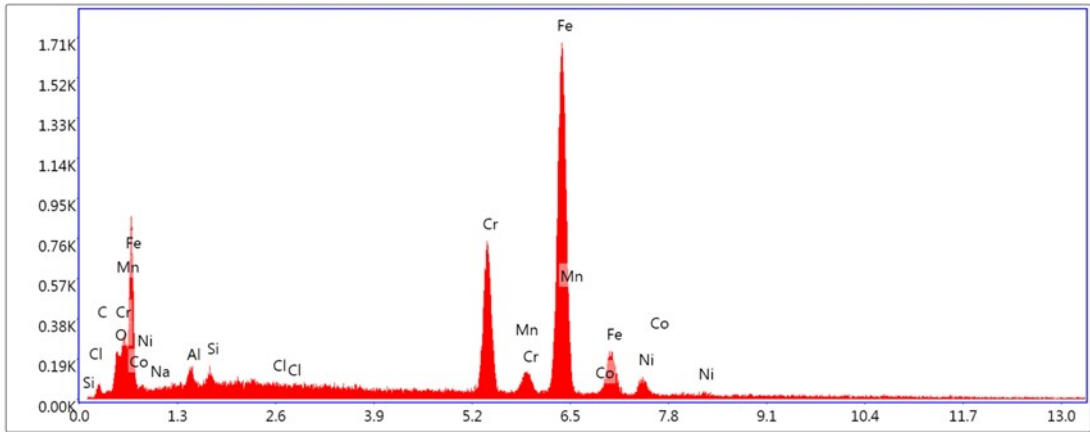

Lsec: 28.3 0 Cnts 0.000 keV Det: Octane Plus

### Selected Area 3

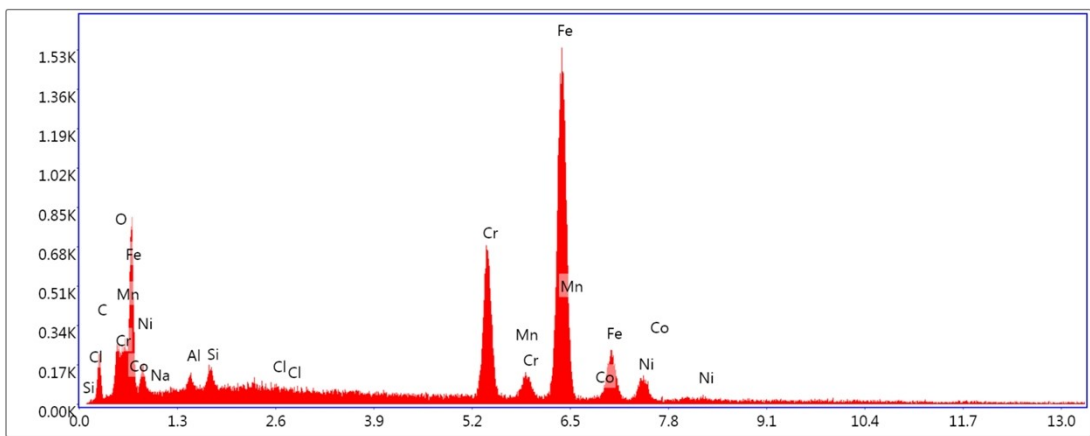

Lsec: 28.4 0 Cnts 0.000 keV Det: Octane Plus

## 5. SEM analysis for crude product and Mapping images of palladium.

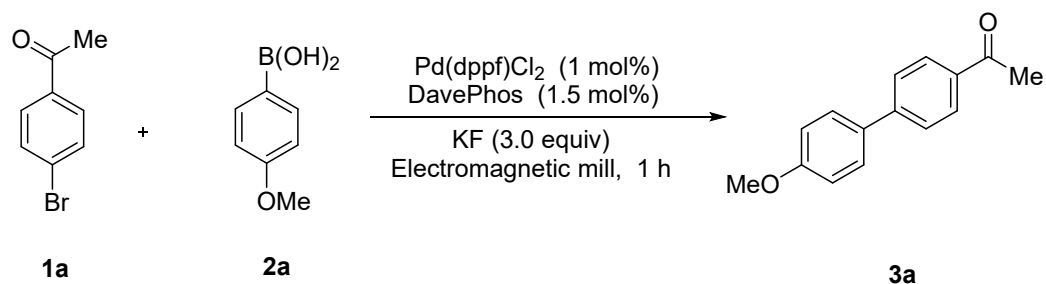

Aryl halide 1a (199.04mg, 1mmol 1.0equiv), aryl boronic acid 2a [181.2mg, 1.2mmol, 1.2 equiv], Pd(dppf)Cl<sub>2</sub> (7.3mg, 15% mmol) and DavePhos (3.9mg, 1.5%mmol), KF (174.21mg, 3mmol 3.0 equiv) ferromagnetic rods 5g were placed in a flat bottom flask. Set up a set of control experiment (before the reaction) and one put in the grinder for 1 h (after the reaction). The ferromagnetic rods were separated, and the crude product was ground into powder for SEM analysis and the results as follows:

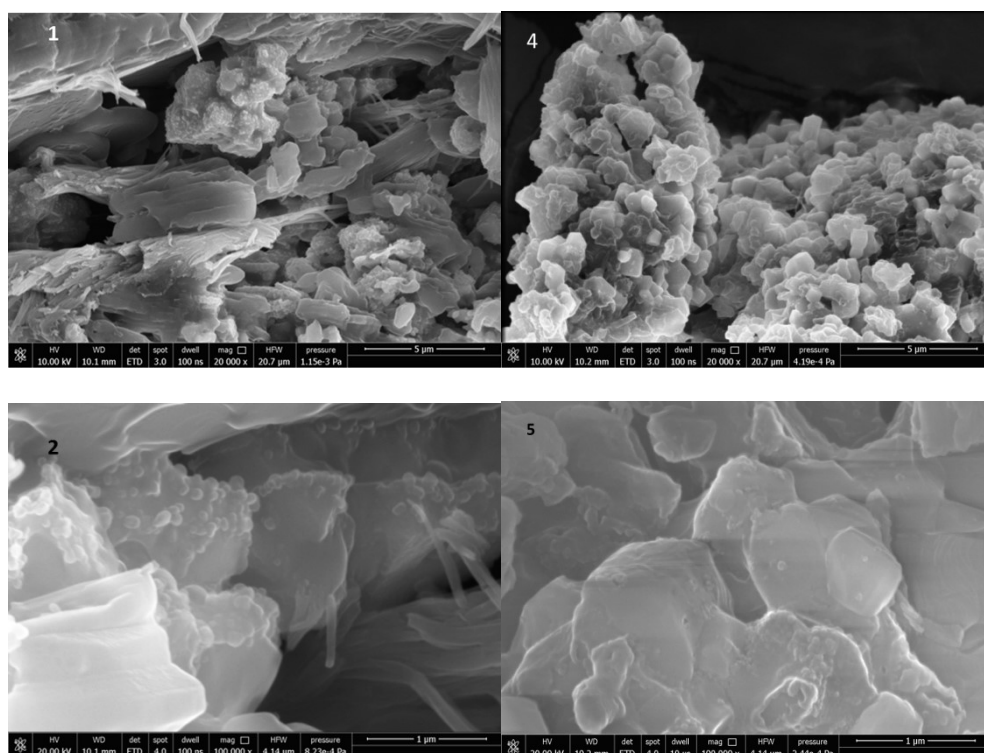

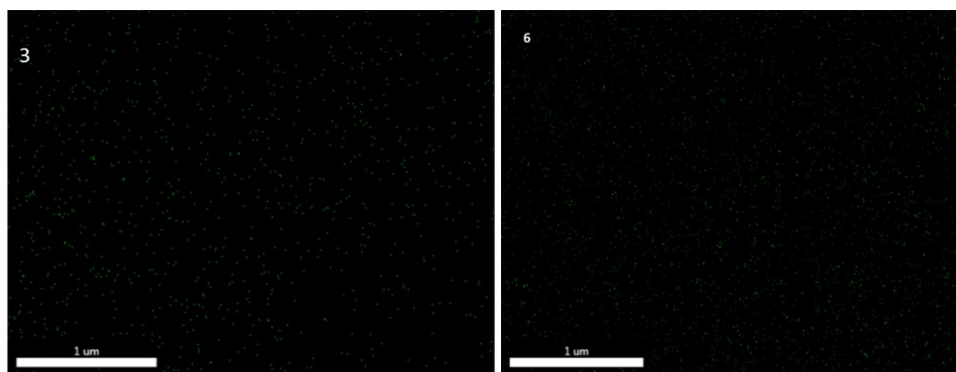

**Figure S7.** 1 and 2: SEM images of the crude reaction mixtures before the reaction. 3: Mapping images of palladium before the reaction. 4 and 5: SEM images of the crude reaction mixtures (after 1 h with 1 mol% palladium catalyst). 6: Mapping image of palladium after the reaction was completed.

---

## 6. Reaction Temperature Confirmed by Electronic temperature measuring gun

The temperature inside the reaction bottle after the solid-state coupling reaction was confirmed by Electronic temperature measuring gun. The crude mixtures were prepared by the following **standard conditions**: 1 mmol of **1a**; 1.2 mmol of **1b**; 0.0005 mmol of PdCl<sub>2</sub>(dppf); 0.00075 mmol of DavePhos, 3 mmol of KF, 50 Hz; 1 h. The obtained data showed that the temperature was around 75°C.



## 7. Characterization of Obtained Coupling Products.

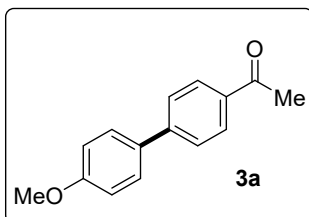

**1-(4'-methoxy-[1,1'-biphenyl]-4-yl)ethan-1-one**

<sup>1</sup>H and <sup>13</sup>C NMR were in agreement with the literature<sup>2</sup>.

**C<sub>15</sub>H<sub>14</sub>O<sub>2</sub> Melting Point :150.0 °C -153.7 °C**

**MW: 226.28 g·mol<sup>-1</sup> White Solid Isolated amounts: 224.0 mg Yield: 99%**

**<sup>1</sup>H NMR (400 MHz, CDCl<sub>3</sub>, δ ppm):** 8.01 (d, *J* =7.6 Hz, 2H), 7.64 (d, *J* =7.6 Hz, 2H), 7.58 (d, *J* =8.0 Hz, 2H), 7.00 (d, *J* =8.0 Hz, 2H), 3.86(s, 3H). 2.63 (s, 3H),

**<sup>13</sup>C NMR (100 MHz, CDCl<sub>3</sub>, δ ppm):** 197.75, 159.84, 145.31, 135.18, 132.16, 128.90, 128.31, 128.55, 114.34, 55.33, 26.60.

**HRMS (ESI) Calcd for C<sub>15</sub>H<sub>14</sub>O<sub>2</sub>+H 227.1080, Found 227.1072**

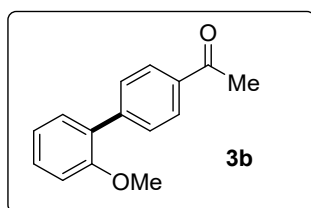

**1-(2'-methoxy-[1,1'-biphenyl]-4-yl)ethan-1-one**

<sup>1</sup>H and <sup>13</sup>C NMR were in agreement with the literature<sup>3</sup>

**C<sub>15</sub>H<sub>14</sub>O<sub>2</sub> Melting Point :106.5 °C -106.8 °C**

**Melting Point were in agreement with the literature<sup>3</sup>  
(105 °C -106 °C)**

**MW: 226.28 g·mol<sup>-1</sup> White Solid Isolated amounts: 208.18 mg Yield: 92%**

**<sup>1</sup>H NMR (400 MHz, CDCl<sub>3</sub>, δ ppm):** 8.00 (d, *J* =7.6 Hz, 2H), 7.64 (d, *J* =7.6 Hz, 2H) 7.36 (q, *J* =9.6 Hz, 2H), 7.07-7.00 (m, 2H), 3.83 (s, 3H), 2.64 (s, 3H)

**<sup>13</sup>C NMR (100 MHz, CDCl<sub>3</sub>, δ ppm):** 197.90, 156.41, 143.56, 135.45, 130.69, 129.70, 129.46, 129.40, 128.06, 120.92, 111.28, 55.54, 26.65.

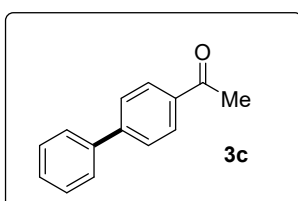

**1-([1,1'-biphenyl]-4-yl)ethan-1-one**

<sup>1</sup>H and <sup>13</sup>C NMR were in agreement with the literature<sup>4</sup>

**C<sub>14</sub>H<sub>12</sub>O Melting Point :120.50 °C - 121.2 °C**

**Melting Point were in agreement with the literature<sup>4</sup> (117 °C -118 °C)**

**MW: 196.25g·mol<sup>-1</sup> Pale yellow solid Isolated amounts:184.48 mg Yield: 94%**

---

**<sup>1</sup>H NMR (400 MHz, CDCl<sub>3</sub>, δ ppm):** 8.04 (d, *J* = 7.6 Hz, 2H), 7.69 (d, *J* = 7.6 Hz, 2H)  
7.63 (d, *J* = 7.2 Hz, 2 H), 7.48 (t, *J* = 7.2 Hz, 2H), 7.41(t, *J* = 7.2 Hz, 1H), 2.64 (s, 3H)

**<sup>13</sup>C NMR (100 MHz, CDCl<sub>3</sub>, δ ppm):** 197.75, 145.72, 139.79, 135.76, 128.90,  
128.87, 128.18, 127.21, 127.17, 26.64.

---

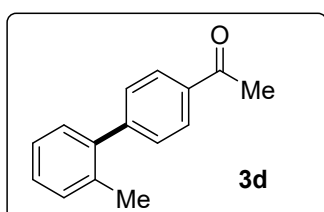

**1-(2'-methyl-[1,1'-biphenyl]-4-yl)ethan-1-one**

**<sup>1</sup>H and <sup>13</sup>C NMR were in agreement with the literature<sup>5</sup>**

**C<sub>15</sub>H<sub>14</sub>O**

**MW: 210.28 g·mol<sup>-1</sup>**

**Yellow Oil**

**Isolated amounts: 203.97 mg**

**Yield: 97%**

**<sup>1</sup>H NMR (400 MHz, CDCl<sub>3</sub>, δ ppm):** 7.99 (d, *J* = 7.6 Hz, 2H), 7.40 (d, *J* = 7.6 Hz, 2H)  
7.26-7.19 (m, 4 H), 2.61 (s, 3H), 2.25 (s, 3H).

**<sup>13</sup>C NMR (100 MHz, CDCl<sub>3</sub>, δ ppm):** 197.52, 146.70, 140.50, 135.35, 134.89,  
130.34, 129.28, 129.24, 128.02, 127.71, 125.75, 26.42, 20.20

---

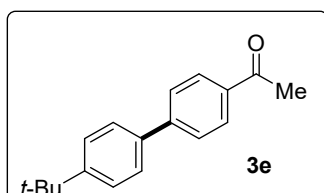

**1-(4'-(tert-butyl)-[1,1'-biphenyl]-4-yl)ethan-1-one**

**<sup>1</sup>H and <sup>13</sup>C NMR were in agreement with the literature<sup>6</sup>**

**C<sub>18</sub>H<sub>20</sub>O Melting Point :129.9 °C -131.2 °C**

**MW: 252.38 g·mol<sup>-1</sup>**

**White Solid**

**Isolated amounts: 239.76 mg**

**Yield: 95%**

**<sup>1</sup>H NMR (400 MHz, CDCl<sub>3</sub>, δ ppm):** 7.98 (d, *J* = 7.6 Hz, 2H), 7.64 (d, *J* = 8.0 Hz,  
2H), 7.55 (d, *J* = 7.6 Hz, 2H), 7.47 (d, *J* = 7.6 Hz, 2H), 2.58 (s, 3H), 1.35 (s, 9H)

**<sup>13</sup>C NMR (100 MHz, CDCl<sub>3</sub>, δ ppm):** 197.76, 151.41, 145.57 136.86, 135.55,  
128.87, 126.96, 126.89, 125.91, 34.61, 31.28, 26.65,.

---

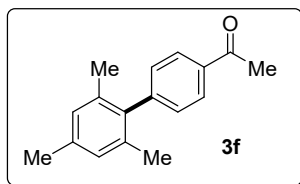

**1-(2',4',6'-trimethyl-[1,1'-biphenyl]-4-yl)ethan-1-one**  
**<sup>1</sup>H and <sup>13</sup>C NMR were in agreement with the literature<sup>6</sup>**  
**C<sub>17</sub>H<sub>18</sub>O**    **Melting Point :93.8 °C -94.5 °C**

**MW: 238.33 g·mol<sup>-1</sup>**                      **White Solid**

**Isolated amounts: 197.81 mg**                      **Yield: 83%**

**<sup>1</sup>H NMR (400 MHz, CDCl<sub>3</sub>, δ ppm):** 7.94 (d, *J*=8 Hz, 2H), 7.17 (d, *J*=7.6 Hz, 2H)  
6.87 (s, 2H), 2.57 (s, 3H), 2.25 (s, 3H), 1.90 (s, 6H)

**<sup>13</sup>C NMR (100 MHz, CDCl<sub>3</sub>, δ ppm):** 197.89, 146.49, 137.83, 137.08, 135.41,  
129.63, 128.49, 128.15, 26.59, 20.98, 20.60.

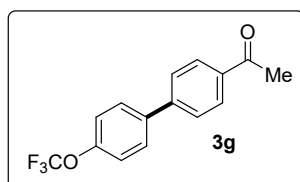

**1-(4'-(trifluoromethoxy)-[1,1'-biphenyl]-4-yl)ethan-1-one**  
**<sup>1</sup>H and <sup>13</sup>C NMR were in agreement with the literature<sup>7</sup>**  
**C<sub>15</sub>H<sub>11</sub>F<sub>3</sub>O<sub>2</sub>**    **Melting Point :85.9 °C -86.5 °C**

**MW: 280.25 g·mol<sup>-1</sup>**    **White Solid**    **Isolated amounts: 238.21 mg**    **Yield: 85%**

**<sup>1</sup>H NMR (400 MHz, CDCl<sub>3</sub>, δ ppm):** 8.02 (d, *J*=7.6 Hz, 2H), 7.62 (d, *J*=9.2 Hz,  
4H), 7.30 (d, *J*=8.0 Hz, 2H), 2.62 (s, 3H).

**<sup>13</sup>C NMR (100 MHz, CDCl<sub>3</sub>, δ ppm):** 197.43, 149.15(d, *J*=2 Hz), 144.04, 138.39,  
136.00, 128.87, 128.52, 127.02, 121.21, 26.45.

**<sup>19</sup>F NMR (376 MHz, CDCl<sub>3</sub>, δ ppm):** δ -57.82

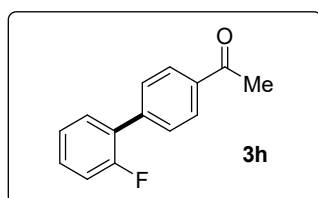

**1-(2'-fluoro-[1,1'-biphenyl]-4-yl)ethan-1-one**  
**<sup>1</sup>H and <sup>13</sup>C NMR were in agreement with the literature<sup>8</sup>**  
**C<sub>14</sub>H<sub>11</sub>FO**    **Melting Point :84.9 °C -85.8 °C** **Melting Point**  
**were in agreement with the literature<sup>8</sup>(84.5 °C -86.0 °C)**

**MW: 214.24 g·mol<sup>-1</sup>**    **White Solid**    **Isolated amounts: 162.82 mg**    **Yield: 76%**

**<sup>1</sup>H NMR (400 MHz, CDCl<sub>3</sub>, δ ppm):** 8.04 (d, *J*=7.6 Hz, 2H), 7.66 (d, *J*=8.0 Hz,  
2H), 7.46 (t, *J*=7.6 Hz, 1H), 7.37 (q, *J*=6.0 Hz, 1H), 7.24 (d, *J*=7.4 Hz, 1H), 7.18  
(t, *J*=9.6 Hz, 1H), 2.65 (s, 3H),

---

**<sup>13</sup>C NMR (100 MHz, CDCl<sub>3</sub>, δ ppm):** 197.74, 160.92, 158.45, 140.53, 136.04, 130.58 (d, *J* = 3 Hz) 129.87 (d, *J* = 8 Hz), 129.18 (d, *J* = 3 Hz), 128.45, 127.84 (d, *J* = 13 Hz), 124.53 (d, *J* = 3 Hz), 116.26 (d, *J* = 23 Hz), 26.68.

**<sup>19</sup>F NMR (376 MHz, CDCl<sub>3</sub>, δ ppm):** δ -117.48

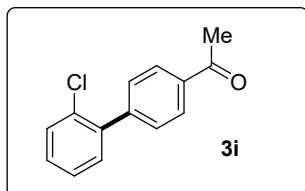

---

**1-(2'-chloro-[1,1'-biphenyl]-4-yl)ethan-1-one**

**<sup>1</sup>H and <sup>13</sup>C NMR were in agreement with the literature<sup>9</sup>**

**C<sub>14</sub>H<sub>11</sub>ClO** Melting Point :52.9 °C -53.9 °C

**Melting Point were in agreement with the literature<sup>9</sup>(52. °C -54 °C)**

**MW:** 230.69 g·mol<sup>-1</sup> **White Solid** **Isolated amounts:** 177.63 mg **Yield:** 77%

**<sup>1</sup>H NMR (400 MHz, CDCl<sub>3</sub>, δ ppm):** 8.03 (d, *J* = 7.6 Hz, 2H), 7.55 (d, *J* = 8.0 Hz, 2H), 7.49 (d, *J* = 6.8 Hz, 1H), 7.34-7.31(m, 3H), 2.65 (s, 3H),

**<sup>13</sup>C NMR (100 MHz, CDCl<sub>3</sub>, δ ppm):** 197.73, 144.08, 139.34, 136.08, 132.25, 131.06, 130.08, 129.71, 129.17, 128.09, 126.96, 26.68

**HRMS (ESI) Calcd for C<sub>14</sub>H<sub>11</sub>ClO+H** 231.0572, Found 231.0577

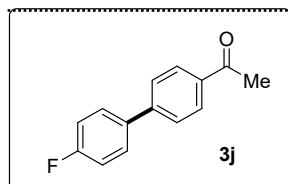

---

**1-(4'-fluoro-[1,1'-biphenyl]-4-yl)ethan-1-one**

**<sup>1</sup>H and <sup>13</sup>C NMR were in agreement with the literature<sup>7</sup>**

**C<sub>14</sub>H<sub>11</sub>FO** Melting Point :102.3 °C -103.7 °C

**MW:** 214.24 g·mol<sup>-1</sup> **White Solid** **Isolated amounts:** 194.96 mg **Yield:** 91%

**<sup>1</sup>H NMR (400 MHz, CDCl<sub>3</sub>, δ ppm):** 8.02 (d, *J* = 8.0 Hz, 2H), 7.64-7.57(m, 4H) 7.15 (t, *J* = 8.4 Hz, 2 H), 2.63 (s, 3H)

**<sup>13</sup>C NMR (100 MHz, CDCl<sub>3</sub>, δ ppm):** 197.62, 162.90(d, *J* = 246 Hz), 144.63, 135.90 (d, *J* = 3 Hz), 135.73, 128.91, 128.82, 126.98, 115.85, (d, *J* = 22 Hz), 26.62

**<sup>19</sup>F NMR (376 MHz, CDCl<sub>3</sub>, δ ppm):** δ -113.967.

---

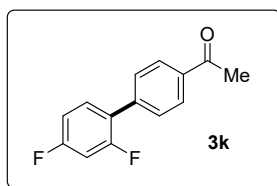

**1-(2',4'-difluoro-[1,1'-biphenyl]-4-yl)ethan-1-one**  
 $^1\text{H}$  and  $^{13}\text{C}$  NMR were in agreement with the literature<sup>4</sup>

$\text{C}_{14}\text{H}_{10}\text{F}_2\text{O}$  Melting Point :81.3 °C -82.5 °C

**Melting Point were in agreement with the literature(84 °C -93 °C)**

**MW: 230.07 g·mol<sup>-1</sup> White Solid Isolated amounts: 204.76 mg Yield: 89%**

**$^1\text{H}$  NMR (400 MHz,  $\text{CDCl}_3$ ,  $\delta$  ppm):** 8.02 (d,  $J$  =8.0 Hz, 2H), 7.59 (d,  $J$  =7.6 Hz, 2H), 7.42 (q,  $J$  =8 Hz, 1H), 6.99-6.90 (m, 2H), 2.63 (s, 3H)

**$^{13}\text{C}$  NMR (100 MHz,  $\text{CDCl}_3$ ,  $\delta$  ppm):** 197.58, 162.47 (dd,  $J$  =297, 12 Hz)159.97 (dd,  $J$  =298, 12Hz)139.59 (d, $J$  =1Hz) 136.07, 131.35 (dd,  $J$  = 10, 5 Hz) 128.99 (d,  $J$  = 2Hz), 124.10 (dd, $J$  = 14, 4 Hz) 111.81 (dd,  $J$  = 21, 4 Hz)104.60 (t,  $J$  = 17Hz), 26.61

**$^{19}\text{F}$  NMR (376 MHz,  $\text{CDCl}_3$ ,  $\delta$  ppm):**  $\delta$  -109.79,  $\delta$  -112.94

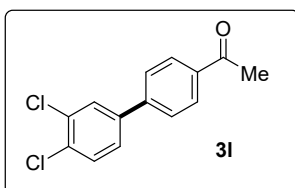

**1-(3',4'-dichloro-[1,1'-biphenyl]-4-yl)ethan-1-one**  
 $^1\text{H}$  and  $^{13}\text{C}$  NMR were in agreement with the literature<sup>4</sup>

$\text{C}_{14}\text{H}_{10}\text{Cl}_2\text{O}$  Melting Point :132.4 °C -132.6 °C

**MW: 265.13g·mol<sup>-1</sup> White Solid Isolated amounts: 188.24 mg Yield: 71%**

**$^1\text{H}$  NMR (400 MHz,  $\text{CDCl}_3$ ,  $\delta$  ppm):** 8.02 (d,  $J$  =8.0 Hz, 2H), 7.68 (s, 1H) 7.61 (d,  $J$  =8.0 Hz, 2H), 7.51 (d,  $J$  =8.4 Hz, 1H), 7.43 (d,  $J$  =8.0 Hz, 1H), 2.64 (s, 3H).

**$^{13}\text{C}$  NMR (100 MHz,  $\text{CDCl}_3$ ,  $\delta$  ppm):** 197.41, 142.98, 139.69, 136.37, 133.02, 132.39, 130.80, 128.98, 128.94, 126.97, 126.34, 26.62

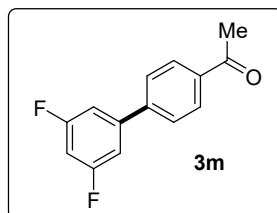

**1-(3',5'-difluoro-[1,1'-biphenyl]-4-yl)ethan-1-one**  
 $^1\text{H}$  and  $^{13}\text{C}$  NMR were in agreement with the literature<sup>11</sup>

$\text{C}_{14}\text{H}_{10}\text{F}_2\text{O}$  Melting Point :70.3 °C -70.8 °C

**MW: 230.07 g·mol<sup>-1</sup>**

**White Solid**

**Isolated amounts: 179.45 mg**

**Yield: 78%**

**$^1\text{H}$  NMR (400 MHz,  $\text{CDCl}_3$ ,  $\delta$  ppm):** 8.02 (d,  $J$  =7.6 Hz, 2H), 7.61 (d,  $J$  =7.6 Hz, 2H) 7.11 (d,  $J$  =7.2 Hz, 2H), 6.81(t,  $J$  =8.4 Hz, 1H) 2.63 (s, 3H).

---

**<sup>13</sup>C NMR (100 MHz, CDCl<sub>3</sub>, δ ppm):** 197.40, 163.24(dd, *J*=260,235 Hz),143.06, 143.06, 142.92, 136.67, 128.97, 127.08, 110.07(dd, *J*=26,12Hz), 103.34(t, *J*=25Hz) 26.60.

**<sup>19</sup>F NMR (376 MHz, CDCl<sub>3</sub>, δ ppm):** δ -57.82

---

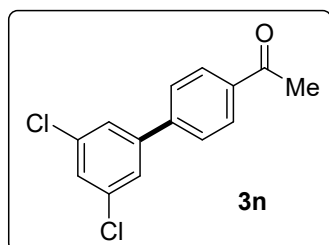

**1-(3',5'-dichloro-[1,1'-biphenyl]-4-yl)ethan-1-one**  
**<sup>1</sup>H and <sup>13</sup>C NMR were in agreement with the literature<sup>4</sup>.**

**C<sub>14</sub>H<sub>10</sub>Cl<sub>2</sub>O**    **Melting Point :63.5 °C -65.7 °C**

**Melting Point were in agreement with the literature(64 °C -66 °C)**

**MW: 265.13 g·mol<sup>-1</sup>    White Solid    Isolated amounts: 217.69 mg    Yield: 85%**

**<sup>1</sup>H NMR (400 MHz, CDCl<sub>3</sub>, δ ppm):** 8.04 (d, *J*=8.0 Hz, 2H), 7.63 (d, *J*=8.0 Hz, 2H) 7.48 (s, 2 H), 7.39 (s, 1H), 2.65 (s, 3H).

**<sup>13</sup>C NMR (100 MHz, CDCl<sub>3</sub>, δ ppm):** 197.46, 142.84, 142.78, 136.71, 135.48, 129.04, 128.00, 127.22, 125.73, 26.70.

---

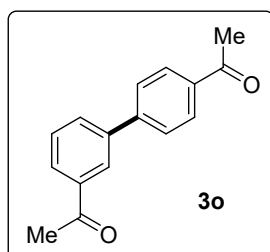

**1,1'-([1,1'-biphenyl]-3,4'-diyl)bis(ethan-1-one)**  
**<sup>1</sup>H and <sup>13</sup>C NMR were in agreement with the literature<sup>12</sup>**

**C<sub>16</sub>H<sub>14</sub>O<sub>2</sub>**    **Melting Point :104.9 °C -105.2 °C**

**MW: 238.10 g·mol<sup>-1</sup>    White Solid**

**Isolated amounts: 188.10 mg    Yield: 79%**

**<sup>1</sup>H NMR (400 MHz, CDCl<sub>3</sub>, δ ppm):** 8.16 (s, 1H), 7.99 (d, *J*=7.6 Hz, 2H), 7.92 (d, *J*=7.6 Hz, 1H), 7.6 (d, *J*=7.6 Hz, 1H), 7.65 (d, *J*=7.6 Hz, 2H) ,7.51 (t, *J*=7.6 Hz 1H), 2.61(s, 3H), 2.59(s, 3H)

**<sup>13</sup>C NMR (100 MHz, CDCl<sub>3</sub>, δ ppm):** 197.83, 197.64, 144.59, 140.35, 137.67, 136.20, 131.74, 129.23, 128.98, 128.09, 127.28, 126.91, 26.76, 26.69.

---

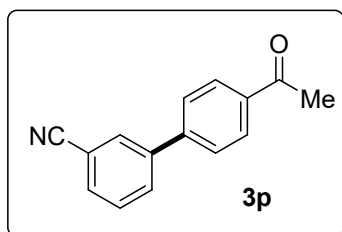

**4'-acetyl-[1,1'-biphenyl]-3-carbonitrile**

**C<sub>15</sub>H<sub>11</sub>NO** Melting Point :132.5 °C -132.7 °C

MW: 221.08 g·mol<sup>-1</sup>

**White Solid**

Isolated amounts: 174.65 mg

**Yield: 79%**

**<sup>1</sup>H NMR (400 MHz, CDCl<sub>3</sub>, δ ppm):** 8.06 (d, *J* = 8 Hz, 2H), 7.88 (s, 1H), 7.84 (d, *J* = 8 Hz, 1H), 7.66 (t, *J* = 8.6 Hz, 3H), 7.58 (t, *J* = 7.8 Hz, 1H), 2.65 (s, 3H)

**<sup>13</sup>C NMR (100 MHz, CDCl<sub>3</sub>, δ ppm):** 197.47, 143.18, 141.11, 136.67, 131.55, 130.78, 129.81, 129.13, 127.25, 118.53, 113.19, 26.72.

**HRMS (ESI)** Calcd for C<sub>15</sub>H<sub>11</sub>NO+H 222.0922, Found 222.0919

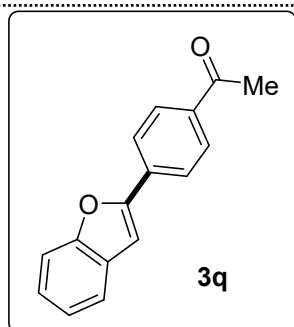

**1-(4-(benzofuran-2-yl)phenyl)ethan-1-one**

**C<sub>16</sub>H<sub>12</sub>O<sub>2</sub>** Melting Point :169.0 °C -169.9 °C

MW: 236.27 g·mol<sup>-1</sup>

**White Solid**

Isolated amounts: 186.65 mg

**Yield: 79%**

**<sup>1</sup>H NMR (400 MHz, CDCl<sub>3</sub>, δ ppm):** 8.04 (d, *J* = 8.0 Hz, 2H), 7.95 (d, *J* = 8.0 Hz, 2H), 7.62 (d, *J* = 7.6 Hz, 1H), 7.55 (d, *J* = 8.0 Hz, 1H), 7.34 (t, *J* = 7.6 Hz, 1H), 7.28-7.24 (m, 1H), 7.17 (s, 1H), 2.64 (s, 3H)

**<sup>13</sup>C NMR (100 MHz, CDCl<sub>3</sub>, δ ppm):** 197.36, 155.17, 154.50, 136.48, 134.57, 128.92, 128.85, 125.13, 124.76, 123.23, 121.31, 111.34, 103.64, 26.65.

**HRMS (ESI)** Calcd for C<sub>16</sub>H<sub>12</sub>O<sub>2</sub>+H 237.0925, Found 237.0916

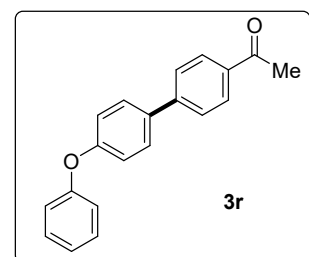

**1-(4'-phenoxy-[1,1'-biphenyl]-4-yl)ethan-1-one**

**<sup>1</sup>H and <sup>13</sup>C NMR were in agreement with the literature<sup>13</sup>**

**C<sub>20</sub>H<sub>12</sub>O<sub>2</sub>** Melting Point :127.8 °C -128.3 °C

MW: 288.35 g·mol<sup>-1</sup> **White Solid** Isolated amounts: 210.50 mg **Yield: 73%**

**<sup>1</sup>H NMR (400 MHz, CDCl<sub>3</sub>, δ ppm):** 8.03 (d, *J* = 7.6 Hz, 2H), 7.66 (d, *J* = 7.2 Hz,

2H) 7.60 (d,  $J=7.2$  Hz, 2H) 7.38 (t,  $J=7.4$  Hz, 2H), 7.15 (t,  $J=7.4$  Hz, 1H), 7.09 (t,  $J=8.0$  Hz, 4H), 2.64 (s, 3H).

$^{13}\text{C}$  NMR (100 MHz,  $\text{CDCl}_3$ ,  $\delta$  ppm): 197.72, 157.74, 156.66, 145.01, 135.51, 134.58, 129.83, 128.93, 128.57, 126.81, 123.66, 119.22, 118.91, 26.63.

HRMS (ESI) Calcd for  $\text{C}_{20}\text{H}_{12}\text{O}_2+\text{H}$  289.1230, Found 289.1229

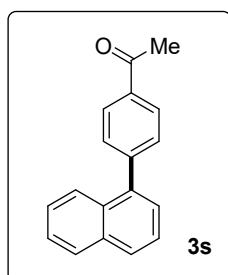

**1-(4-(naphthalen-1-yl)phenyl)ethan-1-one**

$^1\text{H}$  and  $^{13}\text{C}$  NMR were in agreement with the literature<sup>9</sup>

$\text{C}_{18}\text{H}_{14}\text{O}$  Melting Point :100.2 °C -101.2 °C

Melting Point were in agreement with the literature(96 °C -98 °C)

MW: 246.31  $\text{g}\cdot\text{mol}^{-1}$  White Solid Isolated amounts: 224.14 mg Yield: 91%

$^1\text{H}$  NMR (400 MHz,  $\text{CDCl}_3$ ,  $\delta$  ppm): 8.10 (d,  $J=7.6$  Hz, 2H), 7.92 (t,  $J=9.2$  Hz, 2H), 7.85 (d,  $J=8.4$  Hz, 1H), 7.61 (d,  $J=7.6$  Hz, 2H), 7.57-7.50 (m, 2H) ,7.45 (q,  $J=5.2$  Hz 2H), 2.69 (s, 3H)

$^{13}\text{C}$  NMR (100 MHz,  $\text{CDCl}_3$ ,  $\delta$  ppm): 197.90, 145.77, 138.97, 135.93, 133.74, , 131.15, 130.30, 128.40, 128.35, 128.33, 126.91, 126.36, 125.98, 125.54, 125.32, 26.74.

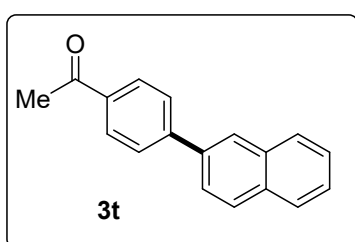

**1-(4-(naphthalen-2-yl)phenyl)ethan-1-one**

$^1\text{H}$  and  $^{13}\text{C}$  NMR were in agreement with the literature<sup>13</sup>

$\text{C}_{18}\text{H}_{14}\text{O}$  Melting Point :127. °C -130.7 °C

MW: 246.31  $\text{g}\cdot\text{mol}^{-1}$

White Solid

Isolated amounts: 221.70 mg

Yield: 90%

$^1\text{H}$  NMR (400 MHz,  $\text{CDCl}_3$ ,  $\delta$  ppm): 8.08 (d,  $J=9.2$  Hz, 2H), 7.96-7.88 (m, 3H) 7.82 (d,  $J=7.6$ Hz, 2H) 7.76 (d,  $J=8.4$ Hz, 1H) 7.56-7.50(m, 2H), 2.66 (s, 3H).

$^{13}\text{C}$  NMR (100 MHz,  $\text{CDCl}_3$ ,  $\delta$  ppm): 197.80, 145.64, 137.08, 135.78, 133.49, 132.96, 128.67, 128.31, 127.65, 127.42, 126.53, 126.46, 126.34, 125.13, 26.69.

HRMS (ESI) Calcd for  $\text{C}_{18}\text{H}_{14}\text{O}+\text{H}$  247.1128, Found 247.1123



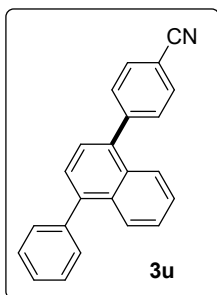

**4-(4-phenylnaphthalen-1-yl)benzonitrile**

**C<sub>23</sub>H<sub>15</sub>N** Melting Point :146.5 °C -148.0 °C

**MW: 305.38 g·mol<sup>-1</sup>** **Yellow Solid**

**Isolated amounts: 171.01 mg** **Yield: 56%**

**<sup>1</sup>H NMR (400 MHz, CDCl<sub>3</sub>, δ ppm):** 8.01-7.99 (m, 1H), 7.856-7.81(m, 3H), 7.67 (d, *J*=8.0 Hz, 2H), 7.53-7.44(m, 9H),

**<sup>13</sup>C NMR (100 MHz, CDCl<sub>3</sub>, δ ppm):** 145.69, 140.97, 140.31, 137.65, 133.37, 132.60, 132.14, 131.91, 131.22, 130.84, 130.00, 128.35, 127.49, 126.67, 126.52, 126.42, 126.33, 126.20, 125.50, 118.92, 111.09

**HRMS (ESI) Calcd for C<sub>23</sub>H<sub>15</sub>N+H 306.1286, Found 306.1283**

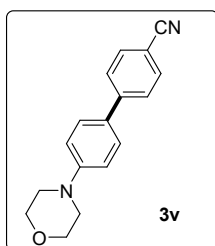

**4'-morpholino-[1,1'-biphenyl]-4-carbonitrile**

**C<sub>17</sub>H<sub>16</sub>N<sub>2</sub>O** Melting Point :183.6 °C -187.0 °C

**MW: 264.33 g·mol<sup>-1</sup>** **Grey Solid**

**Isolated amounts: 162.24mg** **Yield: 61%**

**<sup>1</sup>H NMR (400 MHz, CDCl<sub>3</sub>, δ ppm):** 7.65 (q, *J* =6.8 Hz, 4H), 7.53 (q, *J* =7.6 Hz, 2H), 6.99 (d, *J* =7.6 Hz, 2H), 3.88 (s, 4H), 3.24(s,4H).

**<sup>13</sup>C NMR (100 MHz, CDCl<sub>3</sub>, δ ppm):** 151.40, 145.07, 132.49, 129.80, 127.90, 126.68, 119.16, 115.44, 109.64, 66.69, 48.54.

**HRMS (ESI) Calcd for C<sub>17</sub>H<sub>16</sub>N+H 265.1340, Found 265.1341**

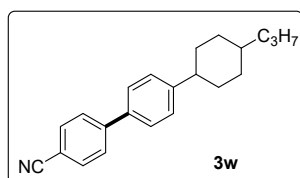

**4'-(4-propylcyclohexyl)-[1,1'-biphenyl]-4-carbonitrile**

**C<sub>22</sub>H<sub>25</sub>N** Melting Point :127.8.0 °C -130.5 °C

**MW: 303.45g·mol<sup>-1</sup>** **White Solid**

**Isolated amounts: 267.03 mg** **Yield: 88%**

**<sup>1</sup>H NMR (400 MHz, CDCl<sub>3</sub>, δ ppm):** 7.69 (q, *J*=6.8 Hz, 4H), 7.53(d, *J*=7.2 Hz, 2H), 7.33(d, *J* =7.2 Hz, 2H), 2.54 (t, *J* =12 Hz, 1H), 1.92 (t, *J* =13.2 Hz, 4H), 1.49 (q, *J* =12.4 Hz, 2H), 1.40-1.33(m, 3H), 1.24 (q, *J* =7.6 Hz, 2H), 1.08 (q, *J* =12 Hz, 2H),

0.92 (t,  $J=7.0$  Hz, 3H).

**$^{13}\text{C}$  NMR (100 MHz,  $\text{CDCl}_3$ ,  $\delta$  ppm):** 148.67, 145.54, 136.54, 132.49, 127.58, 127.42, 127.06, 119.02, 110.42, 44.29, 39.64, 36.93, 34.21, 33.44, 20.00, 14.39.

**HRMS (ESI)** Calcd for  $\text{C}_{22}\text{H}_{25}\text{N}+\text{H}$  304.2060, Found 304.2065

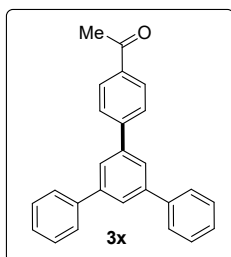

**1-(5'-phenyl-[1,1':3,1''-terphenyl]-4-yl)ethan-1-one**

**$\text{C}_{26}\text{H}_{20}\text{O}$  Melting Point :**143.6 °C -145.3 °C

**MW:** 348.45  $\text{g}\cdot\text{mol}^{-1}$

**White Solid**

**Isolated amounts:** 233.46 mg

**Yield:** 67%

**$^1\text{H}$  NMR (400 MHz,  $\text{CDCl}_3$ ,  $\delta$  ppm):** 8.08 (d,  $J=7.2$  Hz, 2H), 7.84 (s, 1H), 7.80 (d,  $J=8.0$  Hz, 4H), 7.71 (d,  $J=7.6$  Hz, 4H), 7.51 (t,  $J=7.4$  Hz, 4H), 7.42 (d,  $J=7.2$  Hz, 2H), 2.67 (s, 3H).

**$^{13}\text{C}$  NMR (100 MHz,  $\text{CDCl}_3$ ,  $\delta$  ppm):** 197.73, 145.64, 142.57, 140.96, 140.80, 136.02, 128.96, 128.89, 127.70, 127.42, 127.31, 136.06, 125.16, 26.70.

**HRMS (ESI)** Calcd for  $\text{C}_{26}\text{H}_{20}\text{O} +\text{H}$  349.1595, Found 349.1592

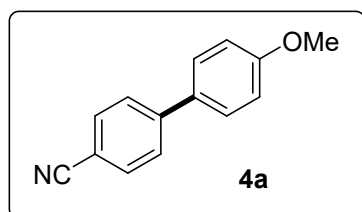

**4'-methoxy-[1,1'-biphenyl]-4-carbonitrile**

**$\text{C}_{14}\text{H}_{11}\text{NO}$  Melting Point :**103.1 °C -104.1 °C

**MW:** 209.25  $\text{g}\cdot\text{mol}^{-1}$

**White Solid**

**Isolated amounts:** 192.51 mg

**Yield:** 92%

**$^1\text{H}$  NMR (400 MHz,  $\text{CDCl}_3$ ,  $\delta$  ppm):**7.66 (d,  $J=7.6$  Hz, 2H), 7.61 (d,  $J=7.6$  Hz, 2H), 7.53 (d,  $J=8.0$  Hz, 2H), 7.00 (d,  $J=7.6$  Hz, 2H), 3.85 (s, 3H).

**$^{13}\text{C}$  NMR (100 MHz,  $\text{CDCl}_3$ ,  $\delta$  ppm):**160.02, 144.95, 132.37, 131.20, 128.17, 126.88, 118.96, 114.36, 109.84, 55.21

**HRMS (ESI)** Calcd for  $\text{C}_{14}\text{H}_{11}\text{NO} +\text{H}$  210.0917, Found 210.0919

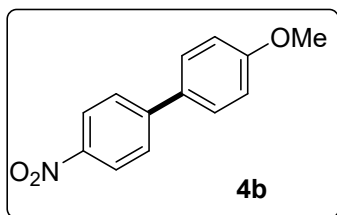

**4-methoxy-4'-nitro-1,1'-biphenyl**

$C_{13}H_{11}NO_3$  Melting Point :103.6 °C -104.3 °C

MW: 229.24 g·mol

**Yellow Solid**

Isolated amounts: 164.71 mg

**Yield: 64%**

$^1H$  NMR (400 MHz,  $CDCl_3$ ,  $\delta$  ppm):8.27 (d,  $J=8.0$  Hz, 2H), 7.69 (d,  $J=8.0$  Hz, 2H), 7.58 (d,  $J=8.0$  Hz, 2H), 7.02 (d,  $J=7.6$  Hz, 2H), 3.88 (s, 3H),

$^{13}C$  NMR (100 MHz,  $CDCl_3$ ,  $\delta$  ppm):160.38, 147.15, 146.46, 131.00, 128.53, 127.02, 124.11, 114.55, 55.39.

**HRMS (ESI)** Calcd for  $C_{13}H_{11}NO_3+H$ 230.0817, Found 230.0817

**4'-methoxy-[1,1'-biphenyl]-4-carbaldehyde**

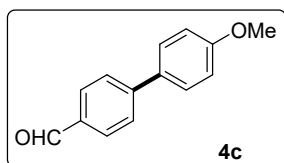

$^1H$  and  $^{13}C$  NMR were in agreement with the literature<sup>14</sup>

$C_{14}H_{12}O_2$  Melting Point :102.1 °C -102.4 °C

Melting Point were in agreement with the literature<sup>14</sup> (101 °C -102 °C)

MW: 212.25 g·mol<sup>-1</sup> **White Solid** Isolated amounts: 199.52 mg **Yield: 94%**

$^1H$  NMR (400 MHz,  $CDCl_3$ ,  $\delta$  ppm):10.02, (s, 1H), 7.91 (d,  $J=7.6$  Hz, 2H), 7.70(d,  $J=7.6$  Hz, 2H), 7.58 (d,  $J=7.6$ Hz, 2H), 7.00 (d,  $J=7.6$  Hz, 2H), 3.85 (s, 3H).

$^{13}C$  NMR (100 MHz,  $CDCl_3$ ,  $\delta$  ppm):191.84, 160.00, 146.66, 134.54, 131.90, 130.23, 128.41, 126.94, 114.38, 55.30.

**4-chloro-4'-methoxy-1,1'-biphenyl**

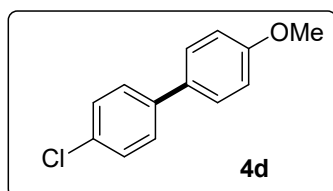

$^1H$  and  $^{13}C$  NMR were in agreement with the literature<sup>15</sup>

$C_{13}H_{11}ClO$  Melting Point :113.8 °C -114.4 °C

MW: 218.68 g·mol<sup>-1</sup> **White Solid** Isolated amounts: 194.63 mg **Yield: 89%**

$^1H$  NMR (400 MHz,  $CDCl_3$ ,  $\delta$  ppm):7.46 (d,  $J=7.0$  Hz, 4H), 7.36(d,  $J=7.6$  Hz, 2H), 6.96 (d,  $J=7.6$  Hz, 2H), 3.83 (s, 3H).

<sup>13</sup>C NMR (100 MHz, CDCl<sub>3</sub>, δ ppm):159.29, 139.19, 132.60, 132.40, 128.79, 127.96, 127.88, 114.25, 55.31.

---

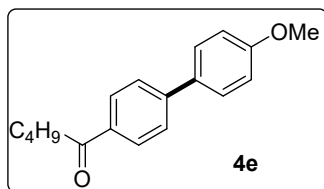

**1-(4'-methoxy-[1,1'-biphenyl]-4-yl)pentan-1-one**  
<sup>1</sup>H and <sup>13</sup>C NMR were in agreement with the literature<sup>16</sup>

**C<sub>18</sub>H<sub>20</sub>O<sub>2</sub> Melting Point :119.4 °C -119.9 °C**

**Melting Point were in agreement with the literature<sup>15</sup> (121 °C -124 °C)**

**MW: 268.36 g·mol<sup>-1</sup> White Solid Isolated amounts:214.52 mg Yield: 90%**

<sup>1</sup>H NMR (400 MHz, CDCl<sub>3</sub>, δ ppm): 7.99 (d, *J*=7.6Hz, 2H), 7.61 (d, *J*=8.0, 2H), 7.55 (d, *J* = 7.6 Hz, 2H), 6.98 (d, *J*=7.6 Hz, 2H), 3.83 (s, 3H), 2.96 (t, *J*=7.6, 2H), 1.77-1.69 (m, 2H), 1.46-1.37 (m 2H), 0.96, (t, *J*=7.4, 3H),

<sup>13</sup>C NMR (100 MHz, CDCl<sub>3</sub>, δ ppm):199.98, 159.74, 144.94, 135.04, 132.11, 128.57, 128.20, 126.43,114.26, 55.22, 38.22, 26.48, 22.43, 13.90.

---

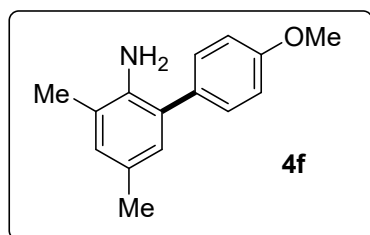

**4'-methoxy-3,5-dimethyl-[1,1'-biphenyl]-2-amine**

**C<sub>15</sub>H<sub>17</sub>NO Melting Point :66.1 °C -68.2 °C**

**MW: 227.31 g·mol<sup>-1</sup> Brown Solid**

**Isolated amounts: 170.48 mg Yield: 75%**

<sup>1</sup>H NMR (400 MHz, CDCl<sub>3</sub>, δ ppm):7.34 (d, *J*=7.6 Hz, 2H), 6.95 (d, *J*=7.6 Hz, 2H), 6.86 (s,1 H) ,6.08 (s,1H) 3.81 (s, 3H), 3.51 (s, 2H), 2.24, (s, 3H), 2.17 (s, 3H).

<sup>13</sup>C NMR (100 MHz, CDCl<sub>3</sub>, δ ppm):158.53, 139.14, 132.08, 130.18, 128.66, 127.04, 122.48, 114.02, 55.15, 20.30, 17.79 .

**HRMS (ESI) Calcd for C<sub>15</sub>H<sub>17</sub>NO +H 228.1392, Found 228.1388**

---

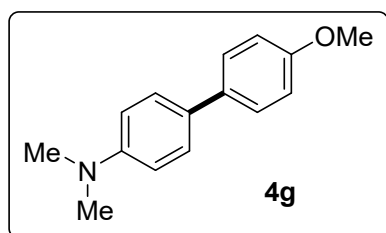

**4'-methoxy-N,N-dimethyl-[1,1'-biphenyl]-4-amine**  
<sup>1</sup>H and <sup>13</sup>C NMR were in agreement with the literature<sup>17</sup>

**C<sub>15</sub>H<sub>17</sub>NO Melting Point :151.5 °C -153.1 °C**

**MW: 227.31 g·mol<sup>-1</sup> Brown Solid**

---

**Isolated amounts:** 163.66 mg

**Yield:** 72%

**<sup>1</sup>H NMR (400 MHz, CDCl<sub>3</sub>, δ ppm)** 7.48(t, *J* = 9.2 Hz, 4H), 6.94 (d, *J* = 8.0 Hz, 2H), 6.79 (d, *J* = 8.0 Hz, 2H), 3.83 (s, 3H), 2.97 (s, 6H)

**<sup>13</sup>C NMR (100 MHz, CDCl<sub>3</sub>, δ ppm):**158.20, 149.56, 133.92, 129.11, 127.28, 114.07, 112.88, 55.31, 40.66.

---

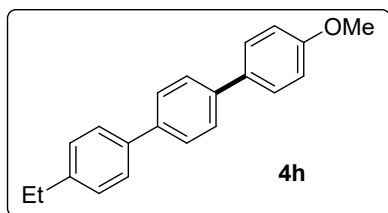

**4-ethyl-4''-methoxy-1,1':4',1''-terphenyl**

**<sup>1</sup>H and <sup>13</sup>C NMR were in agreement with the literature<sup>18</sup>**

**C<sub>21</sub>H<sub>20</sub>O** **Melting Point :**233.9 °C -235.8 °C **MW:**  
288.39 g·mol<sup>-1</sup> **White Solid**

**Isolated amounts:** 236.48 mg

**Yield:** 82%

**<sup>1</sup>H NMR (400 MHz, CDCl<sub>3</sub>, δ ppm):**7.64 (t, *J* = 9.6 Hz, 4H), 7.58 (t, *J* = 6.4 Hz, 4H), 7.30 (d, *J* = 7.6 Hz, 2H), 7.00 (d, *J* = 8.0 Hz, 2H), 3.87 (s, 3H), 2.72 (q, *J* = 7.6 Hz, 2H), 1.30 (t, *J* = 7.8 Hz, 3H).

**<sup>13</sup>C NMR (100 MHz, CDCl<sub>3</sub>, δ ppm):**159.13, 143.37, 139.43, 139.40, 138.10, 133.26, 128.30, 128.00, 127.27, 126.97, 126.88, 114.21, 55.34, 28.52, 15.59 .

---

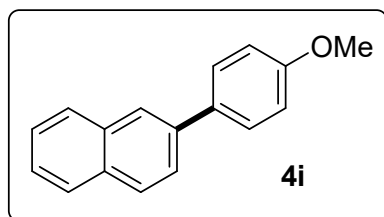

**2-(4-methoxyphenyl)naphthalene**

**<sup>1</sup>H and <sup>13</sup>C NMR were in agreement with the literature<sup>19</sup>**

**C<sub>17</sub>H<sub>14</sub>O** **Melting Point :**136.3 °C -136.8 °C

**MW:** 234.30 g·mol<sup>-1</sup>

**White Solid**

**Isolated amounts:** 217.90 mg

**Yield:** 93%

**<sup>1</sup>H NMR (400 MHz, CDCl<sub>3</sub>, δ ppm):**8.02, (s, 1H), 7.90 (q, *J* = 6.4 Hz, 2H), 7.75(d, *J* = 8.8 Hz, 1H), 7.69 (d, *J* = 7.6 Hz, 2H), 7.54-7.47 (m, 2H), 7.05 (d, *J* = 7.6 Hz, 2H) 3.89 (s, 3H).

**<sup>13</sup>C NMR (100 MHz, CDCl<sub>3</sub>, δ ppm):**159.17, 138.07, 13.69, 133.54, 132.24, 128.37, 128.30, 128.01, 127.58, 126.19, 125.60, 125.38, 124.97, 114.25, 55.32.

---

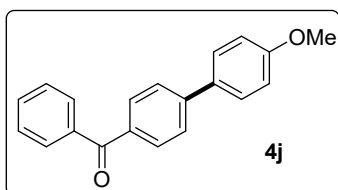

**(4'-methoxy-[1,1'-biphenyl]-4-yl)(phenyl)methanone**

<sup>1</sup>H and <sup>13</sup>C NMR were in agreement with the literature<sup>20</sup>

**C<sub>20</sub>H<sub>16</sub>O<sub>2</sub> Melting Point :158.9 °C -163.8 °C**

**Melting Point were in agreement with the literature<sup>20</sup>**

(158.4 °C -162.7 °C)

**MW: 288.35 g·mol<sup>-1</sup> Brown Solid Isolated amounts: 242.21 mg Yield: 84%**

**<sup>1</sup>H NMR (400 MHz, CDCl<sub>3</sub>, δ ppm):**7.88 (d, *J* = 7.6 Hz, 2H), 7.84 (d, *J* = 7.6 Hz, 2H), 7.67 (d, *J* = 7.6 Hz, 2H), 7.61 (d, *J* = 7.6 Hz, 2H) 7.50 (t, *J* = 7.2 Hz, 2H), 7.02 (d, *J* = 8.0 Hz, 2H), 3.87 (s, 3H).

**<sup>13</sup>C NMR (100 MHz, CDCl<sub>3</sub>, δ ppm):**183.32, 159.82, 144.80, 137.80, 135.51, 132.26, 130.77, 129.93, 128.35, 128.24, 126.32, 114.37, 55.35.

---

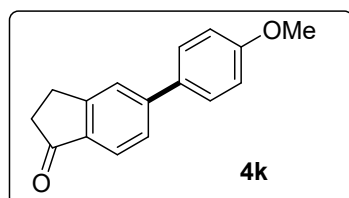

**5-(4-methoxyphenyl)-2,3-dihydro-1H-inden-1-one**

<sup>1</sup>H and <sup>13</sup>C NMR were in agreement with the literature<sup>21</sup>

**C<sub>16</sub>H<sub>14</sub>O<sub>2</sub> Melting Point : 151.0 °C -151.6 °C**

**MW: 238.39 g·mol<sup>-1</sup> Yellow Solid Isolated amounts: 202.63 mg Yield: 85%**

**<sup>1</sup>H NMR (400 MHz, CDCl<sub>3</sub>, δ ppm):**7.78 (d, *J* = 8.0 Hz, 1H), 7.61 (s, 1H), 7.56 (t, *J* = 7.6 Hz, 3H), 6.99 (d, *J* = 7.6 Hz, 2H), 3.85 (s, 3H) 3.16 (t, *J* = 5 Hz, 2H), 2.71 (t, *J* = 5 Hz, 2H).

**<sup>13</sup>C NMR (100 MHz, CDCl<sub>3</sub>, δ ppm):**206.52, 159.88, 155.88, 147.14, 135.32, 132.40, 128.49, 126.13, 124.35, 123.94, 114.30, 55.30, 36.44, 25.78

**HRMS (ESI) Calcd for C<sub>16</sub>H<sub>14</sub>O<sub>2</sub>+H 239.1076, Found 239.1072**

---

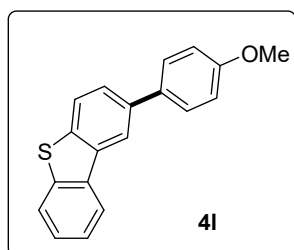

**2-(4-methoxyphenyl)dibenzo[b,d]thiophene**

**C<sub>19</sub>H<sub>14</sub>OS** Melting Point :92.9 °C -95.2 °C

**MW: 290.38 g·mol<sup>-1</sup>**

**Brown Solid**

**Isolated amounts: 209.07 mg**

**Yield: 72%**

**<sup>1</sup>H NMR (400 MHz, CDCl<sub>3</sub>, δ ppm):**8.35 (s, 1H), 8.25-8.23 (m, 1H), 7.90 (d, *J* =8.4Hz, 2H), 7.68(d, *J*=8.4Hz, 3H), 7.52-7.50 (m, 2H), 7.07 (d, *J* = 7.6 Hz, 2H), 3.90 (s, 3H).

**<sup>13</sup>C NMR (100 MHz, CDCl<sub>3</sub>, δ ppm):**159.02, 139.79, 137.71, 137.34, 125.95, 135.44, 133.49, 128.22, 126.67, 125.74, 124.25, 122.81, 122.77, 121.49, 119.36, 114.18, 55.2

**HRMS (ESI) Calcd for C<sub>19</sub>H<sub>14</sub>OS +H 291.0841 , Found 291.0841**

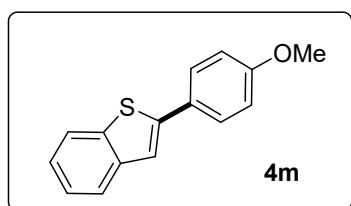

**2-(4-methoxyphenyl)benzo[b]thiophene**

**<sup>1</sup>H and <sup>13</sup>C NMR were in agreement with the literature<sup>22</sup>**

**C<sub>15</sub>H<sub>12</sub>OS** Melting Point :191.2 °C -192.1 °C

**MW: 240.32 g·mol<sup>-1</sup>**

**White Solid**

**Isolated amounts: 180.24 mg**

**Yield: 75%**

**<sup>1</sup>H NMR (400 MHz, CDCl<sub>3</sub>, δ ppm):** 7.80 (d, *J* =7.6, 1H), 7.74 (d, *J* = 8.0 Hz, 1H), 7.64 (d, *J* =7.6 Hz, 2H), 7.43(s, 1H), 7.35-7.25 (m, 2H), 6.96 (d, *J*=8 Hz, 2H), 3.85 (s,3H).

**<sup>13</sup>C NMR (100 MHz, CDCl<sub>3</sub>, δ ppm):**159.74, 144.10, 140.85, 139.13, 127.71, 127.00, 124.42, 123.91, 123.22, 122.15, 118.16, 114.31, 55.38.

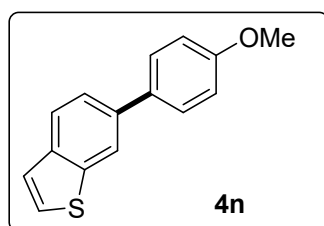

**6-(4-methoxyphenyl)benzo[b]thiophene**

**C<sub>15</sub>H<sub>12</sub>OS** Melting Point :134.8 °C -137.2 °C

**MW: 240.32 g·mol<sup>-1</sup>**

**White Solid**

**Isolated amounts: 213.78 mg**

**Yield: 89%**

**<sup>1</sup>H NMR (400 MHz, CDCl<sub>3</sub>, δ ppm):** 7.99 (s, 1H), 7.92 (d, *J*=8.4 Hz, 1H), 7.61 (d, *J*=8.0 Hz, 2H), 7.57 (d, *J*=8.4 Hz, 1H), 7.48 (d, *J*=5.2Hz, 1H), 7.38 (d, *J*=5.2Hz, 1H), 7.02 (d, *J*=8.0 Hz, 2H), 3.88 (s, 3H).

**<sup>13</sup>C NMR (100 MHz, CDCl<sub>3</sub>, δ ppm):**159.00, 140.18, 138.15, 137.28, 133.82, 128.36, 126.92, 123.99, 123.65, 122.61, 121.45, 114.21, 55.34.

**HRMS (ESI)** Calcd for C<sub>15</sub>H<sub>12</sub>OS +H 241.0688, Found 241.0687

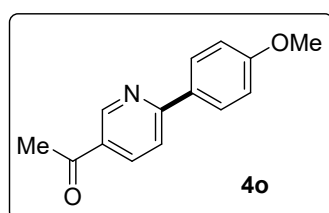

**1-(6-(4-methoxyphenyl)pyridin-3-yl)ethan-1-one**

**C<sub>14</sub>H<sub>13</sub>NO<sub>2</sub> Melting Point :**137.2 °C -138.5 °C

**MW:** 227.26 g·mol<sup>-1</sup>

**White Solid**

**Isolated amounts:** 106.81 mg

**Yield:** 47%

**<sup>1</sup>H NMR (400 MHz, CDCl<sub>3</sub>, δ ppm):**9.18 (s, 1H), 8.24 (d, *J* =8.4 Hz, 1H), 8.04(d, *J*=8.0 Hz, 2H), 7.77 (d, *J* =8.4Hz, 2H),7.01(d, *J* =8.0 Hz, 2H), 3.88 (s, 3H).2.64 (s, 3H).

**<sup>13</sup>C NMR (100 MHz, CDCl<sub>3</sub>, δ ppm):**196.47, 161.33, 160.50, 150.10, 136.25, 130.62, 129.88, 128.78, 119.18, 114.27, 55.38, 26.66

**HRMS (ESI)** Calcd for C<sub>14</sub>H<sub>13</sub>NO<sub>2</sub> +H 228.1027, Found228.1025

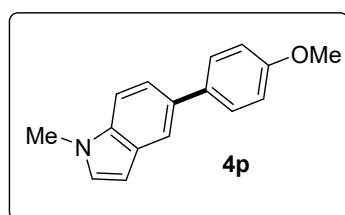

**5-(4-methoxyphenyl)-1-methyl-1H-indole**

**C<sub>16</sub>H<sub>15</sub>NO Melting Point :**140.3 °C -142.0 °C

**MW:** 237.30 g·mol<sup>-1</sup>

**Yellow Solid**

**Isolated amounts:** 132.89 mg

**Yield:** 56%

**<sup>1</sup>H NMR (400 MHz, CDCl<sub>3</sub>, δ ppm):**7.88, (s, 1H), 7.66 (d, *J* =7.6Hz, 2H), 7.52 (d, *J*=8.4 Hz, 1H), 7.42 (d, *J* = 8.8 Hz, 1H), 7.12 (s, 1 H),7.06 (d, *J*=7.6 Hz, 2H), 6.60 (s, 1 H), 3.91 (s, 3 H), 3.83 (s, 3 H).

**<sup>13</sup>C NMR (100 MHz, CDCl<sub>3</sub>, δ ppm):**158.33, 135.86, 135.16, 132.39, 129.33, 128.87, 128.22, 121.08. 118.78, 114.01, 109.32, 101.08, 55.25, 32.80.

**HRMS (ESI)** Calcd for C<sub>16</sub>H<sub>15</sub>NO +H 283.1233 , Found 283.1232



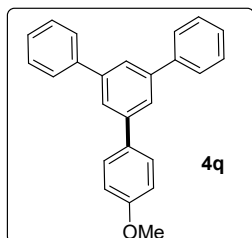

**4-methoxy-5'-phenyl-1,1':3',1''-terphenyl**

<sup>1</sup>H and <sup>13</sup>C NMR were in agreement with the literature<sup>23</sup>

**C<sub>25</sub>H<sub>20</sub>O** Melting Point :134.0 °C -135.3 °C

Melting Point were in agreement with the literature<sup>20</sup>

(133 °C–134 °C)

**MW:** 336.43 g·mol<sup>-1</sup> **White Solid** **Isolated amounts:** 272.51 mg **Yield:** 81%

<sup>1</sup>H NMR (400 MHz, CDCl<sub>3</sub>, δ ppm):7.81 (s, 3H) 7.75 (d, *J*=7.6 Hz, 4H), 7.69 (d, *J*=7.6 Hz, 2H), 7.53 (t, *J*=7.4 Hz, 4H), 7.44 (t, *J*=7.2 Hz, 2H), 7.07(d, *J*=7.6 Hz, 2H), 3.90 (s, 3H).

<sup>13</sup>C NMR (100 MHz, CDCl<sub>3</sub>, δ ppm):159.29, 142.25, 141.85, 141.17, 133.54, 128.78, 127.48, 127.31, 124.71, 124.58, 114.22, 55.30.

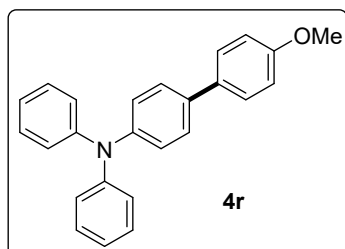

**4'-methoxy-N,N-diphenyl-[1,1'-biphenyl]-4-amine**

<sup>1</sup>H and <sup>13</sup>C NMR were in agreement with the literature<sup>24</sup>

**C<sub>25</sub>H<sub>21</sub>NO** Melting Point :129.2 °C -130.4 °C

**MW:** 351.45 g·mol<sup>-1</sup>

**Green Solid**

**Isolated amounts:** 224.93 mg

**Yield:** 64%

<sup>1</sup>H NMR (400 MHz, CDCl<sub>3</sub>, δ ppm):7.49 (d, *J*= 7.6 Hz, 2H ), 7.42 (d, *J*= 7.6 Hz, 2H ), 7.24(t, *J*= 6.6 Hz, 4H), 7.11(d, *J*= 8.0 Hz, 6H), 7.00 (t, *J*= 7.4 Hz, 2H), 6.94 (d, *J*= 8.0 Hz, 2H), 3.82 (s, 3H).

<sup>13</sup>C NMR (100 MHz, CDCl<sub>3</sub>, δ ppm):158.74, 147.69, 146.52, 134.92, 133.18, 129.20, 127.63, 127.29, 124.17, 122.70, 114.12, 55.28.

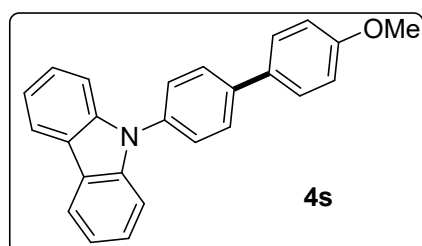

**9-(4'-methoxy-[1,1'-biphenyl]-4-yl)-9H-carbazole**

**C<sub>25</sub>H<sub>19</sub>NO** Melting Point :262.6 °C -263.1 °C

**MW:** 349.43 g·mol<sup>-1</sup>

**Brown Solid**

**Isolated amounts:** 251.59mg      **Yield:** 72%

**<sup>1</sup>H NMR (400 MHz, CDCl<sub>3</sub>, δ ppm):** 8.17 (d, *J*=8.0 Hz, 2H), 7.78 (d, *J* = 7.2 Hz, 2H), 7.63 (t, *J* =8.0 Hz, 4H), 7.49-7.41(m, 4H), 7.31 (t, *J* =7.2 Hz, 2H), 7.05(d, *J* =7.6Hz, 2H), 3.90 (s,3H).

**<sup>13</sup>C NMR (100 MHz, CDCl<sub>3</sub>, δ ppm):**159.37, 140.84, 139.89, 136.19, 132.74, 128.15, 127.98, 127.29, 125.90, 123.32, 120.28, 119.87, 114.35, 55.37 .

**HRMS (ESI)** Calcd for C<sub>25</sub>H<sub>19</sub>NO+H 350.1548, Found 350.1545

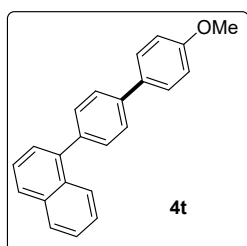

**1-(4'-methoxy-[1,1'-biphenyl]-4-yl)naphthalene**

**C<sub>23</sub>H<sub>18</sub>O**      **Melting Point :**122.7 °C -123.0 °C

**MW:** 310.40 g·mol<sup>-1</sup>

**White Solid**

**Isolated amounts:** 192.45 mg

**Yield:** 62%

**<sup>1</sup>H NMR (400 MHz, CDCl<sub>3</sub>, δ ppm):**8.01 (d, *J*=8.4 Hz, 1H), 7.94 (q, *J*=8.0 Hz, 1H), 7.89(d, *J* =8.0Hz, 1H), 7.70 (d, *J*=7.6 Hz, 2H),7.65(d, *J* =7.6 Hz, 2H), 7.59-7.45 (m, 6 H), 7.04 (d, *J* =7.6 Hz, 2H) 3.89 (s, 3H).

**<sup>13</sup>C NMR (100 MHz, CDCl<sub>3</sub>, δ ppm):**159.18, 139.88, 139.66, 139.06, 133.79, 133.29, 131.57, 130.44, 128.27, 128.11, 127.61, 126.90, 126.51, 126.02, 125.77, 125.40, 114.25, 55.34.

**HRMS (ESI)** Calcd for C<sub>23</sub>H<sub>18</sub>O+H 311.3435, Found 311.3436

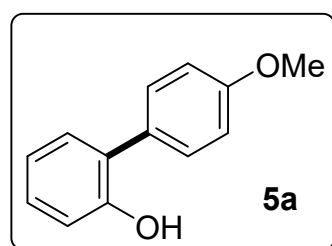

**4'-methoxy-[1,1'-biphenyl]-2-ol**

**<sup>1</sup>H and <sup>13</sup>C NMR were in agreement with the literature<sup>25</sup>**

**C<sub>13</sub>H<sub>12</sub>O<sub>2</sub>**

**Melting Point :** 63.8 °C -64.2 °C

**Melting Point were in agreement with the literature<sup>25</sup>**

**(66 °C -67 °C)**

**MW:** 200.34 g·mol<sup>-1</sup>      **Colorless prisms**      **Isolated amounts:**144.24 mg      **Yield:** 72%

**<sup>1</sup>H NMR (400 MHz, CDCl<sub>3</sub>, δ ppm):**7.37 (d, *J* =7.6 Hz, 2H), 7.21(d, *J* =10.8 Hz, 2H), 6.96 (q, *J* =6.4 Hz, 2H), 5.36 (s, 1H). 3.80 (s, 3H).

**<sup>13</sup>C NMR (100 MHz, CDCl<sub>3</sub>, δ ppm):**159.07, 152.40, 130.20, 130.17, 129.19,

128.68, 127.76, 120.70, 115.63, 114.51, 55.23

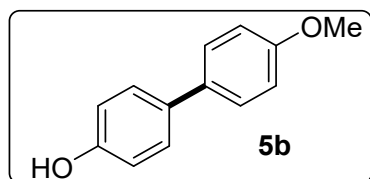

**4'-methoxy-[1,1'-biphenyl]-4-ol**

**<sup>1</sup>H and <sup>13</sup>C NMR were in agreement with the literature<sup>26</sup>**

**C<sub>13</sub>H<sub>12</sub>O<sub>2</sub> Melting Point :169.6 °C -170.4 °C**

**MW: 200.34 g·mol<sup>-1</sup> White Solid**

**Isolated amounts: 152.26 mg Yield: 76%**

**<sup>1</sup>H NMR (400 MHz, DMSO d-6, δ ppm):**9.47 (s, 1H), 7.49(d, *J* =7.6 Hz, 2H),7.42 (d, *J* =7.6 Hz, 2H), 6.97(d, *J* =7.6 Hz, 2H), 6.83 (d, *J* =7.6 Hz, 2H), 3.77 (s, 3H).

**<sup>13</sup>C NMR (100 MHz, DMSO d-6 δ ppm):**158.54, 156.97, 133.20, 131.18, 127.68  
127.46, 116.09, 114.67, 55.54

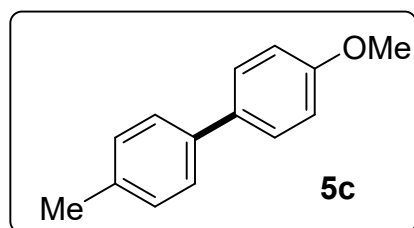

**4-methoxy-4'-methyl-1,1'-biphenyl**

**<sup>1</sup>H and <sup>13</sup>C NMR were in agreement with the literature<sup>5</sup>.**

**C<sub>14</sub>H<sub>14</sub>O Melting Point :107.0 °C -107.7 °C**

**MW: 198.27 g·mol<sup>-1</sup> White Solid**

**Isolated amounts: 109.05 mg Yield: 55%**

**<sup>1</sup>H NMR (400 MHz, CDCl<sub>3</sub>, δ ppm):**7.51 (d, *J* =7.2 Hz, 2H), 7.45(d, *J* =7.6 Hz, 2H),  
7.22(d, *J* =7.2Hz, 2H), 6.96 (d, *J* =7.6 HZ, 2H), 3.84 (s, 3H), 2.38 (s, 3H).

**<sup>13</sup>C NMR (100 MHz, CDCl<sub>3</sub>, δ ppm):**158.86, 137.91, 136.32, 133.69, 129.40,  
127.92,126.55, 114.10, 55.31, 21.04.

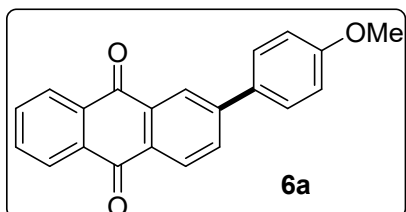

**2-(4-methoxyphenyl)-4a,9a-dihydroanthracene-9,10-dione**

**<sup>1</sup>H and <sup>13</sup>C NMR were in agreement with the literature<sup>27</sup>**

**C<sub>21</sub>H<sub>15</sub>O<sub>3</sub> Melting Point :175.8 °C -176.7 °C**

**MW: 314.34 g·mol<sup>-1</sup> Yellow Solid**

**Isolated amounts: 298.62 mg Yield: 95%**

**<sup>1</sup>H NMR (400 MHz, CDCl<sub>3</sub>, δ ppm):**8.48 (s, 1H), 8.33 (d, *J* = 7.2 Hz, 3H), 7.97 (d, *J*

= 8.0 Hz, 1H), 7.81-7.80 (m, 2H), 7.69 (d,  $J = 8.0$  Hz, 2H), 7.03 (d,  $J = 8.4$  Hz, 2H), 3.88 (s, 3H).

**$^{13}\text{C}$  NMR (100 MHz,  $\text{CDCl}_3$ ,  $\delta$  ppm):**183.32, 182.83, 160.36, 146.37, 134.12, 133.95, 133.84, 133.64, 133.57, 131.66, 131.51, 131.21, 128.48, 128.03, 127.22, 127.15, 124.79, 114.54, 55.40

**HRMS (ESI)** Calcd for  $\text{C}_{21}\text{H}_{15}\text{O}_3+\text{H}$  315.1025, Found 315.1021

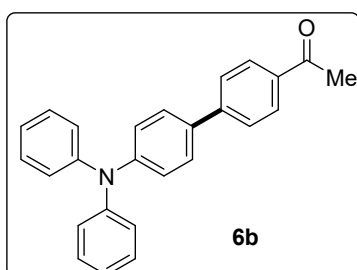

**1-(4'-(diphenylamino)-[1,1'-biphenyl]-4-yl)ethan-1-one**

**$^1\text{H}$  and  $^{13}\text{C}$  NMR were in agreement with the literature<sup>13</sup>**

**$\text{C}_{26}\text{H}_{21}\text{NO}$  Melting Point :105.8 °C -106.3 °C**

**MW: 363.46  $\text{g}\cdot\text{mol}^{-1}$**

**Green Solid**

**Isolated amounts: 210.80 mg**

**Yield: 58%**

**$^1\text{H}$  NMR (400 MHz, DMSO,  $\delta$  ppm):** 7.91 (d,  $J = 8.0$  Hz, 2H), 7.56, (d,  $J = 7.6$  Hz, 2H), 7.41 (d,  $J = 8.0$  Hz, 2H), 7.19 (t,  $J = 7.4$  Hz, 4H), 7.05(d,  $J = 8.4$  Hz, 6H), 6.97 (t,  $J = 7.2$  Hz, 2H), 2.53 (s, 3H).

**$^{13}\text{C}$  NMR (100 MHz, DMSO,  $\delta$  ppm):** 197.65, 148.09, 147.31, 145.11, 135.20, 133.01, 129.32, 128.91, 127.85, 126.41, 124.70, 123.29, 123.20, 26.60.

**HRMS (ESI)** Calcd for  $\text{C}_{26}\text{H}_{21}\text{NO}+\text{H}$  364.700, Found 364.1701

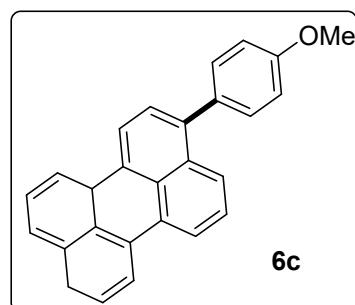

**9-(4-methoxyphenyl)-3,6a-dihydroperylene**

**$\text{C}_{27}\text{H}_{20}\text{O}$  Melting Point :255.3 °C -257.0 °C**

**MW: 360.46  $\text{g}\cdot\text{mol}^{-1}$**

**Yellow Solid**

**Isolated amounts: 273.95 mg**

**Yield: 76%**

**$^1\text{H}$  NMR (400 MHz,  $\text{CDCl}_3$ ,  $\delta$  ppm):**8.19 (t,  $J = 5.8$  Hz, 4H), 7.79 (d,  $J = 8.4$  Hz, 1H), 7.68(d,  $J = 8.0$ Hz, 2H), 7.50-7.39(m, 6H), 7.05(d,  $J = 8.0$ Hz, 2H), 3.90 (s, 3H).

**<sup>13</sup>C NMR (100 MHz, CDCl<sub>3</sub>, δ ppm):**158.96, 139.59, 134.65, 133.06, 131.41, 131.33, 131.26, 131.00, 130.26, 129.05, 128.60, 127.70, 127.67, 127.59, 126.57, 126.55, 126.37, 126.10, 120.28, 120.23, 119.96, 119.92, 113.78, 55.34.

**HRMS (ESI) Calcd for C<sub>27</sub>H<sub>20</sub>O+H** 361.1585, Found 361.1592

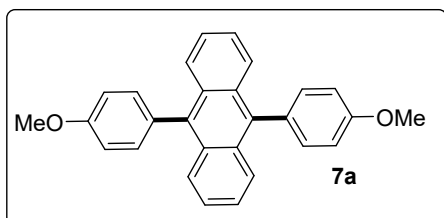

**9,10-bis(4-methoxyphenyl)anthracene**

**<sup>1</sup>H and <sup>13</sup>C NMR were in agreement with the literature<sup>28</sup>**

**C<sub>28</sub>H<sub>22</sub>O<sub>2</sub> Melting Point :277.9 °C -279.1 °C**

**MW: 390.48 g·mol<sup>-1</sup> Yellow Solid Isolated amounts: 144.0 mg Yield: 74%**

**<sup>1</sup>H NMR (400 MHz, CDCl<sub>3</sub>, δ ppm):**7.75-7.73(m, 4H), 7.39 (d, *J*=7.6 Hz, 4H), 7.33 (d, *J*=7.2 Hz, 4H), 7.14 (d, *J*=7.6 Hz, 4H), 3.96 (s, 6H).

**<sup>13</sup>C NMR (100 MHz, CDCl<sub>3</sub>, δ ppm):**159.26, 158.97, 140.46, 136.72, 132.37, 131.12, 130.23, 128.66, 127.56, 127.02, 124.87, 123.38, 113.83, 113.73, 55.38

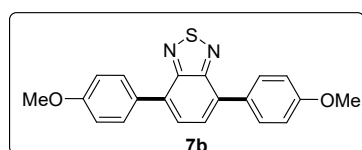

**4,7-bis(4-methoxyphenyl)benzo[c][1,2,5]thiadiazole**

**C<sub>20</sub>H<sub>18</sub>N<sub>2</sub>O<sub>5</sub> Melting Point :196.7 °C -197.0 °C**

**MW: 348.42 g·mol<sup>-1</sup>**

**Yellow Solid**

**Isolated amounts: 151.56 mg**

**Yield: 87%**

**<sup>1</sup>H NMR (400 MHz, CDCl<sub>3</sub>, δ ppm):**7.92(d, *J* =7.6 Hz, 4H), 7.71(s, 2H) 7.08 (d, *J* =7.6 Hz, 4H), 3.89 (s, 6H).

**<sup>13</sup>C NMR (100 MHz, CDCl<sub>3</sub>, δ ppm):**159.71, 154.16, 132.28, 130.34, 129.96, 127.37, 114.06, 55.38.

**HRMS (ESI) Calcd for C<sub>20</sub>H<sub>18</sub>N<sub>2</sub>O<sub>5</sub>+H** 349.1009, Found 349.1011

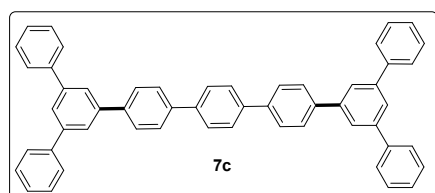

**5',5''''-diphenyl-**

**1,1':3',1''':4'',1''':4''',1''''':4''''',1''''':3''''',1''''''-sepiphenyl**

**C<sub>54</sub>H<sub>38</sub>**

**Melting Point :293.6 °C -297.2 °C**

MW: 686.90 g·mol<sup>-1</sup>

White Solid

Isolated amounts: 216.37 mg

Yield: 63%

<sup>1</sup>H NMR (400 MHz, CDCl<sub>3</sub>, δ ppm): 7.85 (s, 4H), 7.83-7.78 (m, 14H), 7.73(d, *J*=7.6 Hz, 2H), 7.50 (t, *J*=7.4 Hz, 8H), 7.41 (t, *J*=7.4 Hz, 4H),

<sup>13</sup>C NMR (100 MHz, CDCl<sub>3</sub>, δ ppm): 142.43, 141.77, 141.11, 140.12, 139.82, 139.64, 139.86, 127.77, 127.58, 127.48, 127.45, 127.36, 125.31, 125.03.

HRMS (ESI) Calcd for C<sub>54</sub>H<sub>38</sub>+H 687.3060, Found 687.3052

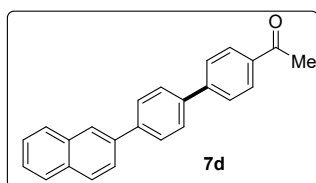

1-(4'-(naphthalen-2-yl)-[1,1'-biphenyl]-4-yl)ethan-1-one

C<sub>24</sub>H<sub>18</sub>O

Melting Point :228.7 °C -229.2 °C

MW: 322.41 g·mol<sup>-1</sup>

White Solid

Isolated amounts: 109.70 mg

Yield: 66%

<sup>1</sup>H NMR (400 MHz, CDCl<sub>3</sub>, δ ppm): 8.11( s, 1H), 8.07 ( d, *J*=7.6 Hz, 2H), 7.94, (t, *J*=9.2 Hz, 2 H),7.89 (d, *J*=7.2 Hz, 1H), 7.85 (d, *J*=7.6 Hz, 2H), 7.78 (t, *J*=10.6 Hz, 5 H), 7.55-7.49 (m,2H), 2.66( s , 3H).

<sup>13</sup>C NMR (100 MHz, CDCl<sub>3</sub>, δ ppm): 197.75, 145.21, 140.99, 138.73, 137.65, 135.86, 133.63, 132.72, 128.99, 128.57, 128.22, 127.91, 127.72, 127.66, 127.08, 126.41, 126.12, 125.80, 125.30, 26.71.

HRMS (ESI) Calcd for C<sub>24</sub>H<sub>18</sub>O+H 323.1436, Found 323.1436

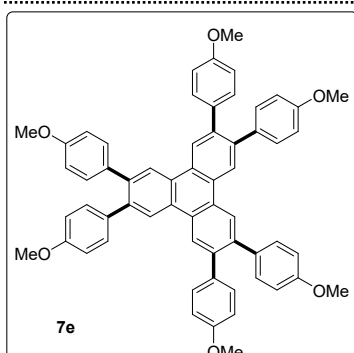

2,3,6,7,10,11-hexakis(4-methoxyphenyl)triphenylene

C<sub>60</sub>H<sub>48</sub>O<sub>6</sub>

Melting Point :259.0 °C -260.1 °C

MW: 865.04 g·mol<sup>-1</sup>

White Solid

Isolated amounts: 367.29 mg

Yield: 85%

<sup>1</sup>H NMR (400 MHz, DMSO d-6, δ ppm):8.71 (s, 5H), 7.27 (d, *J*=8.0 Hz, 12H), 6.89 (d, *J*=8.0 Hz, 12H), 3.77 (s, 18H).

**<sup>13</sup>C NMR (100 MHz, DMSO d-6, δ ppm):**158.64, 139.69, 133.74, 131.45, 128.45, 125.82, 114.06, 55.52

**HRMS (ESI)** Calcd for C<sub>60</sub>H<sub>48</sub>O<sub>6</sub>+H 865.3525, Found 865.3529

---

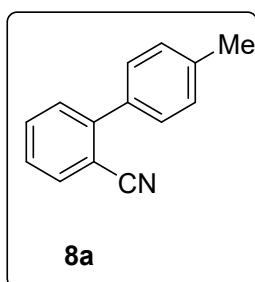

**4'-methyl-[1,1'-biphenyl]-2-carbonitrile**

**<sup>1</sup>H and <sup>13</sup>C NMR were in agreement with the literature<sup>29</sup>**

**C<sub>14</sub>H<sub>11</sub>N**

**MW:** 193.25 g·mol<sup>-1</sup> **White oil** **Isolated amounts:**

139.14 mg **Yield:** 72%

**<sup>1</sup>H NMR (400 MHz, CDCl<sub>3</sub>, δ ppm):**7.70 (d, *J*=7.6 Hz, 1H), 7.58 (t, *J*=7.6 Hz, 1H), 7.45 (t, *J*=8.2 Hz, 3H), 7.37(t, *J*=7.6Hz, 1H), 7.27(d, *J*=7.6 Hz, 2H), 2.38 (s, 3H)

**<sup>13</sup>C NMR (100 MHz, CDCl<sub>3</sub>, δ ppm):**145.22, 138.44, 135.04, 133.48, 132.61, 129.76, 129.23, 128.40, 127.10, 118.71, 110.87, 21.05.

---

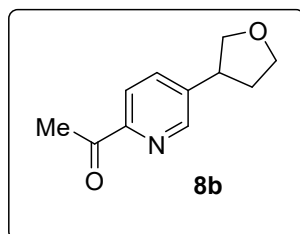

**1-(5-(tetrahydrofuran-3-yl)pyridin-2-yl)ethan-1-one**

**C<sub>11</sub>H<sub>13</sub>NO<sub>2</sub>** **Melting Point :**117.8 °C -118.9 °C

**MW:** 191.23 g·mol<sup>-1</sup> **Yellow Solid**

**Isolated amounts:** 120.47 mg **Yield:** 63%

**<sup>1</sup>H NMR (400 MHz, CDCl<sub>3</sub>, δ ppm):** 8.81 (s, 1H) 8.05 (d, *J*=10.4 Hz, 1H), 7.87 (d, *J*=8.0 Hz, 2H), 7.56 (s, 1H), 6.77(s, 1H), 2.73 (s, 3H)

**<sup>13</sup>C NMR (100 MHz, CDCl<sub>3</sub>, δ ppm):**199.42, 1551.80, 145.98, 144.44, 139.86, 133.19, 131.62, 122.61, 121.78, 108.20, 25.64.

**HRMS (ESI)** Calcd for C<sub>11</sub>H<sub>13</sub> NO<sub>2</sub>+H 192.1027, Found 192.1025

---

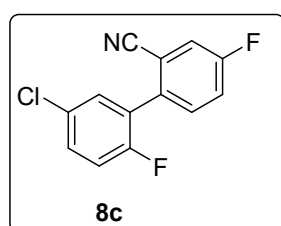

**5'-chloro-2',4-difluoro-[1,1'-biphenyl]-2-carbonitrile**

**<sup>1</sup>H and <sup>13</sup>C NMR were in agreement with the literature<sup>30</sup>**

**C<sub>13</sub>H<sub>6</sub>ClF<sub>2</sub>N** **Melting Point :**117.8 °C -118.9 °C

**MW:** 249.64 g·mol<sup>-1</sup> **Yellow Solid**

---

**Isolated amounts:** 199.71 mg      **Yield:** 80%

**<sup>1</sup>H NMR (400 MHz, CDCl<sub>3</sub>, δ ppm):** 7.48(t, *J*=9.2 Hz, 2H), 7.39 (q, *J*=9.6 Hz, 3H), 7.17 (t, *J*=9 Hz, 1H)

**<sup>13</sup>C NMR (100 MHz, CDCl<sub>3</sub>, δ ppm):** 161.08 (d, *J* =387Hz), 158.59 (d, *J* =384 Hz), 134.40 (d, *J* =4 Hz), 132.79 (dd, *J* =9, 1 Hz), 130.90, 130.85, 130.82, 129.54 (d, *J* =3 Hz), 126.28 (d, *J*=16 Hz), 120.28 (dd, *J* =3, 1 Hz), 117.58(d *J*= 24 Hz), 116.41(d, *J*=3 Hz), 114.28(d, *J* =9 Hz)

**<sup>19</sup>F NMR (376 MHz, CDCl<sub>3</sub>, δ ppm):** δ-110.55, δ-117.54

---

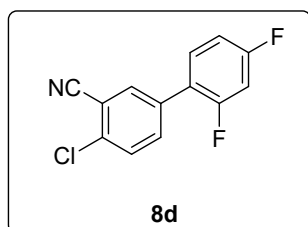

**4-chloro-2',4'-difluoro-[1,1'-biphenyl]-3-carbonitrile**

**C<sub>13</sub>H<sub>6</sub>ClF<sub>2</sub>N**

**MW:** 249.64 g·mol<sup>-1</sup>

**Colorless Oil**

**Isolated amounts:** 217.18 mg

**Yield:** 87%

**<sup>1</sup>H NMR (400 MHz, CDCl<sub>3</sub>, δ ppm):** 7.80 (s, 1H) 7.68(d, *J*=8.4 Hz, 1H), 7.59, (d, *J*=8.4 Hz, 1H), 7.39(q, *J*=8.0 Hz, 1H), 7.03-6.93 (m, 2H)

**<sup>13</sup>C NMR (100 MHz, CDCl<sub>3</sub>, δ ppm):** 162.54 (dd, *J*=332, 12Hz), 160.04 (dd, *J*=332, 12Hz), 136.07, 134.36, 134.05 (dd, *J* =13, 3Hz), 131.03 (dd, *J* =9, 4Hz), 130.18, 121.95 (dd, *J* =13, 4Hz), 115.68, 113.66, 112.22(dd, *J* =21, 4Hz), 104.81(t, *J* = 26 Hz)

**<sup>19</sup>F NMR (376 MHz, CDCl<sub>3</sub>, δ ppm):** δ-108.41, δ-113.19

**HRMS (ESI)** Calcd for C<sub>13</sub>H<sub>6</sub>ClF<sub>2</sub>N +H 250.0238, Found 250.0235

---

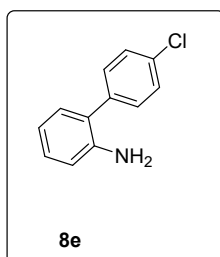

**4'-chloro-[1,1'-biphenyl]-2-amine**

**<sup>1</sup>H and <sup>13</sup>C NMR were in agreement with the literature<sup>31</sup>**

**C<sub>12</sub>H<sub>10</sub>ClN**

**MW:** 230.67 g·mol<sup>-1</sup>

**Yellow Oil**

**Isolated amounts:** 186.84 mg

**Yield:** 81%

**<sup>1</sup>H NMR (400 MHz, CDCl<sub>3</sub>, δ ppm):** 7.40-7.36 (m, 4H) ,7.14(t, *J*=7.6 Hz, 1H), 7.07, (d, *J*=7.2 Hz, 1H), 6.81 (t, *J*=7.6 Hz, 1H), 6.73 (d, *J*=8.0 Hz, 1H), 3.66(s, 2H).



---

**<sup>13</sup>C NMR (100 MHz, CDCl<sub>3</sub>, δ ppm):**143.25, 137.73, 132.82, 130.26, 130.15, 128.78, 128.65, 126.01, 118.55, 115.55.

---

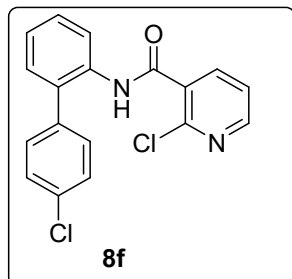

**2-chloro-N-(4'-chloro-[1,1'-biphenyl]-2-yl)nicotinamide**

**<sup>1</sup>H and <sup>13</sup>C NMR were in agreement with the literature<sup>32</sup>**

**C<sub>18</sub>H<sub>12</sub>Cl<sub>2</sub>N<sub>2</sub>O**

**Melting Point :140.4 °C -141.6 °C**

**MW: 343.21 g·mol<sup>-1</sup>**

**White Solid**

**Isolated amounts: 302.02 mg**

**Yield: 88%**

**<sup>1</sup>H NMR (400 MHz, CDCl<sub>3</sub>, δ ppm):** 8.35-8.29 (m, 2H), 8.04(s, 1H), 8.03, (d, *J*=7.6 Hz, 1H), 7.38-7.34 (m, 3H), 7.25 (d, *J*=7.2 Hz, 3H), 7.19-7.18 (m, 2H).

**<sup>13</sup>C NMR (100 MHz, CDCl<sub>3</sub>, δ ppm):**162.50, 151.17, 146.58, 139.96, 136.19, 134.30, 134.17, 132.29, 131.03, 130.71, 130.17, 129.19, 128.79, 125.33, 122.82, 122.18.

---

## 8. Optimization of the Reaction Conditions.

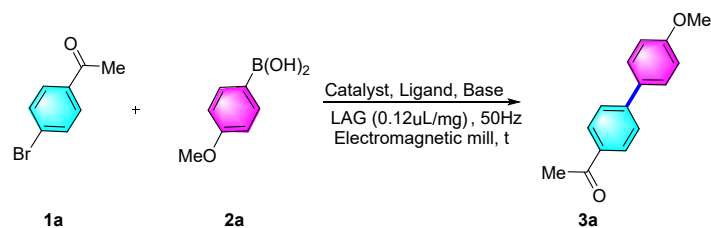

| Entry     | Catalyst                                          | Ligand                                  | Base                            | LAG         | time/h   | Yield/% <sup>b</sup> |
|-----------|---------------------------------------------------|-----------------------------------------|---------------------------------|-------------|----------|----------------------|
| 1         | Pd(OAc) <sub>2</sub> (3 mol%)                     | DavePhos                                | CsF                             | -           | 3        | 82                   |
| 2         | Pd(OAc) <sub>2</sub> (0.5 mol%)                   | DavePhos                                | CsF                             | -           | 3        | 93                   |
| 3         | Pd(OAc) <sub>2</sub> (0.1 mol%)                   | DavePhos                                | CsF                             | -           | 3        | 95                   |
| 4         | Pd(OAc) <sub>2</sub> (0.05 mol%)                  | DavePhos                                | CsF                             | -           | 3        | 95                   |
| 5         | Pd(OAc) <sub>2</sub> (0.02 mol%)                  | DavePhos                                | CsF                             | -           | 3        | 56                   |
| 6         | Pd(OAc) <sub>2</sub> (0.01 mol%)                  | DavePhos                                | CsF                             | -           | 3        | 32                   |
| 7         | -                                                 | DavePhos                                | CsF                             | -           | 3        | -                    |
| 8         | Pd(OAc) <sub>2</sub> (0.05 mol%)                  | DavePhos                                | K <sub>2</sub> CO <sub>3</sub>  | -           | 3        | 76                   |
| 9         | Pd(OAc) <sub>2</sub> (0.05 mol%)                  | DavePhos                                | KOAc                            | -           | 3        | 73                   |
| 10        | Pd(OAc) <sub>2</sub> (0.05 mol%)                  | DavePhos                                | Cs <sub>2</sub> CO <sub>3</sub> | -           | 3        | 50                   |
| 11        | Pd(OAc) <sub>2</sub> (0.05 mol%)                  | DavePhos                                | KF                              | -           | 3        | 97                   |
| 12        | Pd(OAc) <sub>2</sub> (0.05 mol%)                  | dppf                                    | KF                              | -           | 3        | 86                   |
| 13        | Pd(OAc) <sub>2</sub> (0.05 mol%)                  | xphos                                   | KF                              | -           | 4        | 84                   |
| 14        | Pd(OAc) <sub>2</sub> (0.05 mol%)                  | PCy <sub>3</sub>                        | KF                              | -           | 5        | 73                   |
| 15        | Pd(OAc) <sub>2</sub> (0.05 mol%)                  | PPh <sub>3</sub>                        | KF                              | -           | 5        | 88                   |
| 16        | Pd(OAc) <sub>2</sub> (0.05 mol%)                  | PhDavePhos                              | KF                              | -           | 3        | 81                   |
| 17        | Pd(OAc) <sub>2</sub> (0.05 mol%)                  | Ruphos                                  | KF                              | -           | 3        | 82                   |
| 18        | Pd(OAc) <sub>2</sub> (0.05 mol%)                  | 1,1'-Bis(diisopropylphosphino)ferrocene | KF                              | -           | 3        | 79                   |
| 19        | PdCl <sub>2</sub> (0.05 mol%)                     | DavePhos                                | KF                              | -           | 1        | 79                   |
| <b>20</b> | <b>Pd(dppf)Cl<sub>2</sub> (0.05 mol%)</b>         | <b>DavePhos</b>                         | <b>KF</b>                       | <b>-</b>    | <b>1</b> | <b>99</b>            |
| 21        | Pd <sub>2</sub> (dba) <sub>3</sub> (0.05 mol%)    | DavePhos                                | KF                              | -           | 3        | 79                   |
| 22        | Pd(dba) <sub>2</sub> (0.05 mol%)                  | DavePhos                                | KF                              | -           | 3        | 56                   |
| 23        | PdCl <sub>2</sub> (MeCN) <sub>2</sub> (0.05 mol%) | DavePhos                                | KF                              | -           | 1        | 90                   |
| 24        | Pd(dppf)Cl <sub>2</sub> (0.05 mol%)               | -                                       | KF                              | -           | 1        | 85                   |
| 25        | Pd(dppf)Cl <sub>2</sub> (0.05 mol%)               | DavePhos                                | KF                              | 1,5-cod     | 1        | 25                   |
| 26        | Pd(dppf)Cl <sub>2</sub> (0.05 mol%)               | DavePhos                                | KF                              | MeCN        | 1        | 92                   |
| 27        | Pd(dppf)Cl <sub>2</sub> (0.05 mol%)               | DavePhos                                | KF                              | toluene     | 1        | 93                   |
| 28        | Pd(dppf)Cl <sub>2</sub> (0.05 mol%)               | DavePhos                                | KF                              | DMSO        | 1        | 85                   |
| 29        | Pd(dppf)Cl <sub>2</sub> (0.05 mol%)               | DavePhos                                | KF                              | THF         | 1        | 98                   |
| 30        | Pd(dppf)Cl <sub>2</sub> (0.05 mol%)               | DavePhos                                | KF                              | DME         | 1        | 99                   |
| 31        | Pd(dppf)Cl <sub>2</sub> (0.05 mol%)               | DavePhos                                | KF                              | Cyclohexene | 1        | 77                   |

---

## 9. References

- [1] Seo, T.; Toyoshima, N.; Kubota, K., Ito, H. Tackling Solubility Issues in Organic Synthesis: Solid-State Cross-Coupling of Insoluble Aryl Halides. *J. Am. Chem. Soc.* **2021**, *143*, 6165-6175.
- [2] Planellas, M.; Pleixats, R.; Shafir, A. *Adv. Synth. Catal.* **2012**, *354*, 651.
- [3] Billingsley K L, Barder T E, Buchwald S L. Palladium - catalyzed borylation of aryl chlorides: Scope, applications, and computational studies. *Angewandte Chemie International Edition*, **2007**, *46*, 5359-5363.
- [4] Kylmäälä, Tuula, et al. "Synthesis of Chlorinated Biphenyls by Suzuki Cross - Coupling Using Diamine or Diimine - Palladium Complexes." (2008): 4019-4024.
- [5] Ke H, Chen X, Zou G. N-Heterocyclic Carbene-Assisted, Bis (phosphine) nickel-Catalyzed Cross-Couplings of Diarylborinic Acids with Aryl Chlorides, Tosylates, and Sulfamates. *The Journal of organic chemistry*, **2014**, *79*, 7132-7140.
- [6] Shih W C, Chiang Y T, Wang Q, et al. Invisible Chelating Effect Exhibited between Carbodicarbene and Phosphine through  $\pi$ - $\pi$  Interaction and Implication in the Cross-Coupling Reaction. *Organometallics*, **2017**, *36*, 4287-4297.
- [7] Qian H, Yu S, Song L, et al. ONO pincer palladium (II) complexes featuring fuoylhydrazone ligands: Synthesis, characterization and catalytic activity towards Suzuki-Miyaura coupling reaction. *Applied Organometallic Chemistry*, **2019**, *33*, 5116.
- [8] Sh Solodenko W, Mennecke K, Vogt C, et al. Polyvinylpyridine, a versatile solid phase for coordinative immobilisation of palladium precatalysts-Applications in Suzuki-Miyaura reactions. *Synthesis*, 2006, *2006*, 1873-1881.
- [9] Peng H, Chen Y Q, Mao S L, et al. A general catalyst for Suzuki-Miyaura and Sonogashira reactions of aryl and heteroaryl chlorides in water. *Organic & biomolecular chemistry*, **2014**, *12*, 6944-6952.
- [10] Liu Y, Gu N, Liu P, et al. Water-soluble salen-Pd complex as an efficient catalyst for Suzuki-Miyaura reaction of sterically hindered substrates in pure water[J]. *Tetrahedron*, **2015**, *71*, 7985-7989.
- [11] Zhou Z, Qiu J, Xie L, et al. Synthesis of chiral imidazolium salts from a carbohydrate and their application in Pd-catalyzed Suzuki-Miyaura reaction[J]. *Catalysis letters*, **2014**, *144*, 1911-1918.
- [12] Fortun S, Beauclair P, Schmitzer A R. Metformin as a versatile ligand for recyclable palladium-catalyzed cross-coupling reactions in neat water. *RSC advances*, **2017**, *7*, 21036-21044.
- [13] Qing Huang • Jiabin Qiu • Limei Li • Guohai Xu • Zhonggao Zhou Efficient PdCl<sub>2</sub>-catalyzed Suzuki reactions using simple dicationic imidazolium salts as ligands in aqueous DMF. *Transition Met Chem.* **2014**, *39*,661-665
- [14] Stibingerova I, Voltrova S, Kocova S, et al. Modular approach to heterogenous catalysis. Manipulation of cross-coupling catalyst activity. *Organic letters*, **2016**,

- 
- 18, 312-315.
- [15] Sun P, Yang J, Chen C, et al. Synthesis of a Cellulosic Pd (salen)-Type Catalytic Complex as a Green and Recyclable Catalyst for Cross-Coupling Reactions[J]. *Catalysis Letters*, **2020**, *150*, 2900-2910.
- [16] Yoshida H, Seki M, Kamio S, et al. Direct Suzuki–Miyaura Coupling with Naphthalene-1, 8-diaminato (dan)-Substituted Organoborons. *ACS Catalysis*, **2019**, *10*, 346-351.
- [17] Enokido, T.; Fugami, K.; Endo, M.; Kameyama, M.; Kosugi, M. *Adv. Synth. Catal.* **2004**, *346*, 1685-1688.
- [18] Li X, Zhang T, Hu R, et al. A one-pot protocol for the fluorosulfonation and Suzuki coupling of phenols and bromophenols, streamlined access to biaryls and terphenyls. *Organic & biomolecular chemistry*, **2020**, *18*, 4748-4753.
- [19] Tobisu M, Shimasaki T, Chatani N. Nickel - catalyzed cross - coupling of aryl methyl ethers with aryl boronic esters. *Angewandte Chemie*, **2008**, *120*, 4944-4947.
- [20] Korn T J, Knochel P. Cobalt (II)–Catalyzed Cross - Coupling of Polyfunctional Aryl Copper Reagents with Aryl Bromides and Chlorides. *Angewandte Chemie International Edition*, **2005**, *44*, 2947-2951.
- [21] Pinto-Bazurco Mendieta M A E, Negri M, Jagusch C, et al. Synthesis, biological evaluation, and molecular modeling of abiraterone analogues: novel CYP17 inhibitors for the treatment of prostate cancer. *Journal of medicinal chemistry*, **2008**, *51*, 5009-5018.
- [22] Tamba S, Okubo Y, Tanaka S, et al. Palladium-Catalyzed C–H Functionalization of Heteroarenes with Aryl Bromides and Chlorides. *The Journal of organic chemistry*, **2010**, *75*, 6998-7001.
- [23] Zhang C L, Ye S. N-heterocyclic carbene-catalyzed construction of 1, 3, 5-trisubstituted benzenes from bromoenals and  $\alpha$ -cyano- $\beta$ -methyleneones. *Organic letters*, **2016**, *18*, 6408-6411.
- [24] Wang J, Li T, Zhao Z, et al. Pd Nanoparticles Embedded Into MOF-808: Synthesis, Structural Characteristics, and Catalyst Properties for the Suzuki–Miyaura Coupling Reaction. *Catalysis Letters*, **2021**:1-10.
- [25] Inamoto K, Kadokawa J, Kondo Y. Ruthenium-Catalyzed Carbonylative C–H Cyclization of 2-Arylphenols: A Novel Synthetic Route to 6 H-Dibenzo [b, d] pyran-6-ones. *Organic letters*, **2013**, *15*, 3962-3965.
- [26] Esguerra K V N, Fall Y, Lumb J P. A biomimetic catalytic aerobic functionalization of phenols. *Angewandte Chemie*, **2014**, *126*, 5987-5991.
- [27] Miguel - Ávila J, Tomás - Gamasa M, Mascareñas J L. Intracellular Ruthenium - Promoted (2+ 2+ 2) Cycloadditions. *Angewandte Chemie International Edition*, **2020**, *59*, 17628-17633.
- [28] Seo T, Ishiyama T, Kubota K, et al. Solid-state Suzuki–Miyaura cross-coupling

- 
- reactions: olefin-accelerated C–C coupling using mechanochemistry. *Chemical science*, **2019**, *10*, 8202-8210.
- [29] Ahmed J, Chakraborty S, Jose A, et al. Integrating Organic Lewis Acid and Redox Catalysis: The Phenalenyl Cation in Dual Role. *Journal of the American Chemical Society*, **2018**, *140*, 8330-8339.
- [30] Cameron M, Foster B S, Lynch J E, et al. The Expedient Synthesis of 4, 2 ‘- Difluoro-5 ‘-(7-trifluoromethyl-imidazo [1, 2-a] pyrimidin-3-yl) biphenyl-2-carbonitrile, a GABA  $\alpha$ 2/3 Agonist. *Organic process research & development*, **2006**, *10*, 398-402.
- [31] Felpin F X, Fouquet E, Zakri C. Improved Suzuki–Miyaura reactions of aryldiazonium salts with boronic acids by tuning palladium on charcoal catalyst properties. *Advanced Synthesis Catalysis*, **2009**, *351*, 649-655.
- [32] Takale B S, Thakore R R, Mallarapu R, et al. A Sustainable 1-Pot, 3-Step Synthesis of boscalid using part per million level Pd catalysis in water. *Organic process research development*, **2019**, *24*, 101-105.

## 10. Copies of the $^1\text{H}$ NMR, $^{13}\text{C}$ NMR

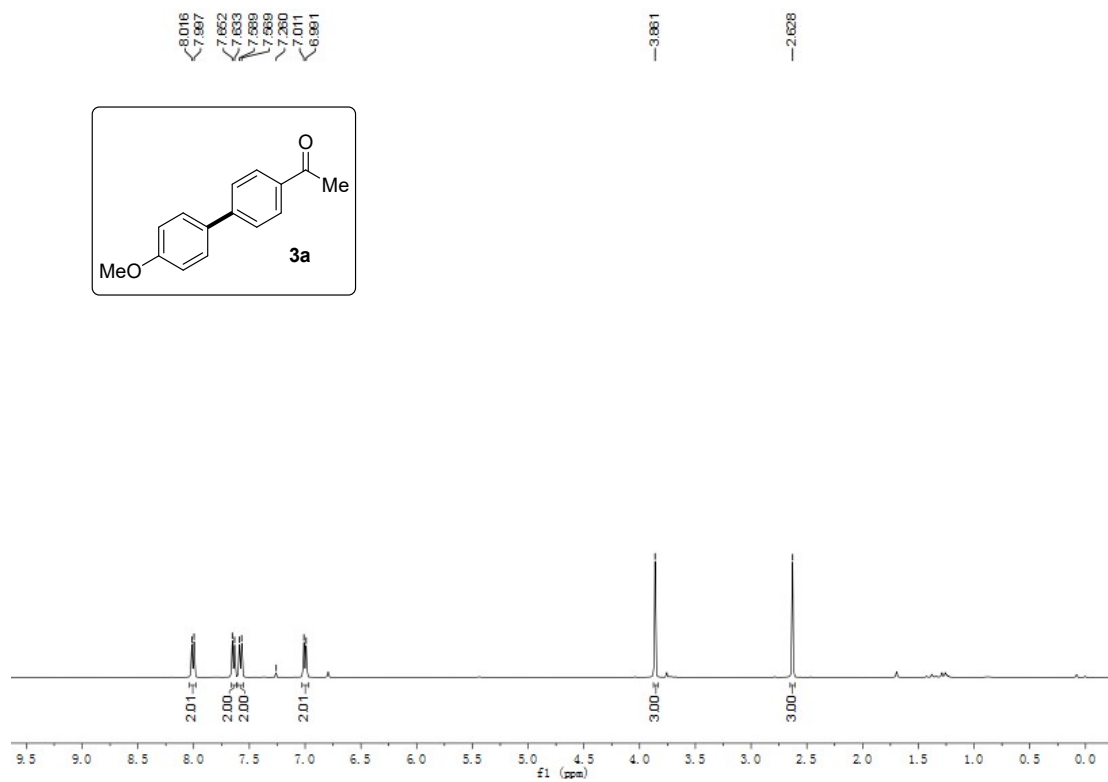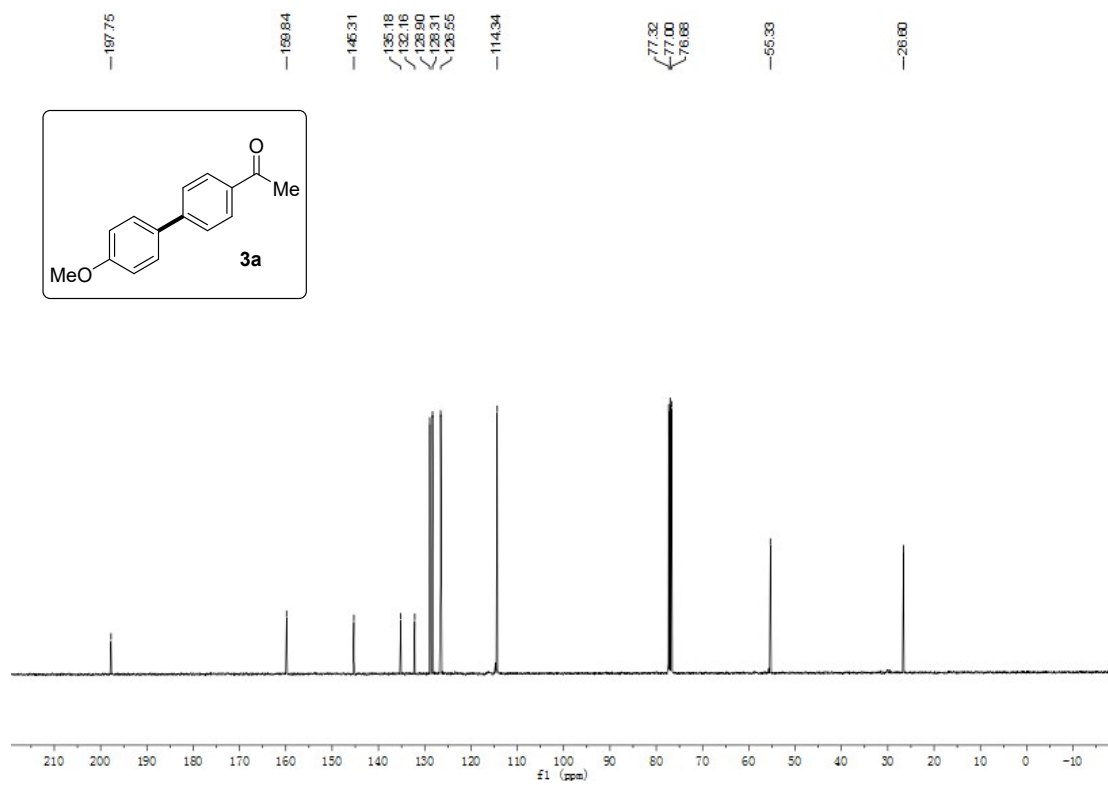

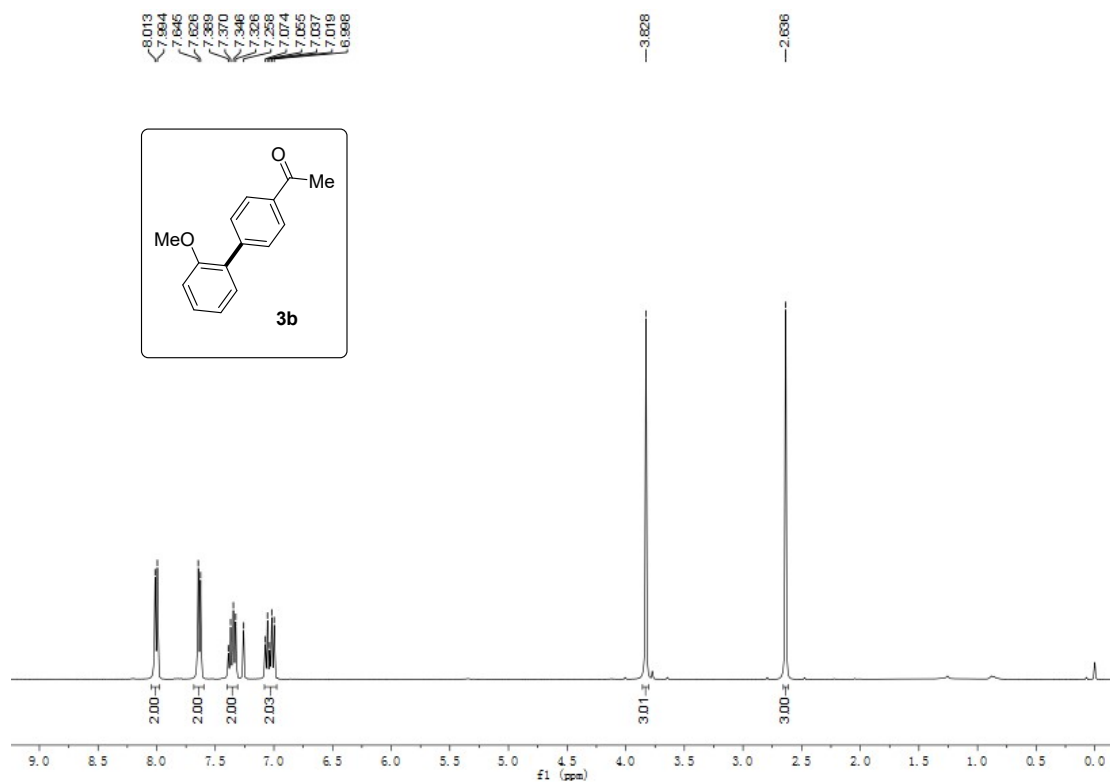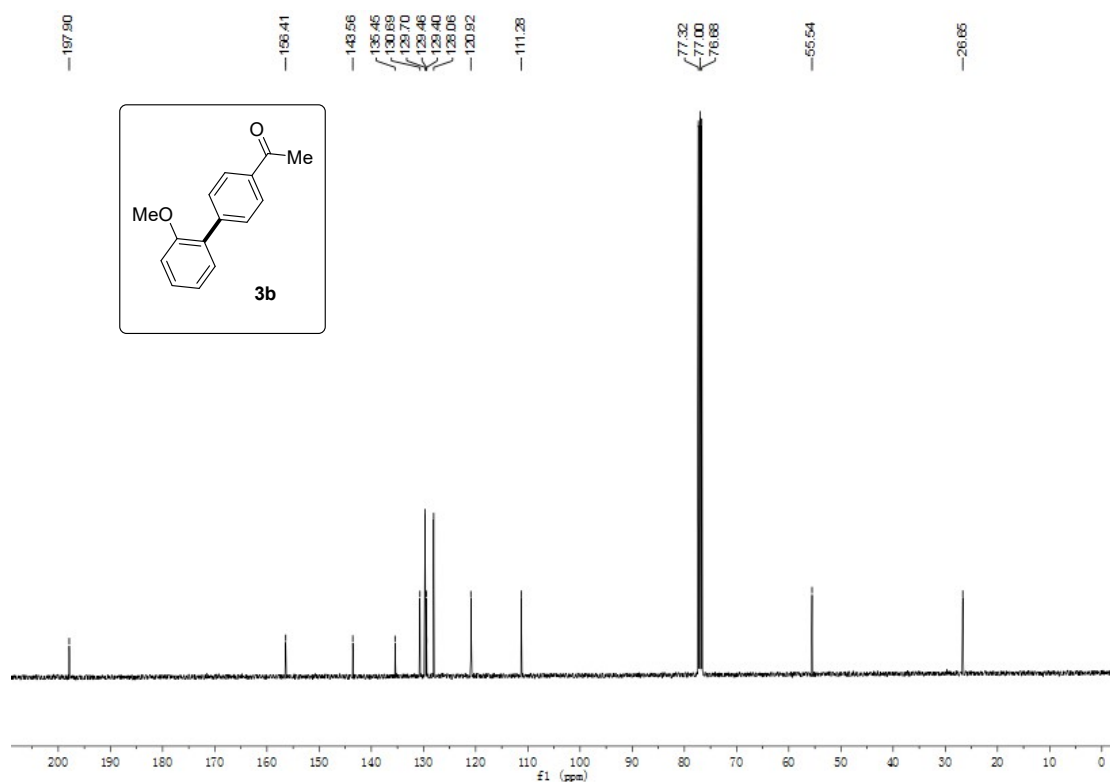

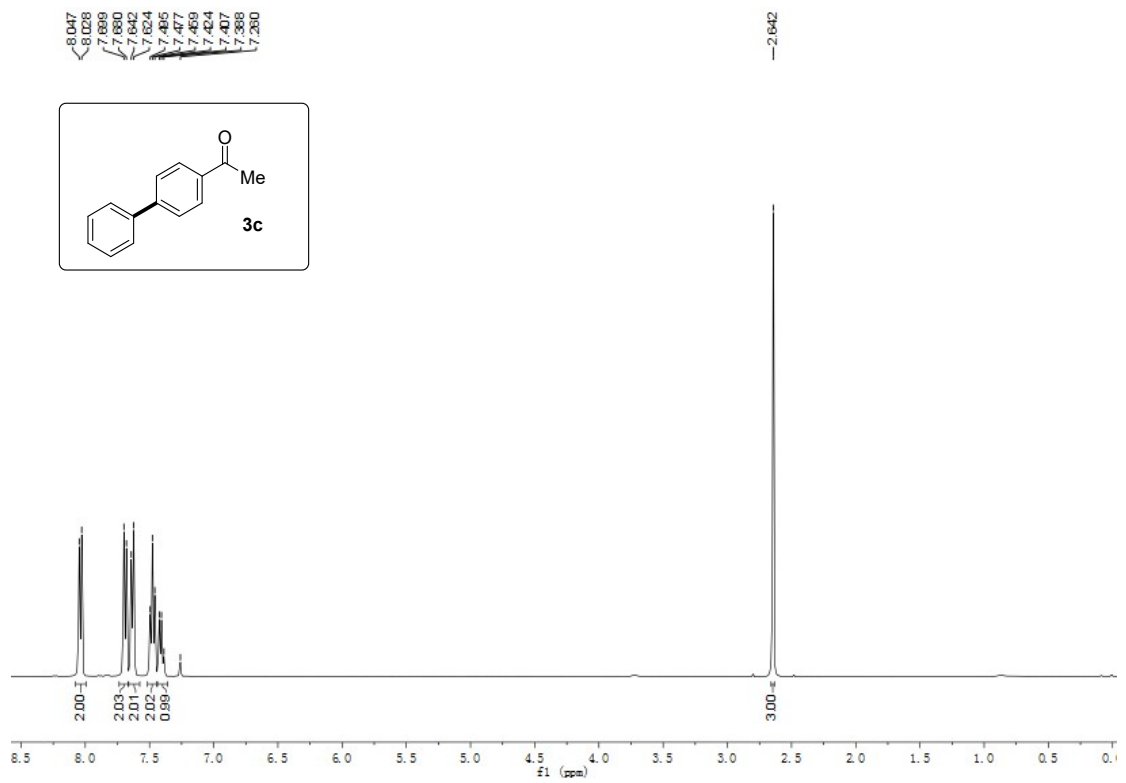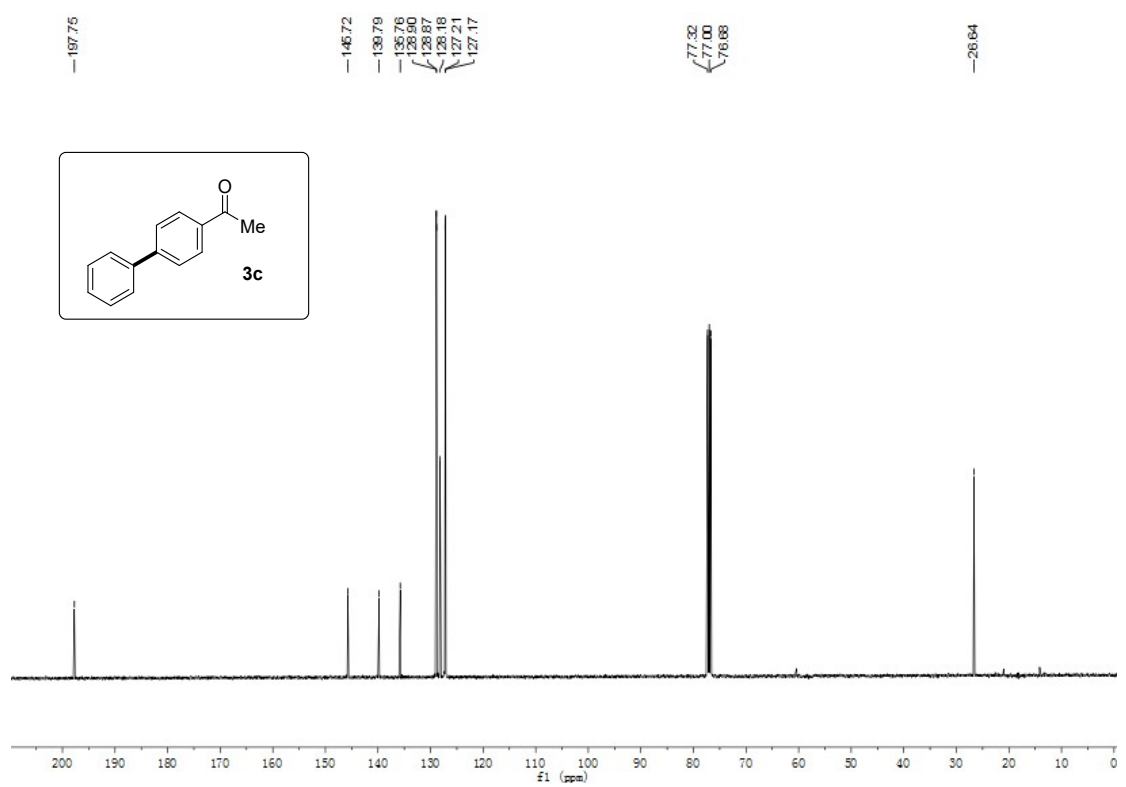



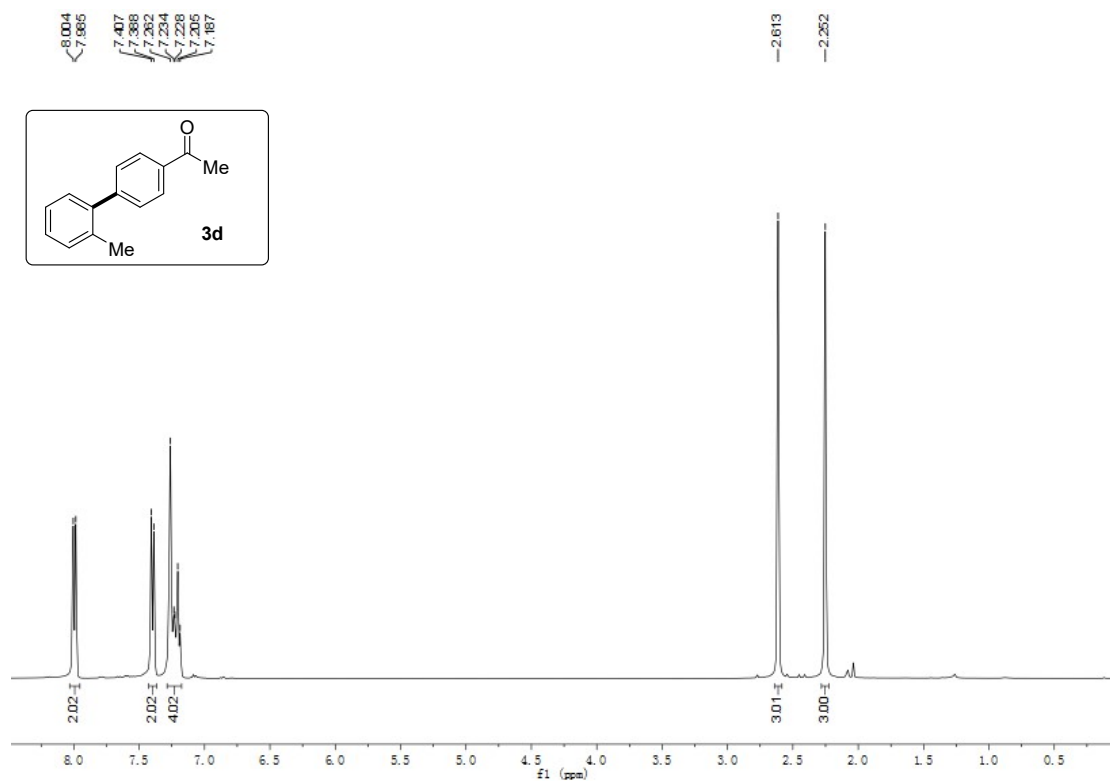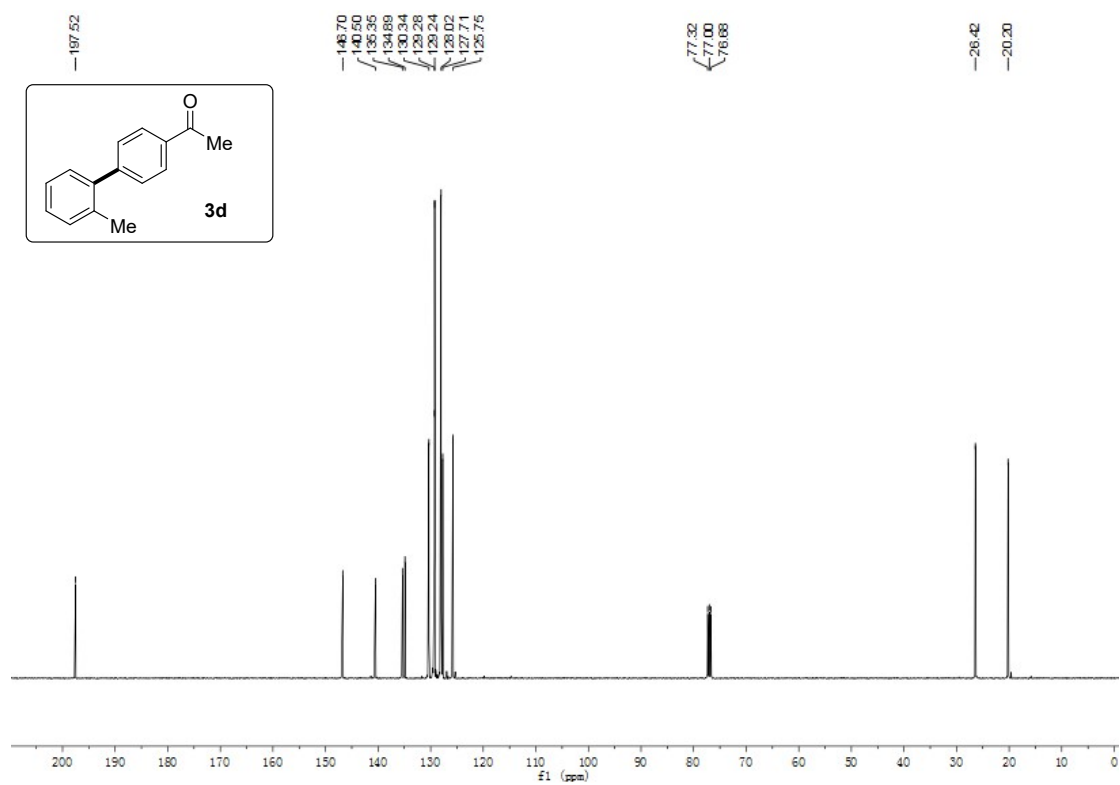

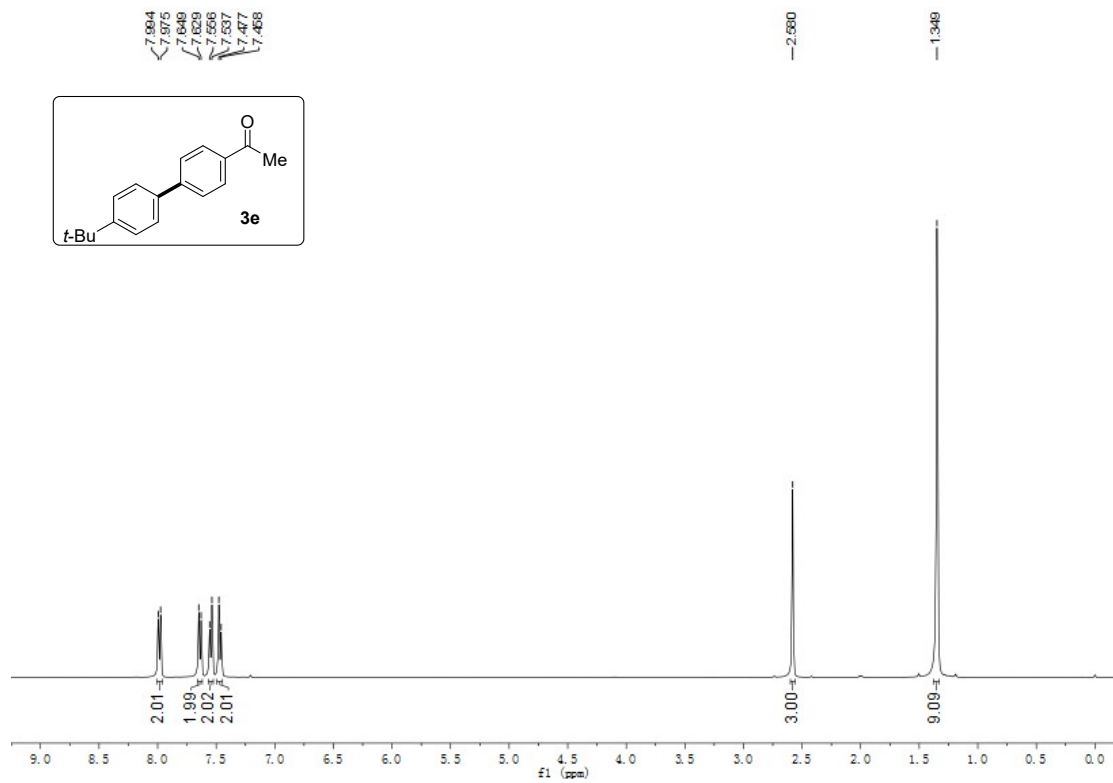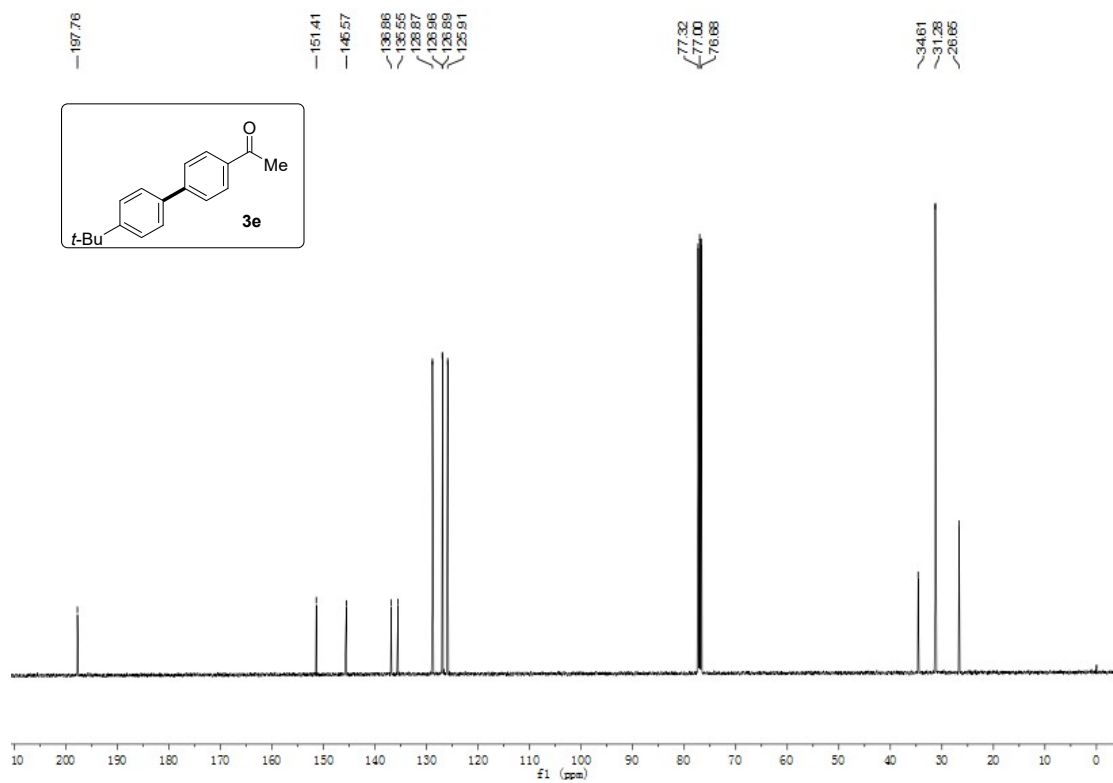

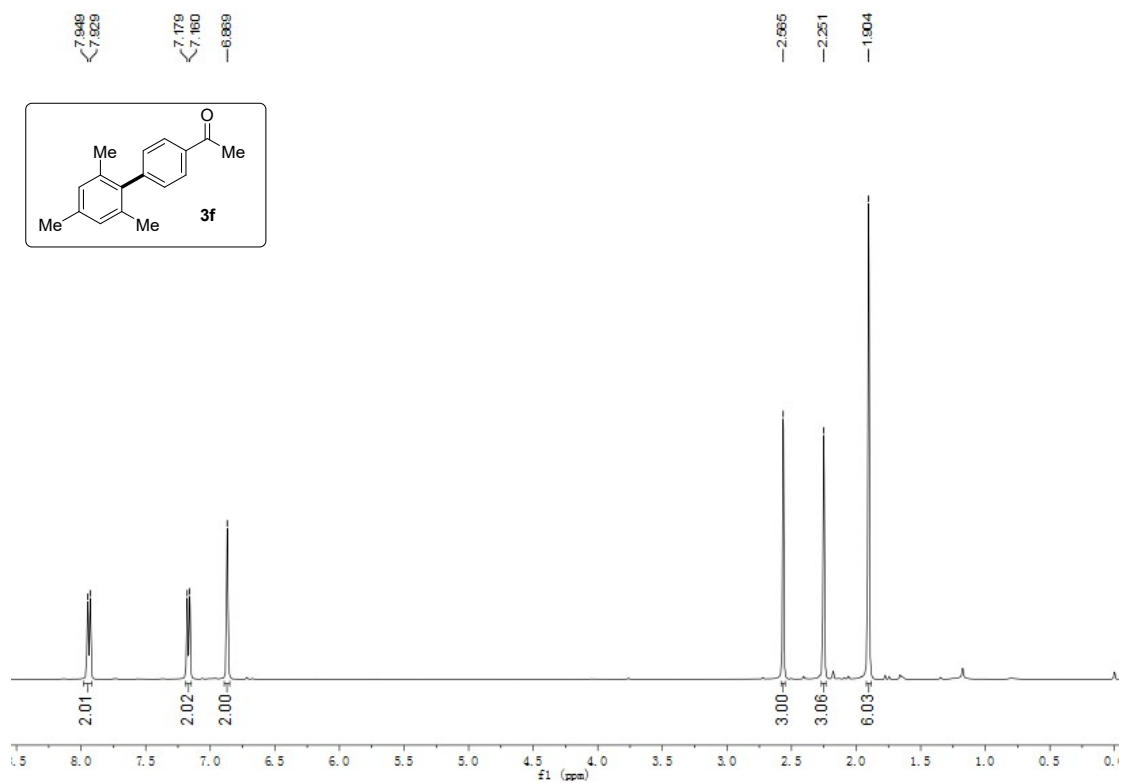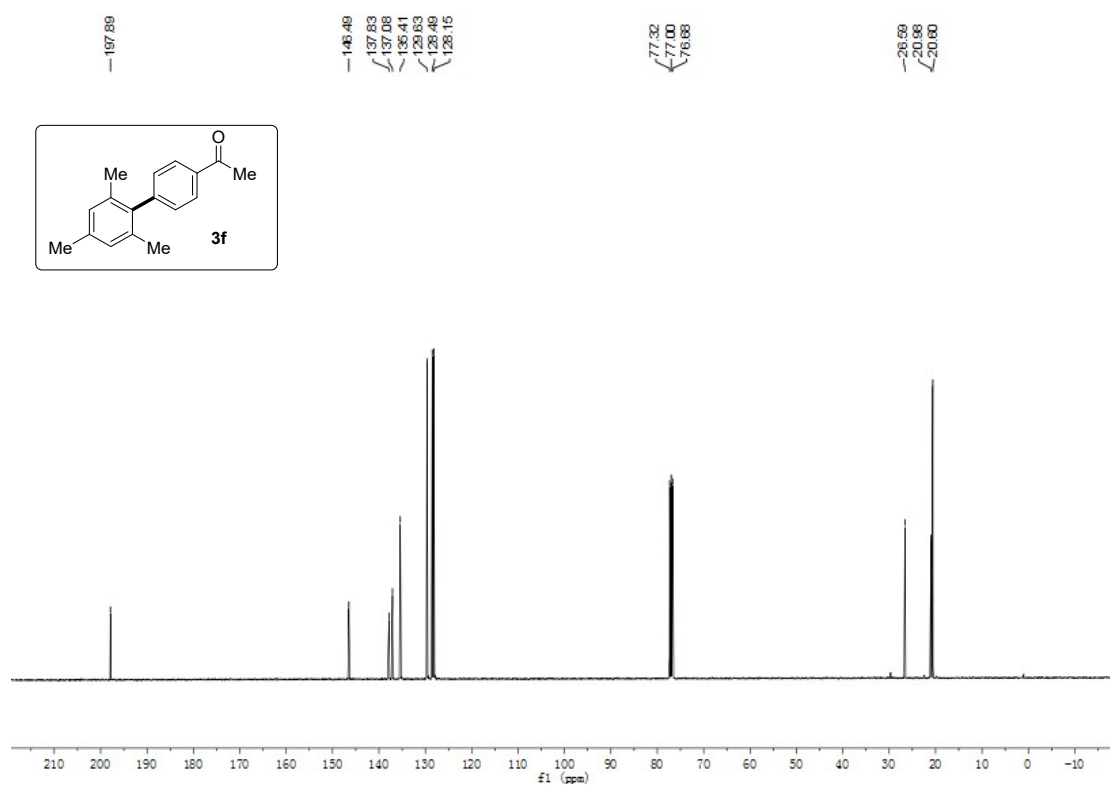

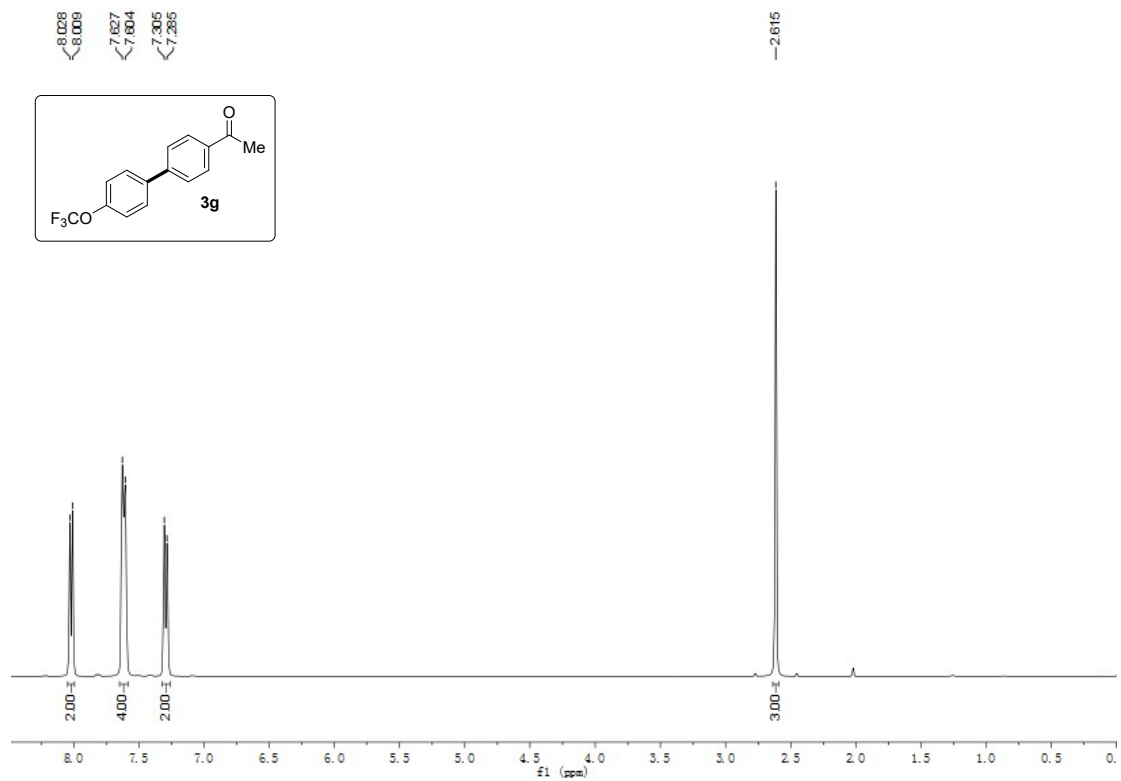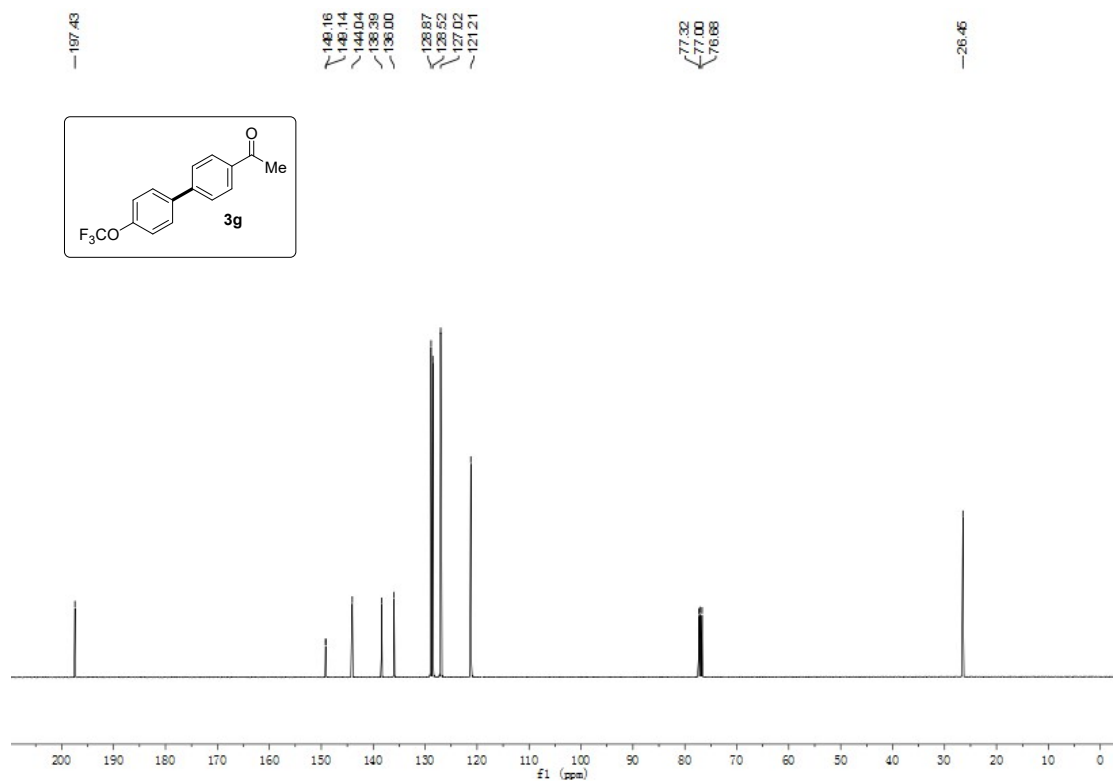

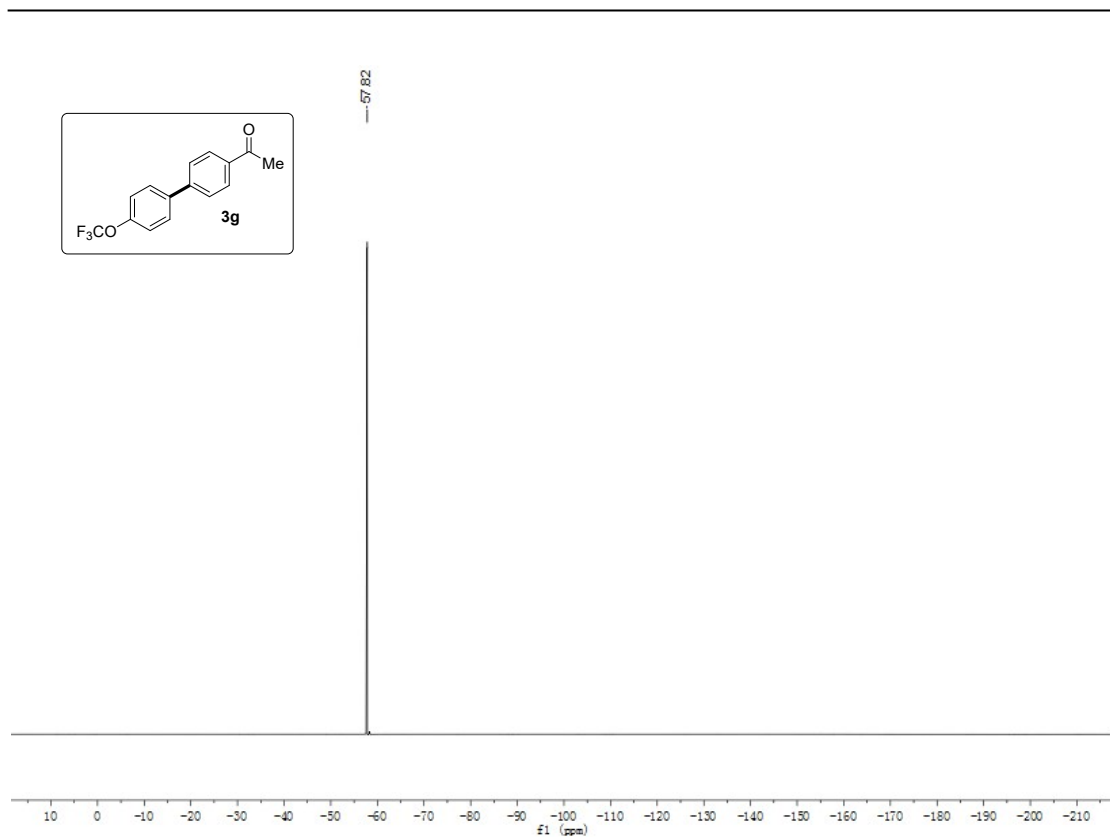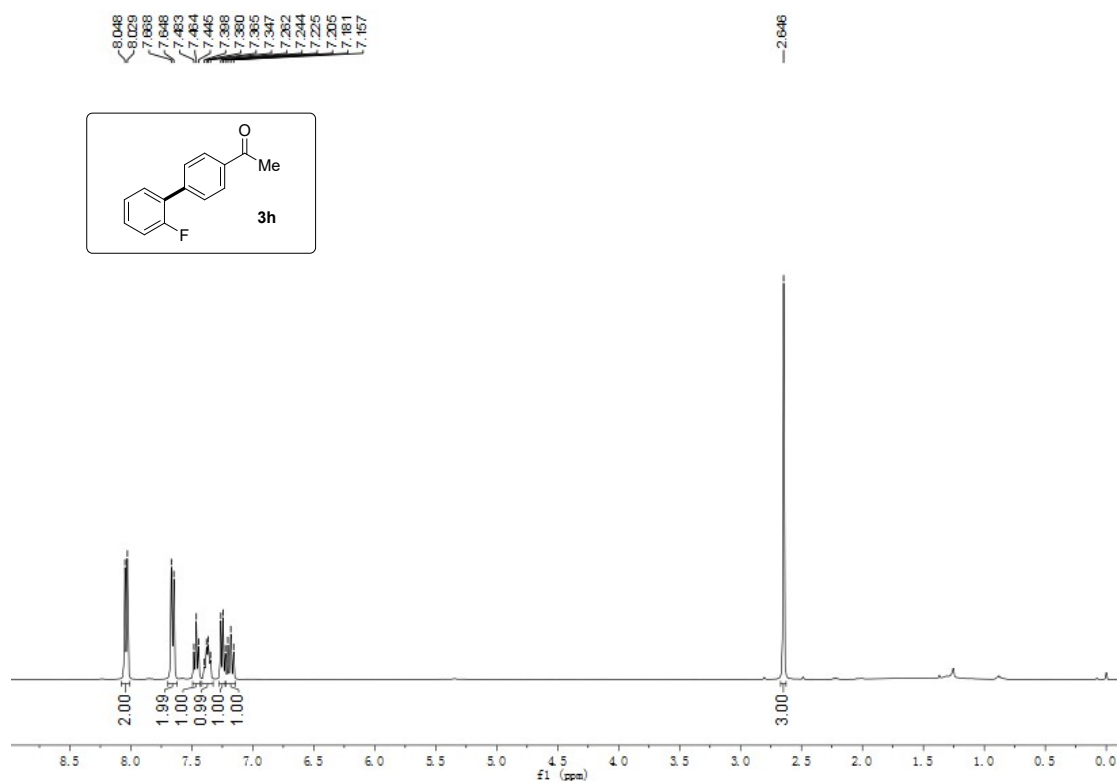

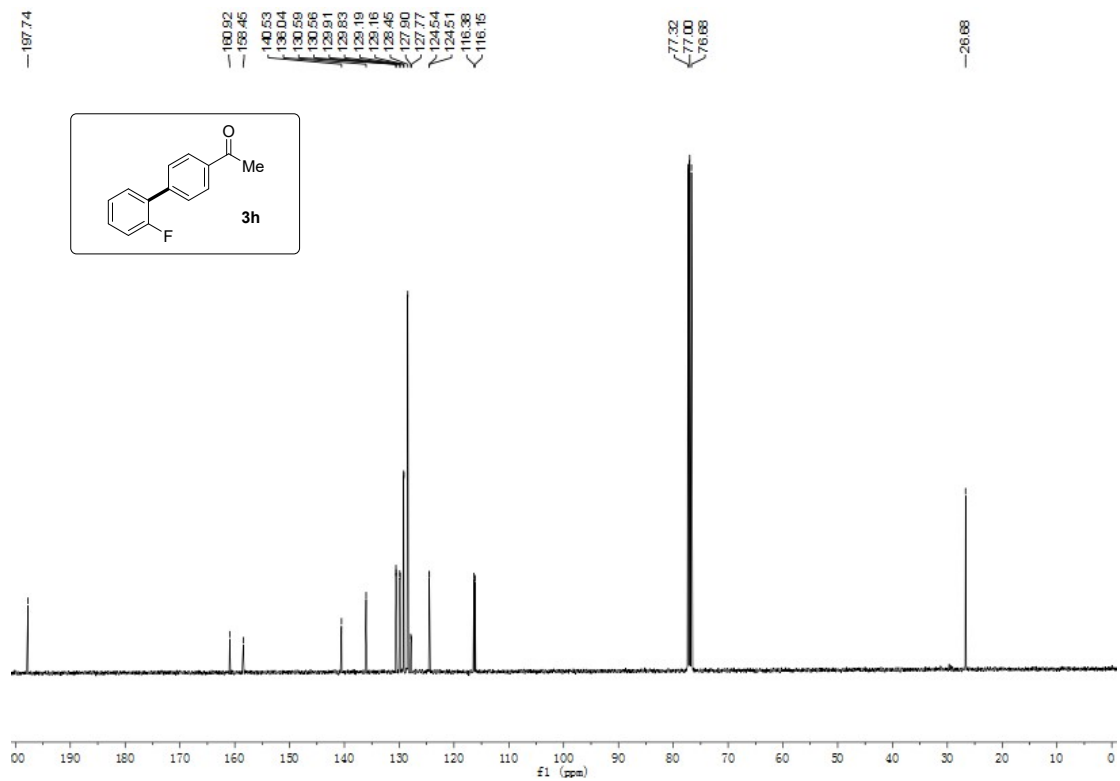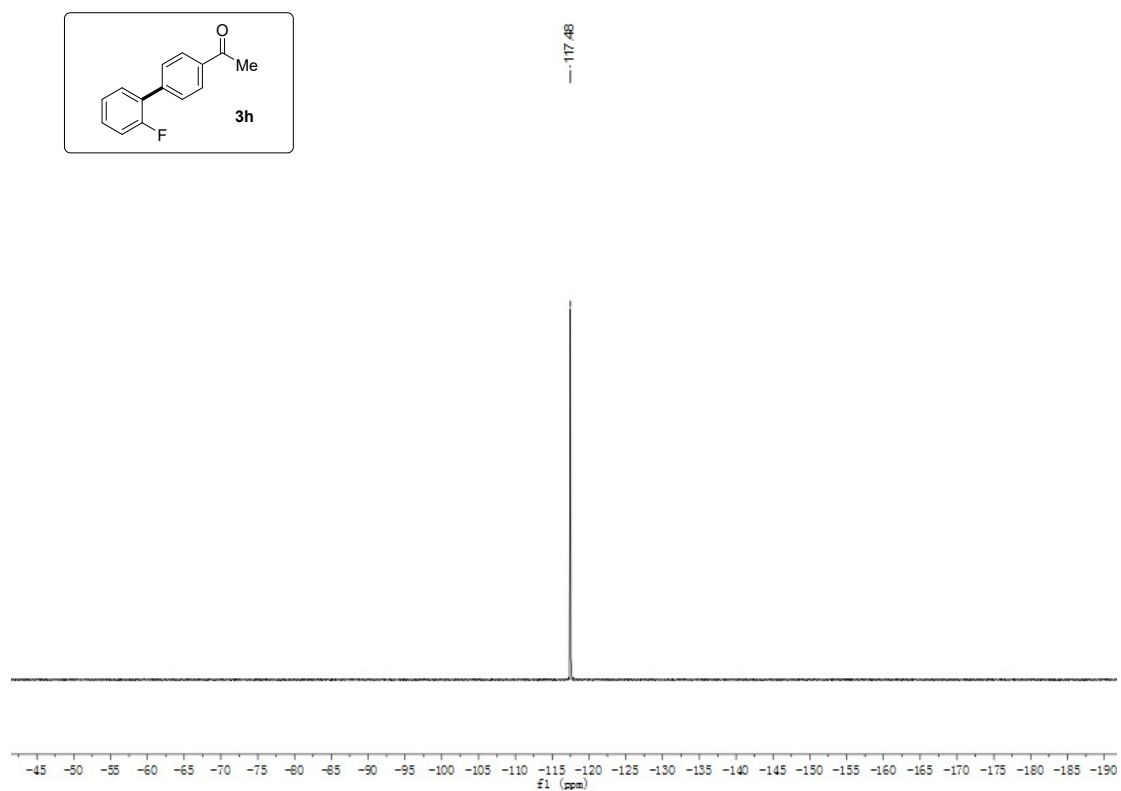

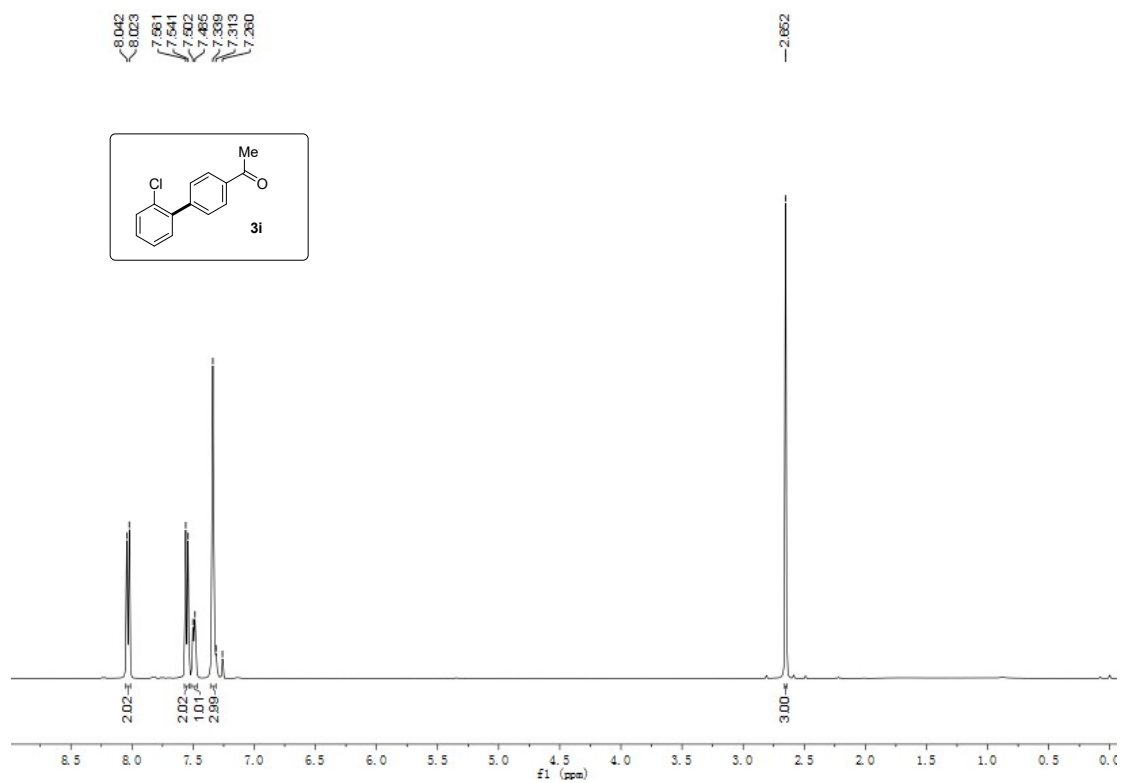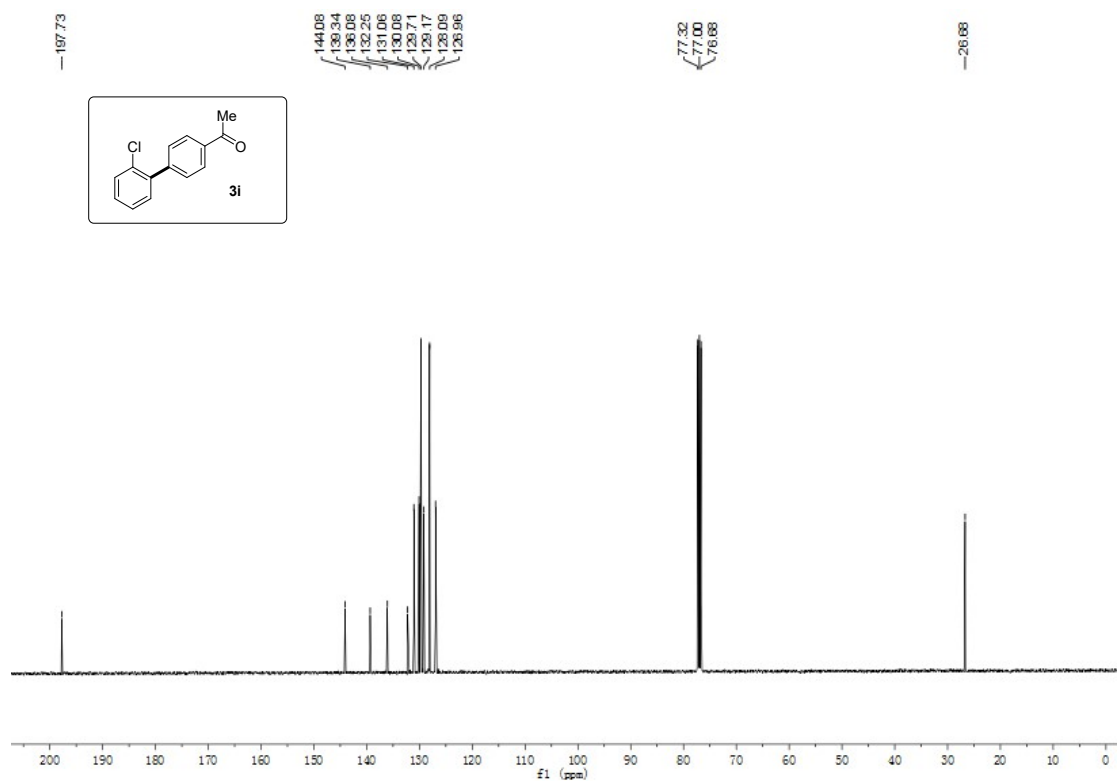

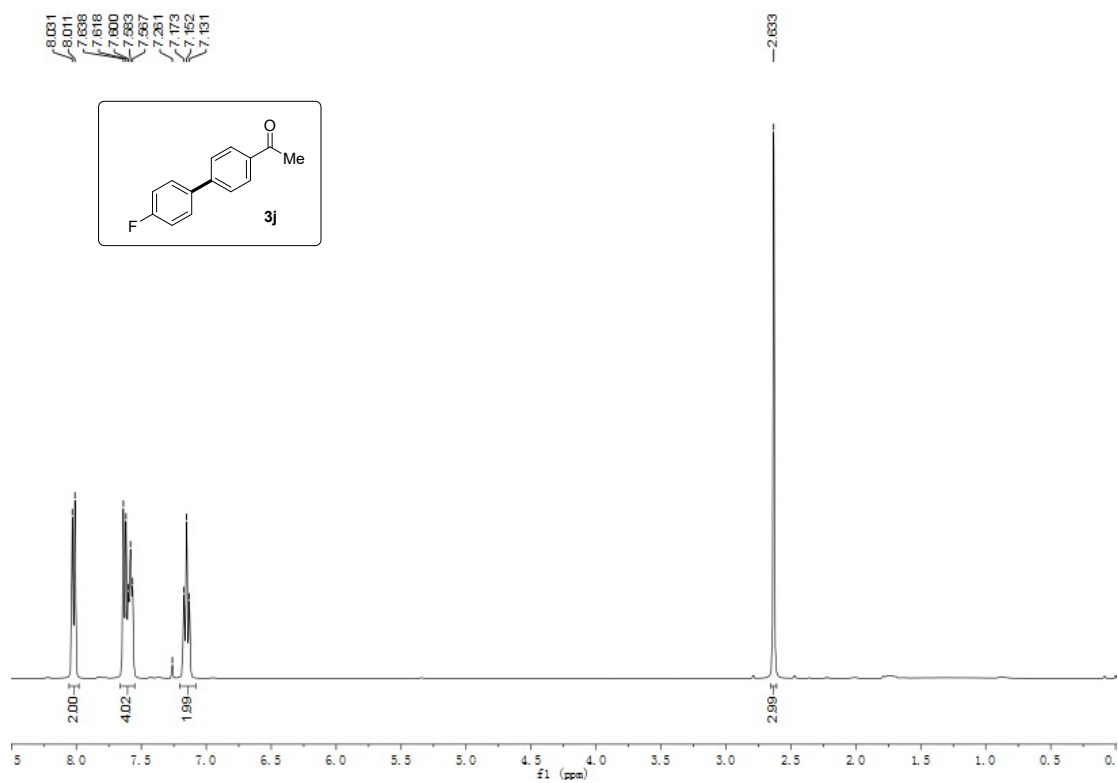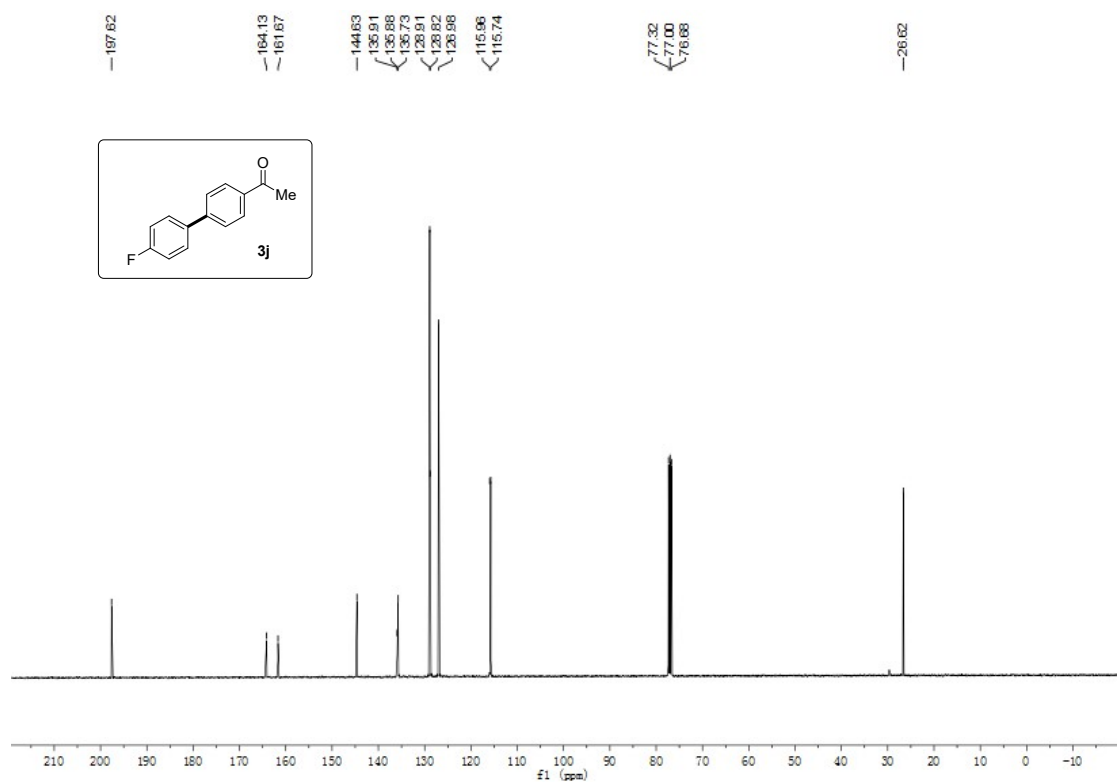



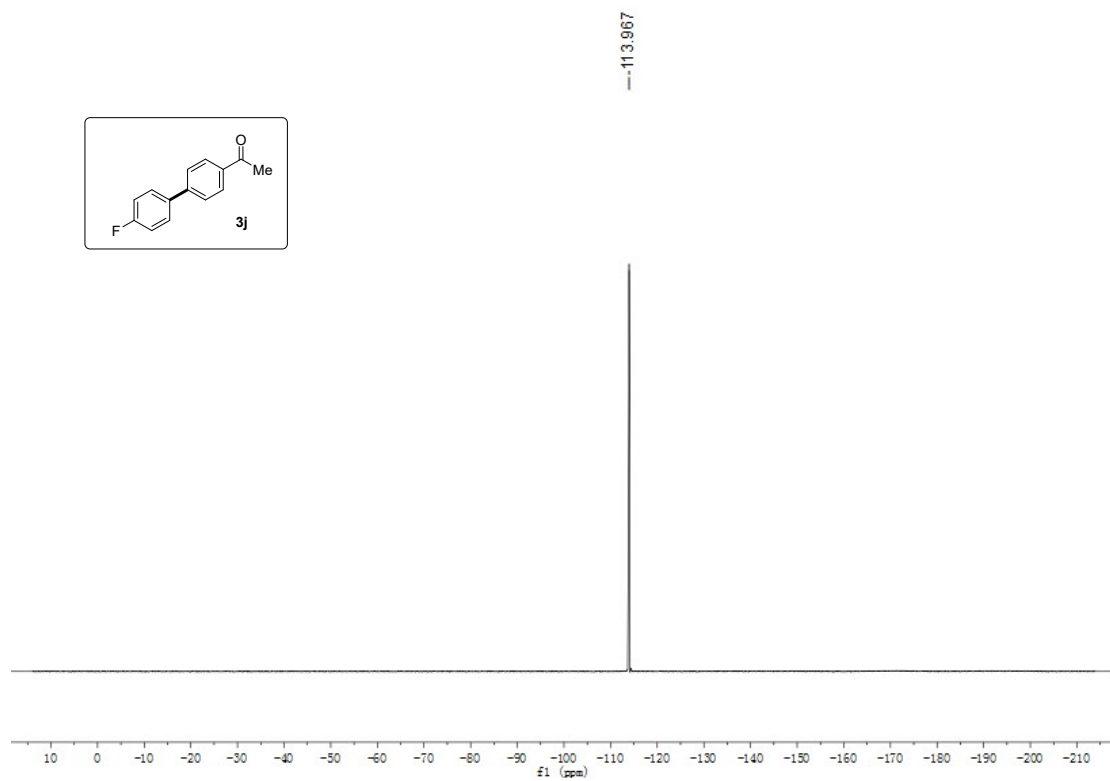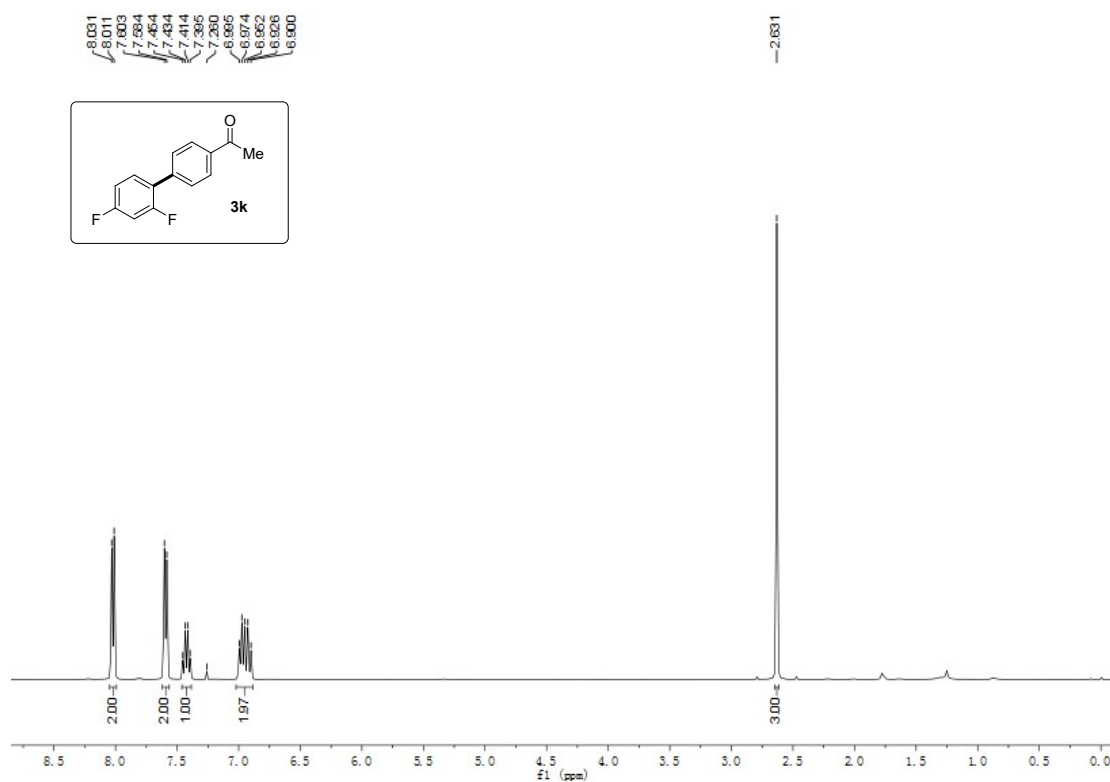

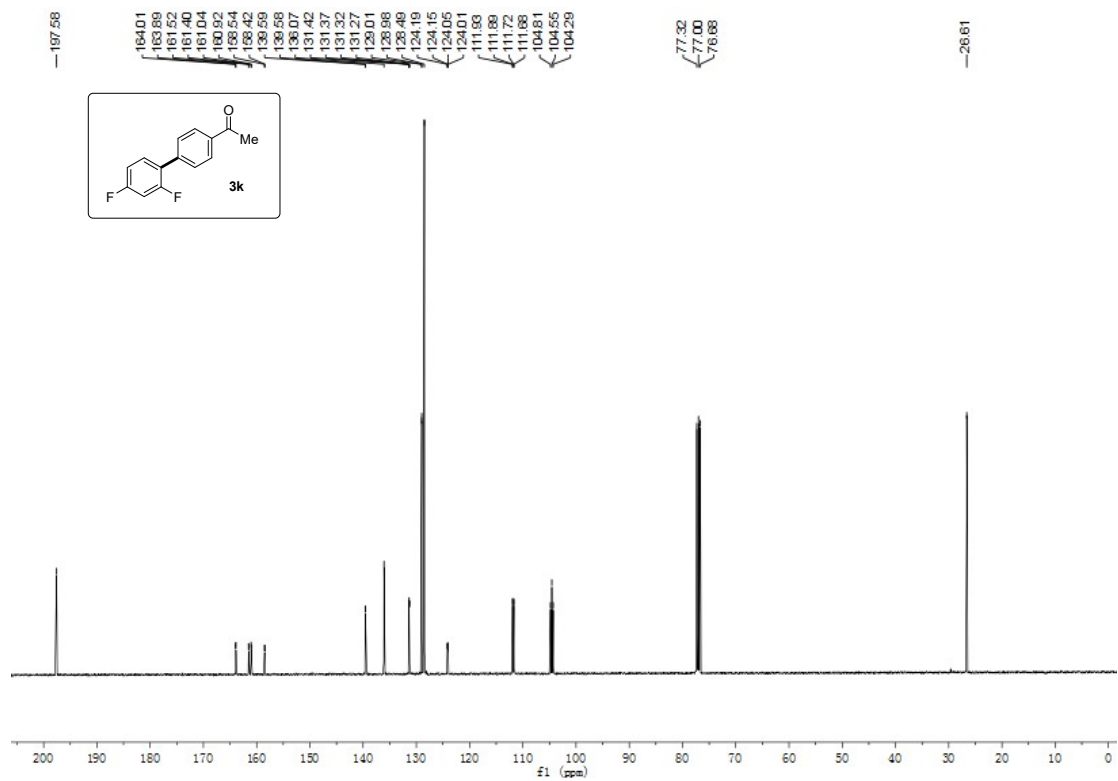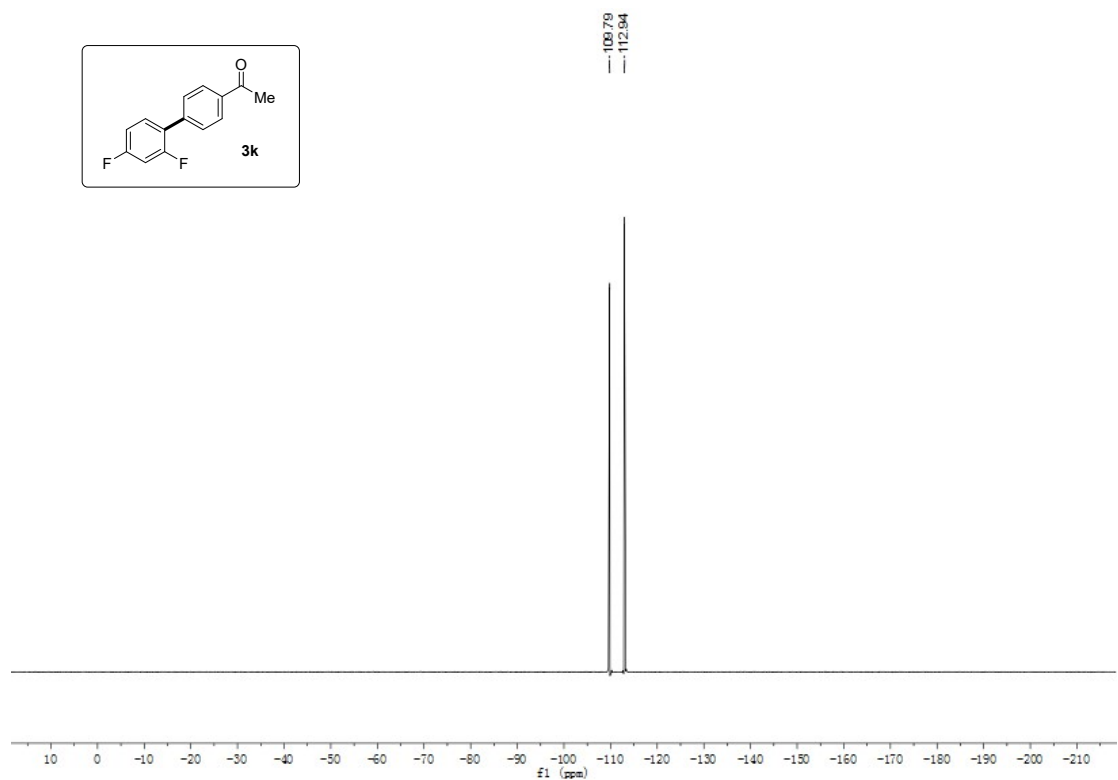

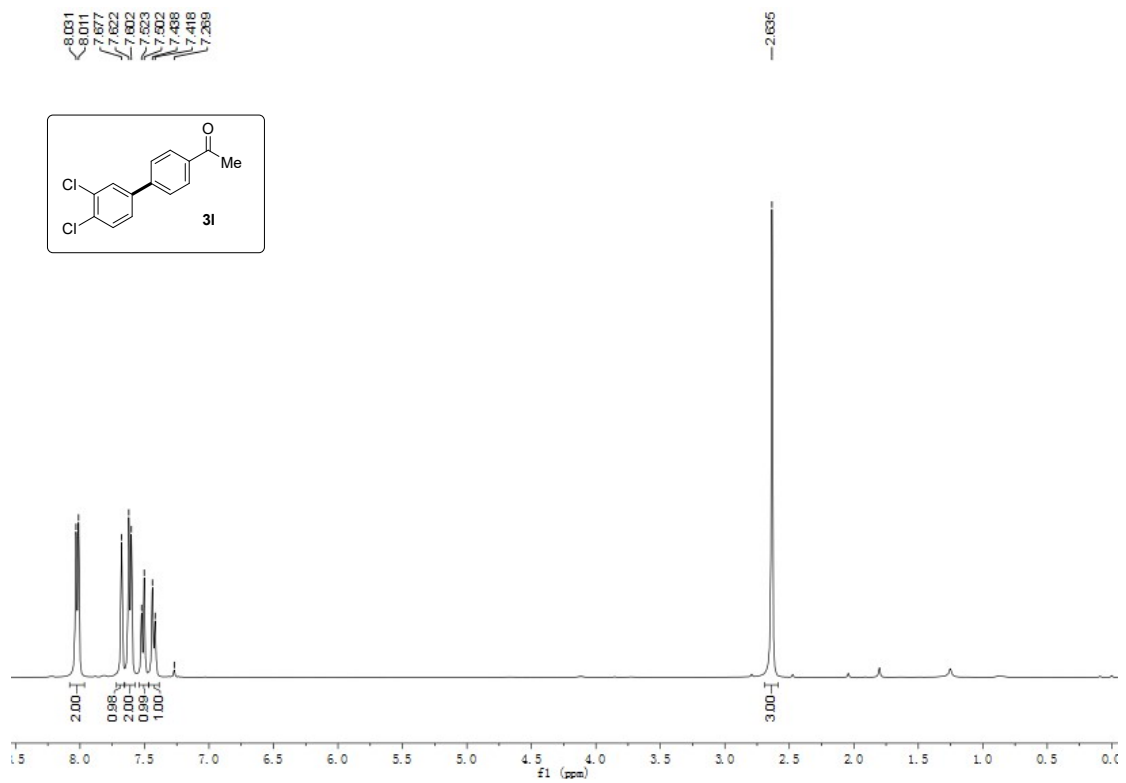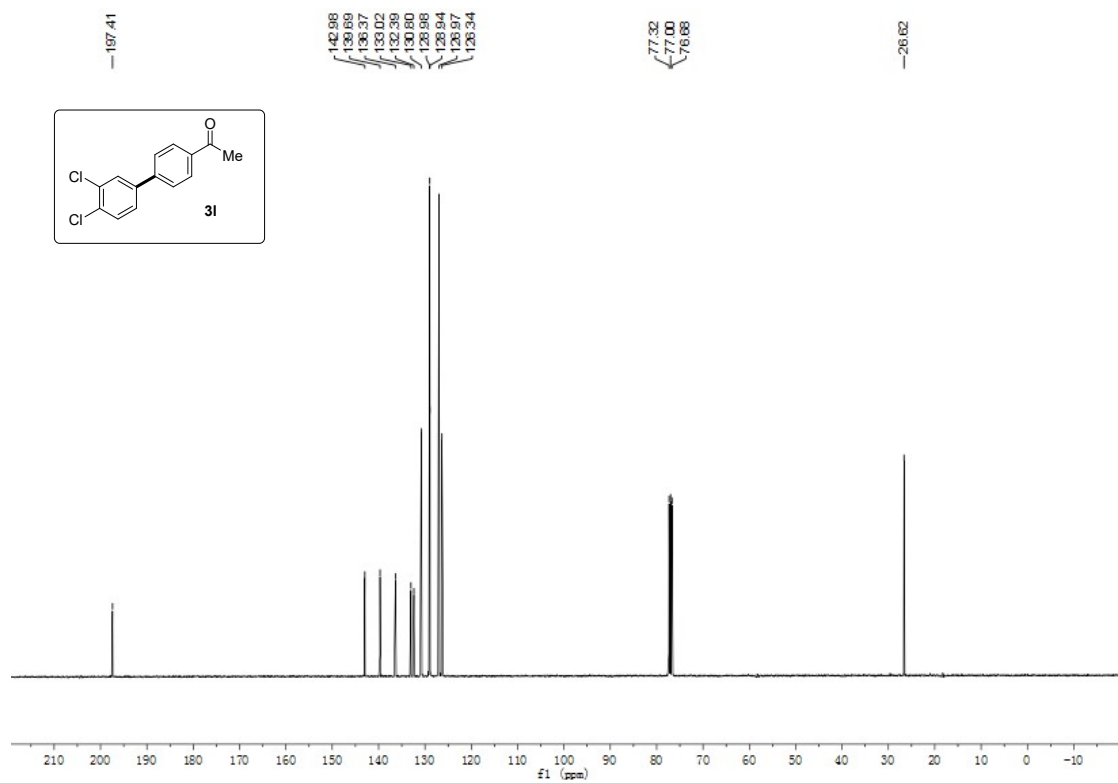

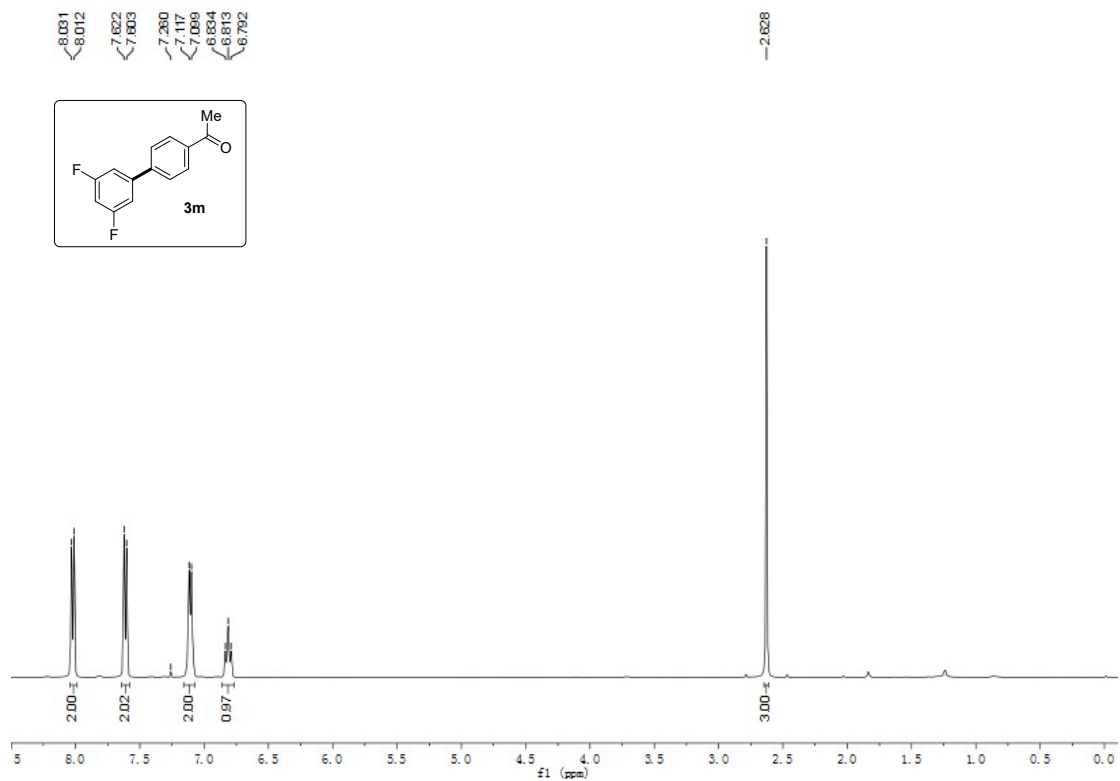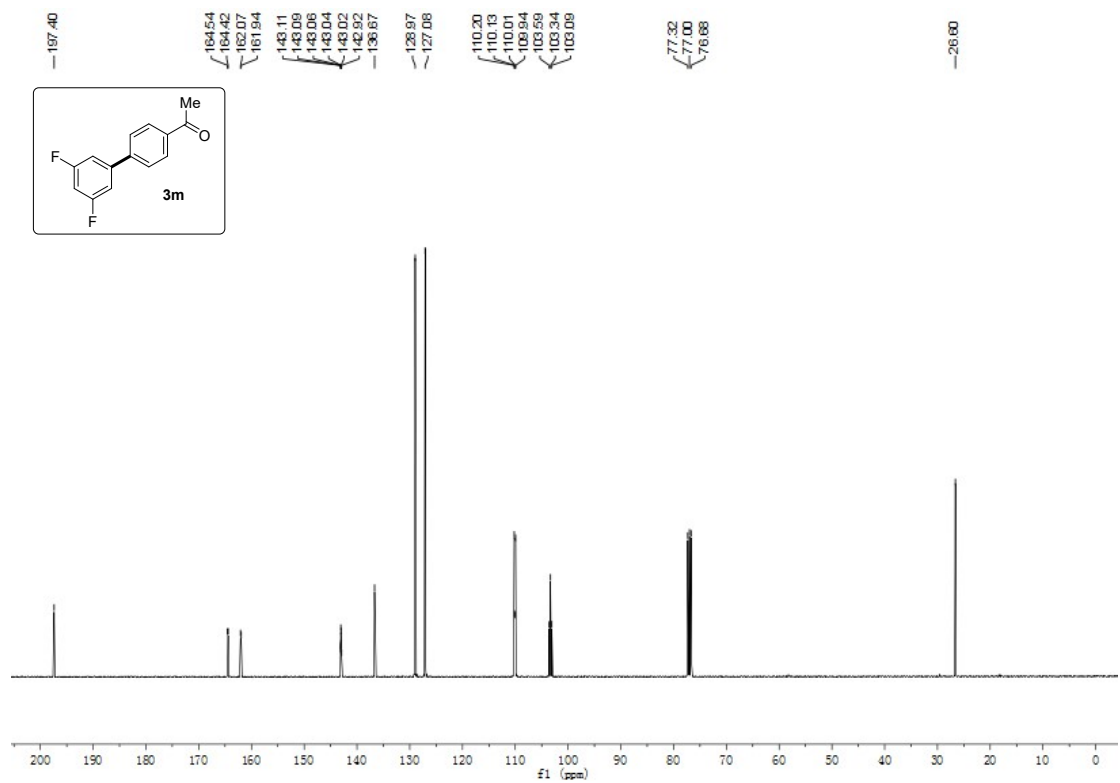

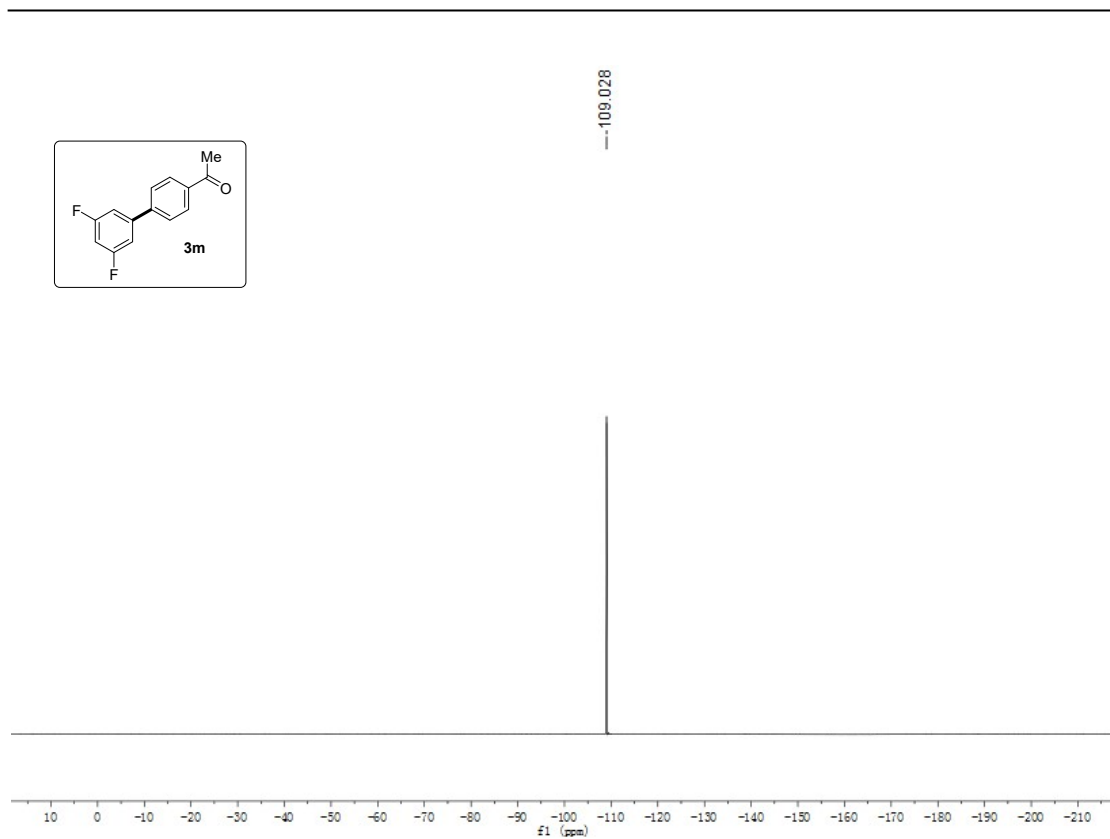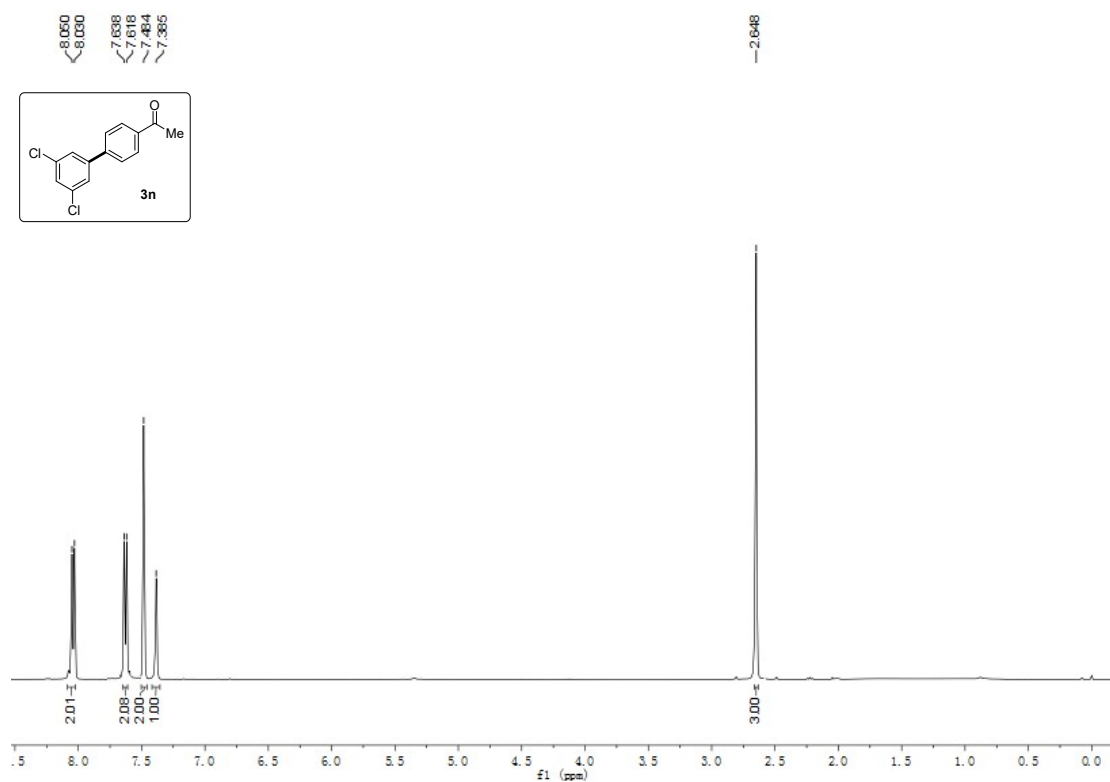

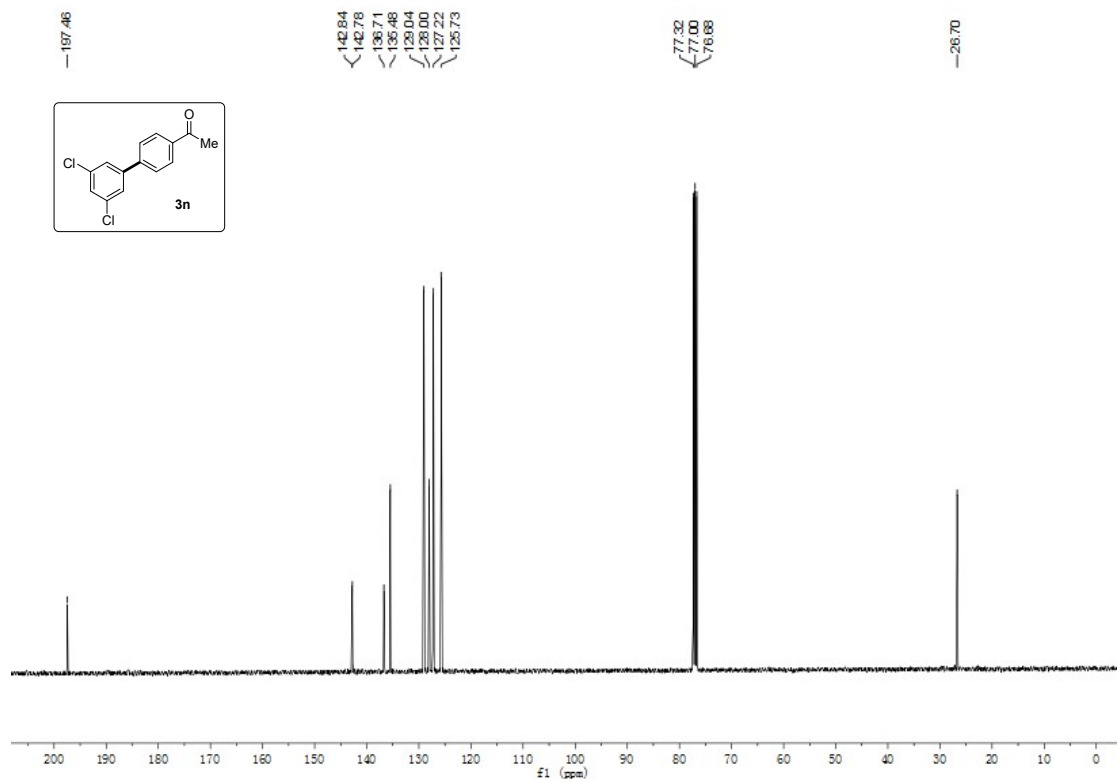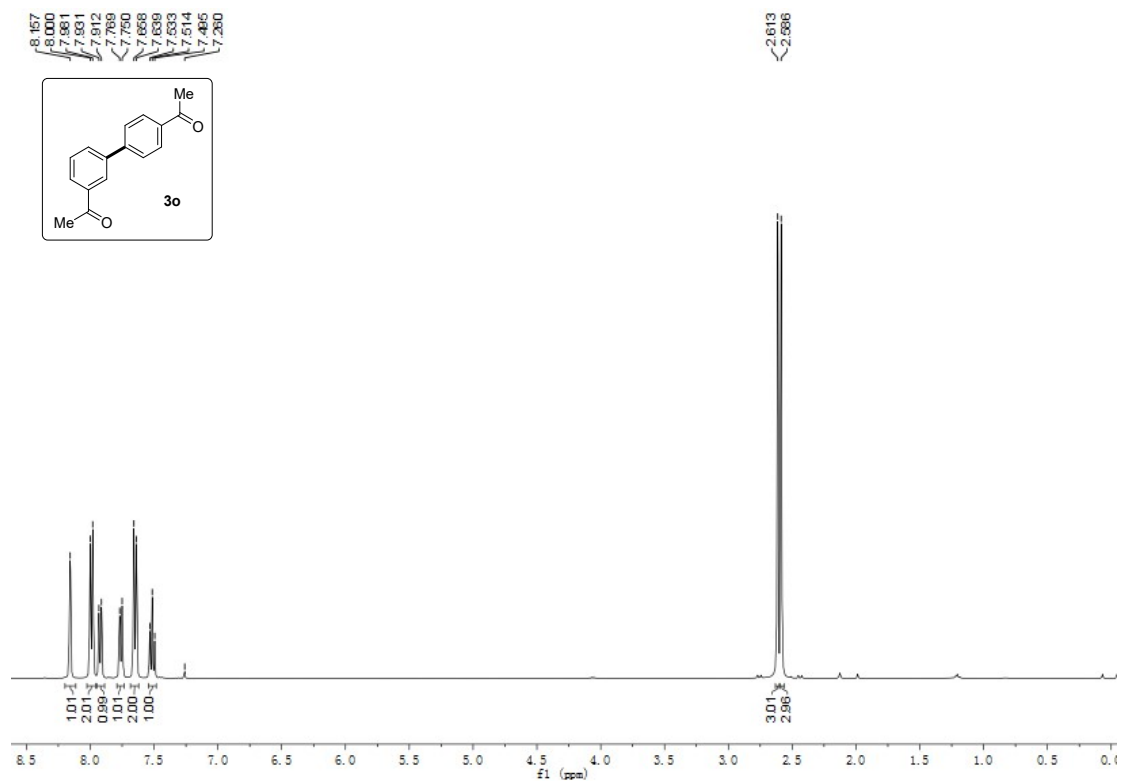

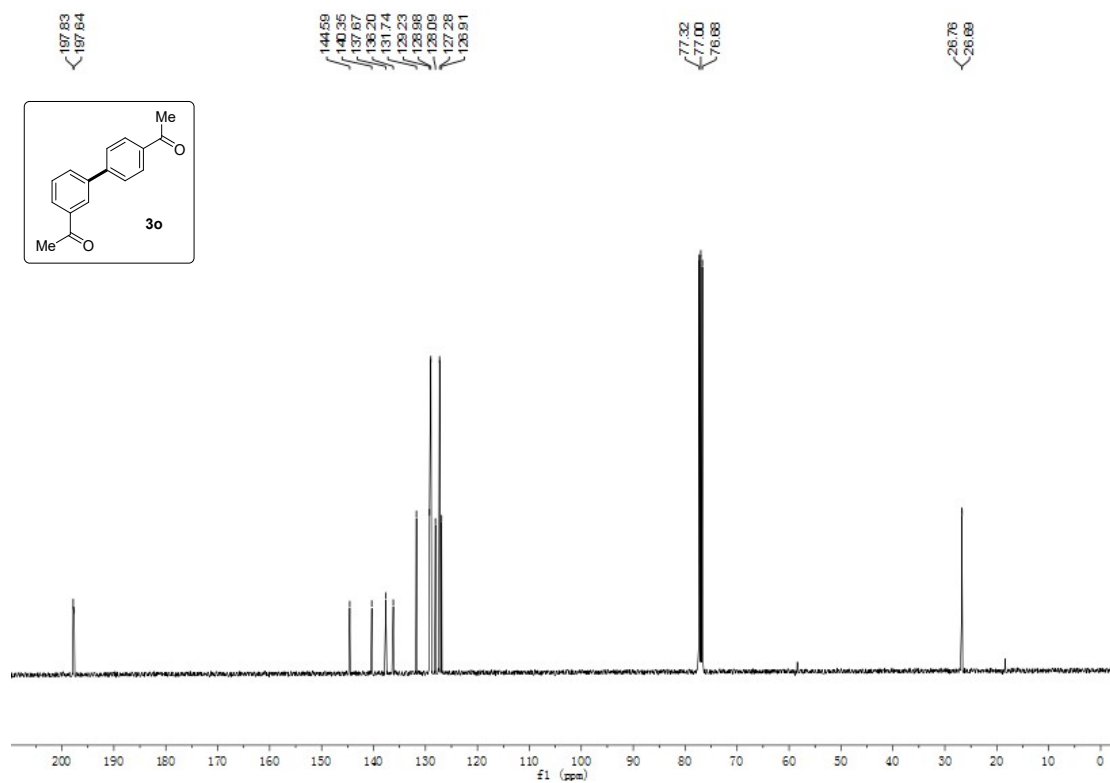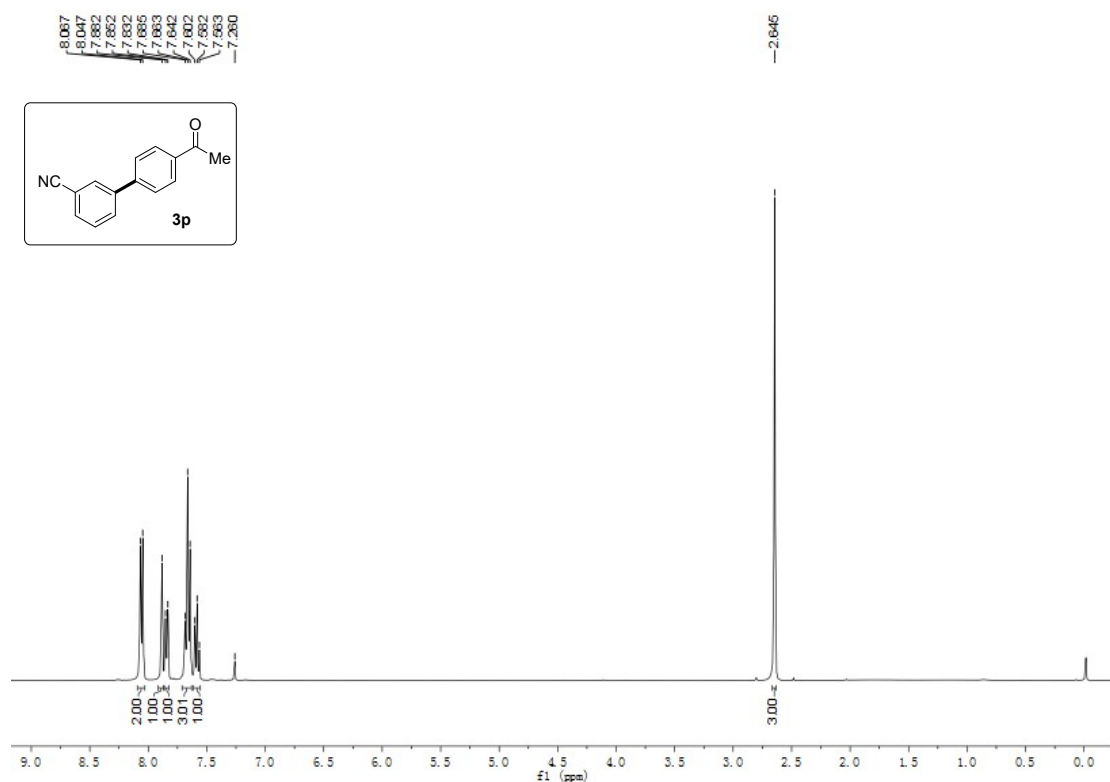

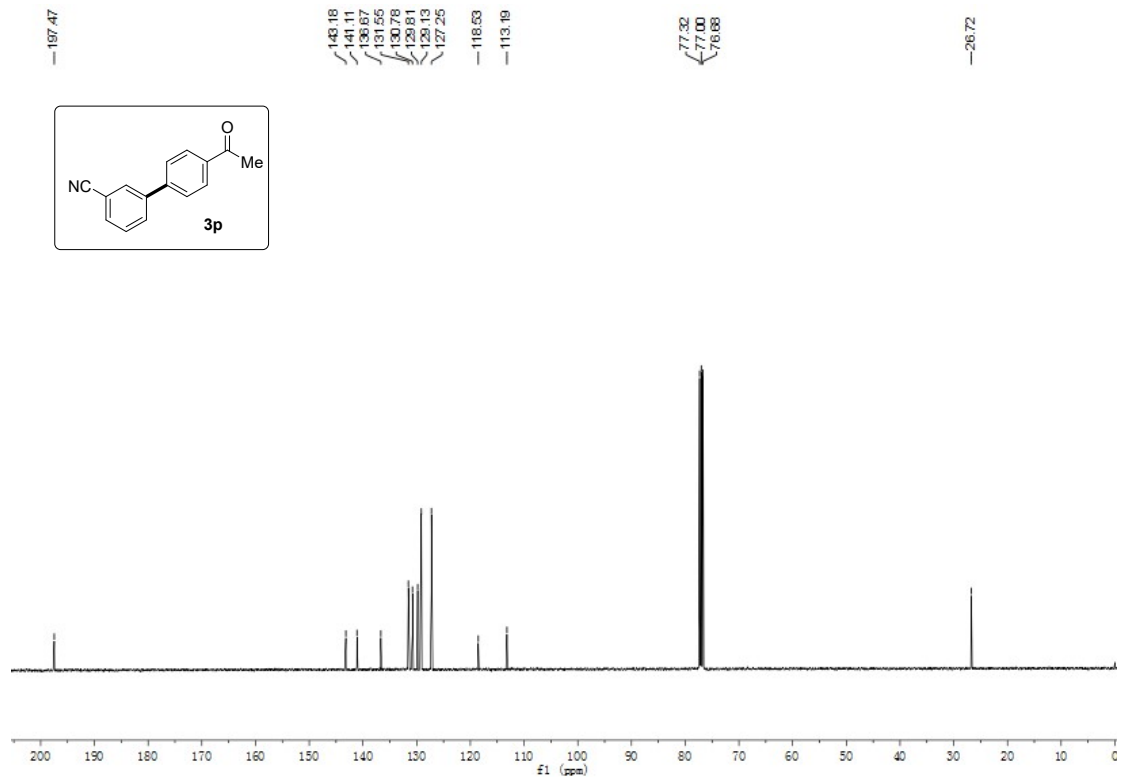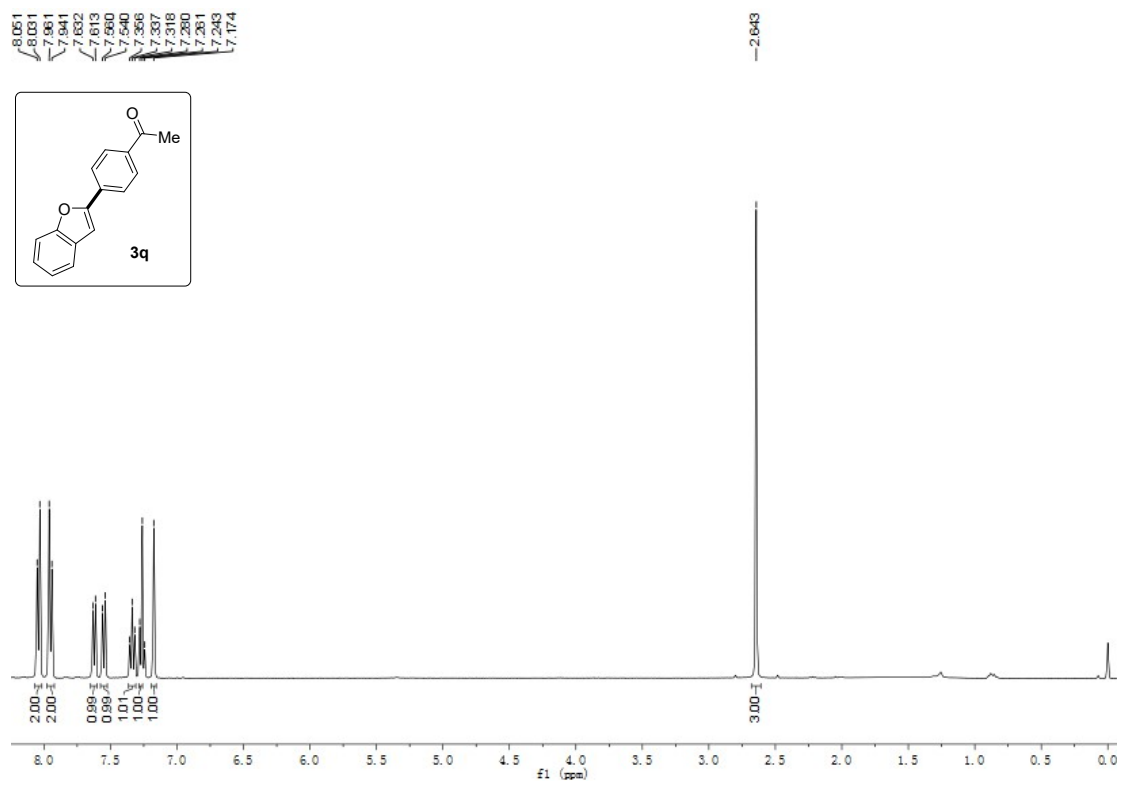



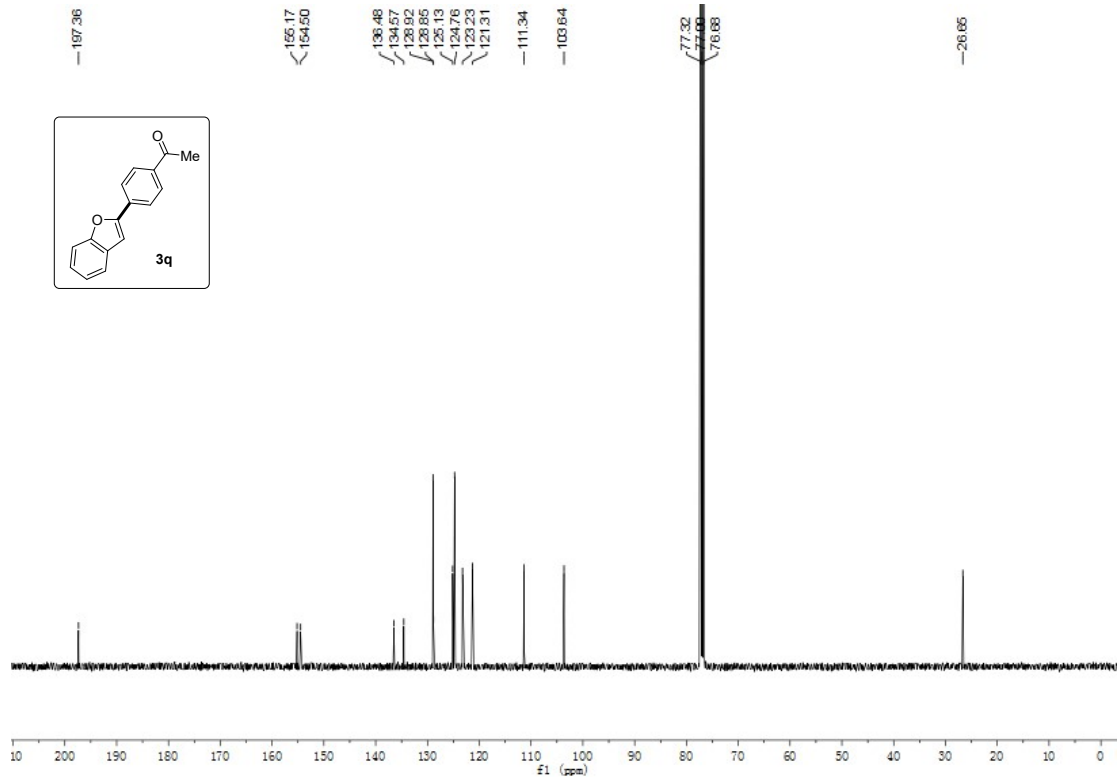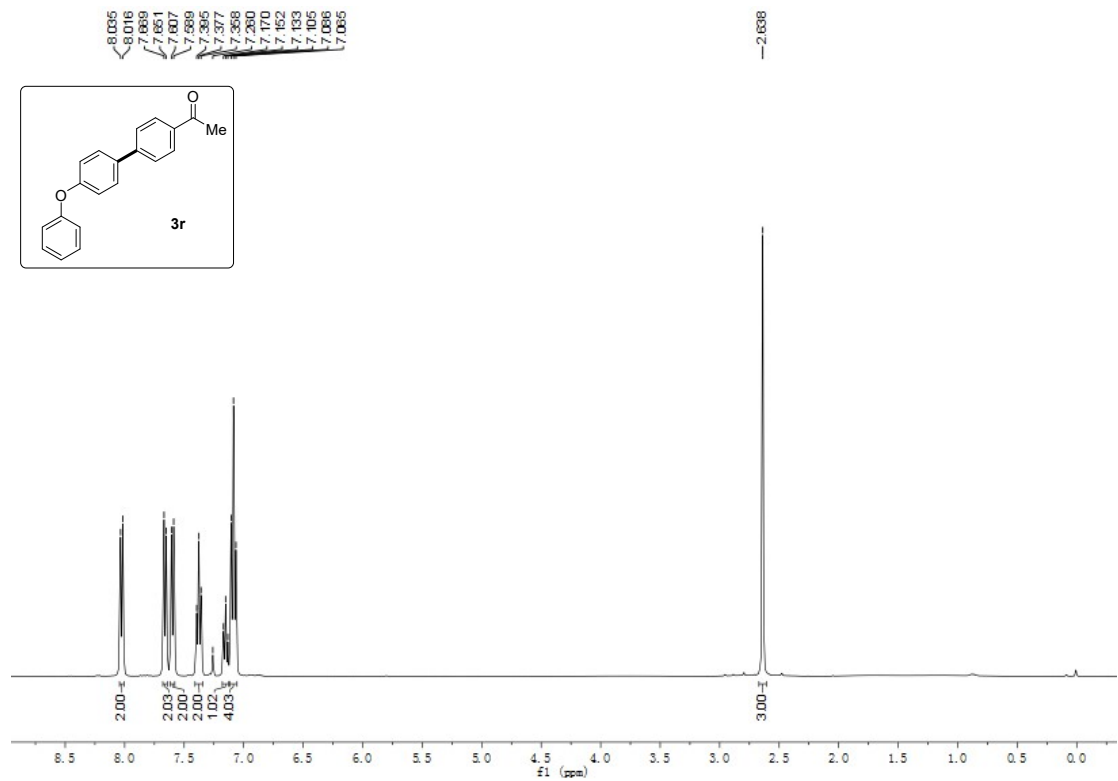

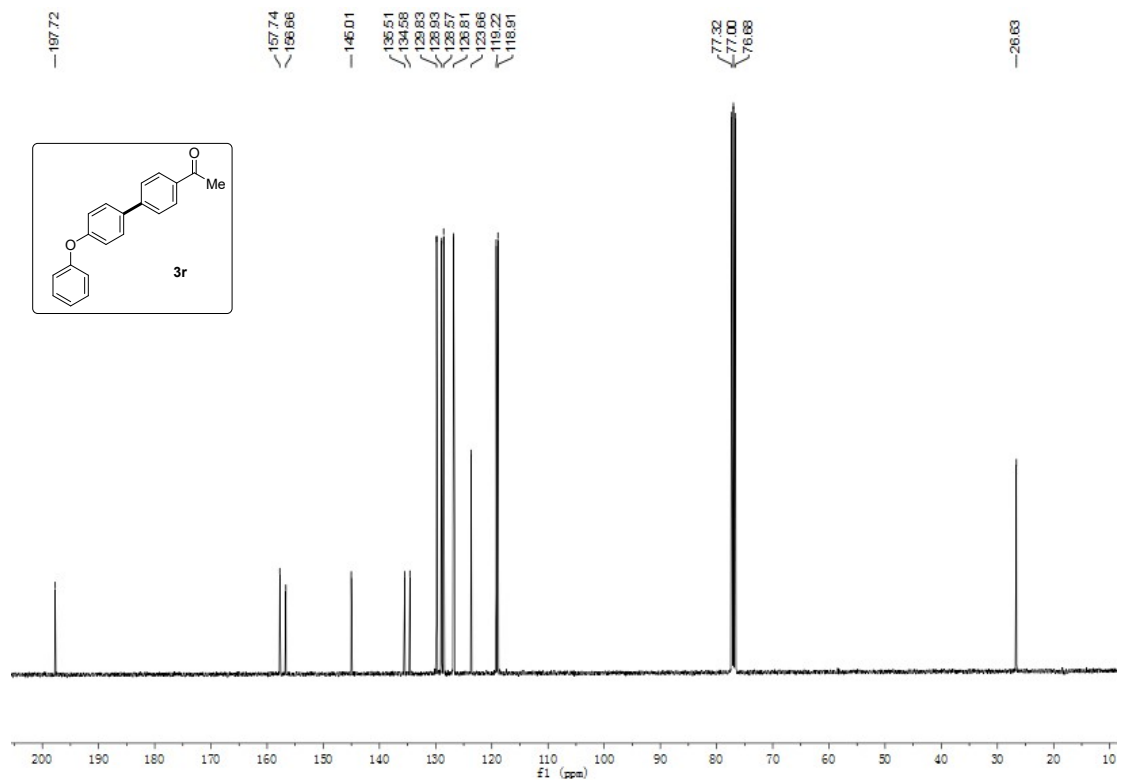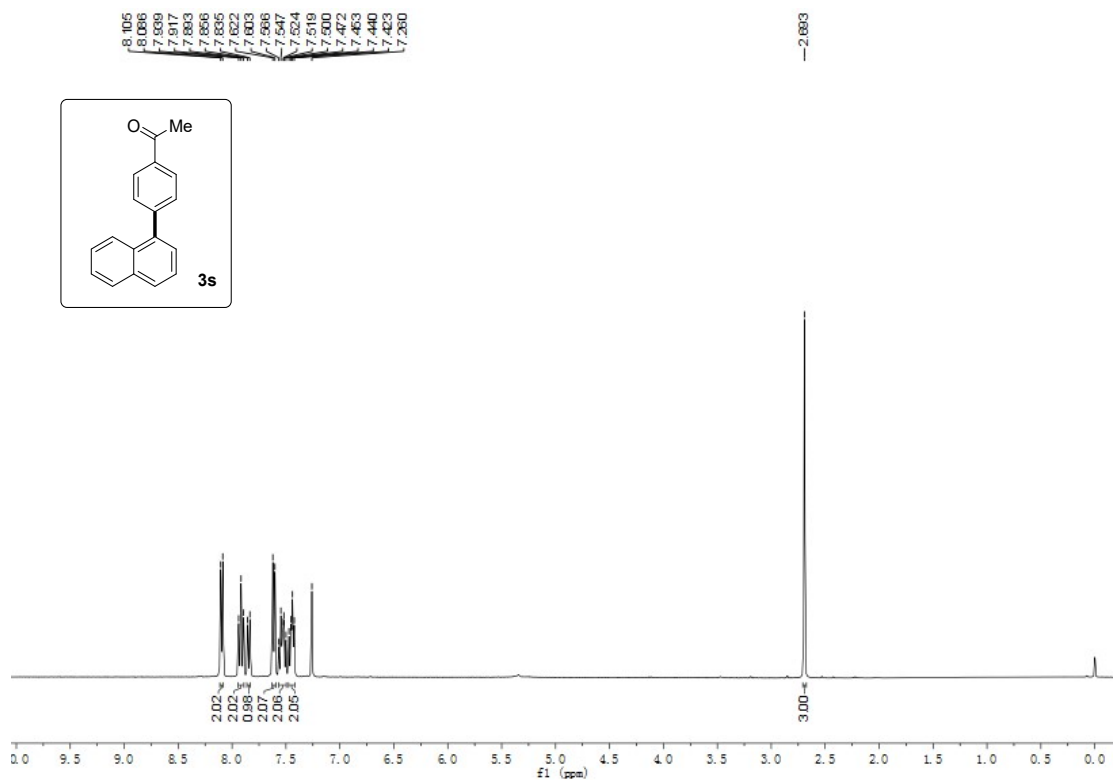

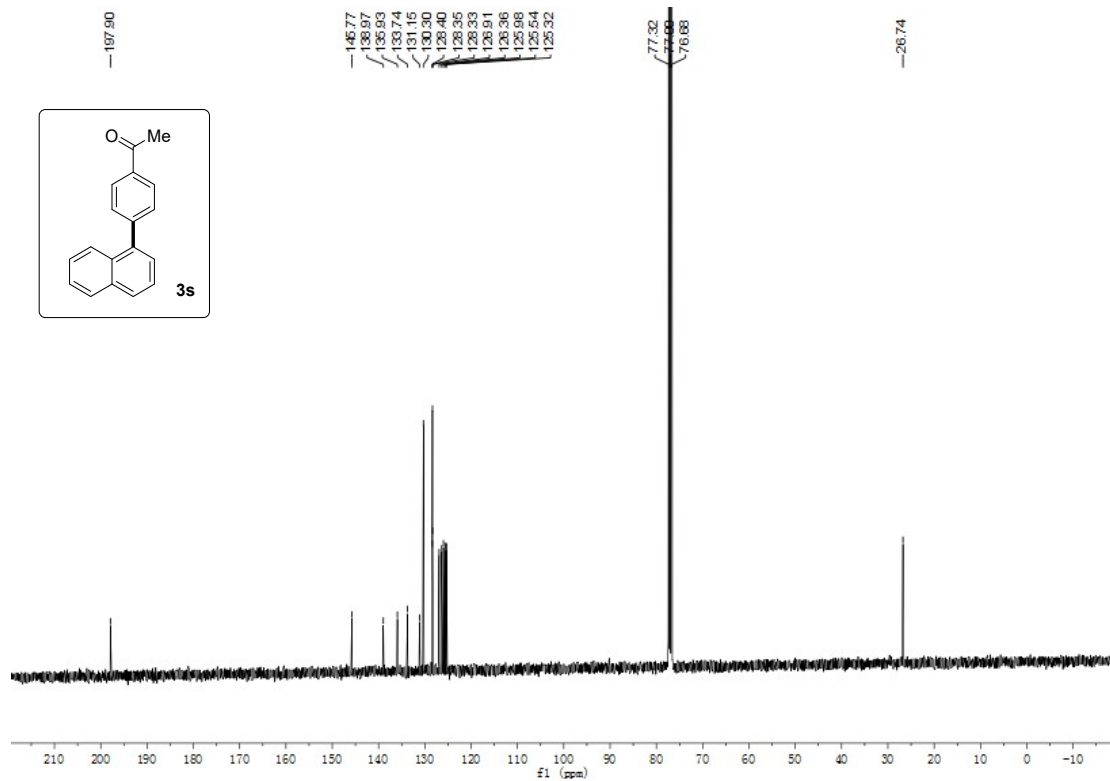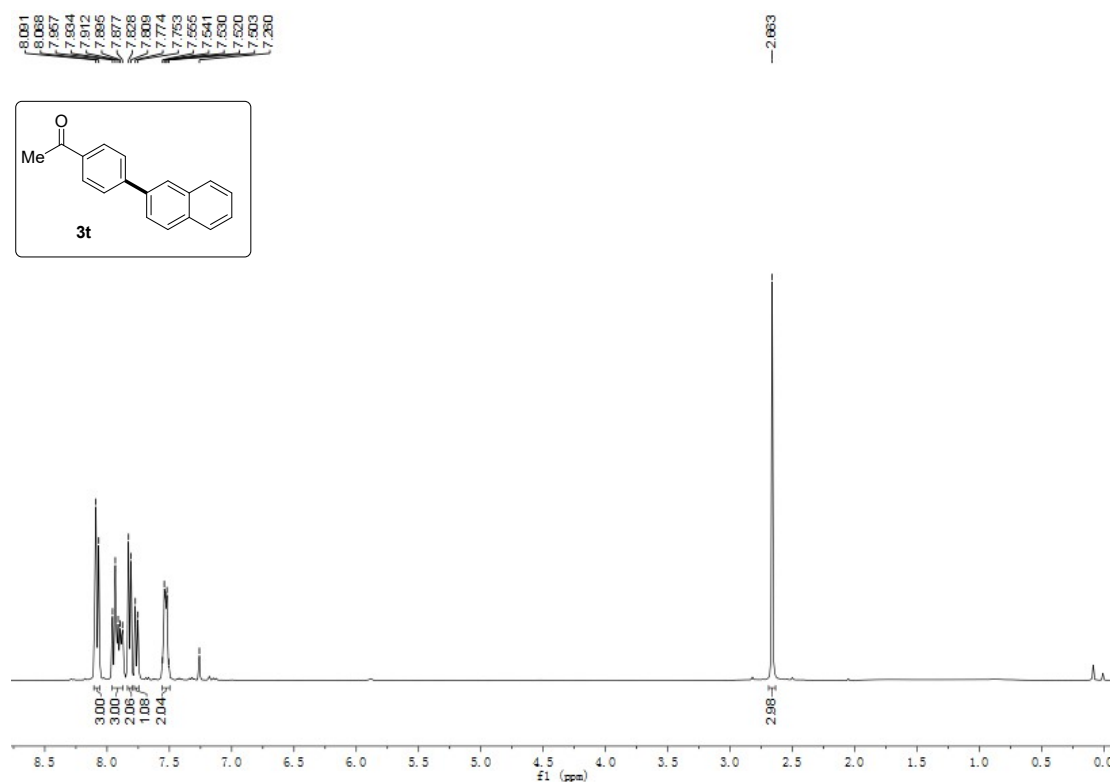

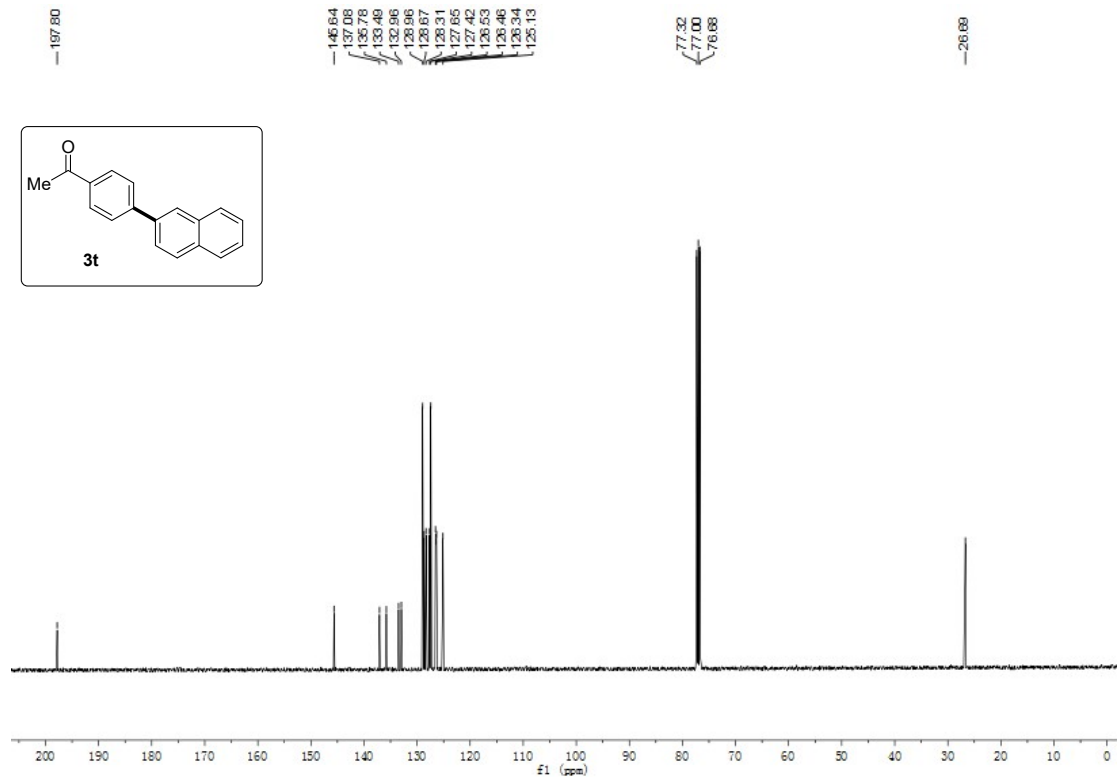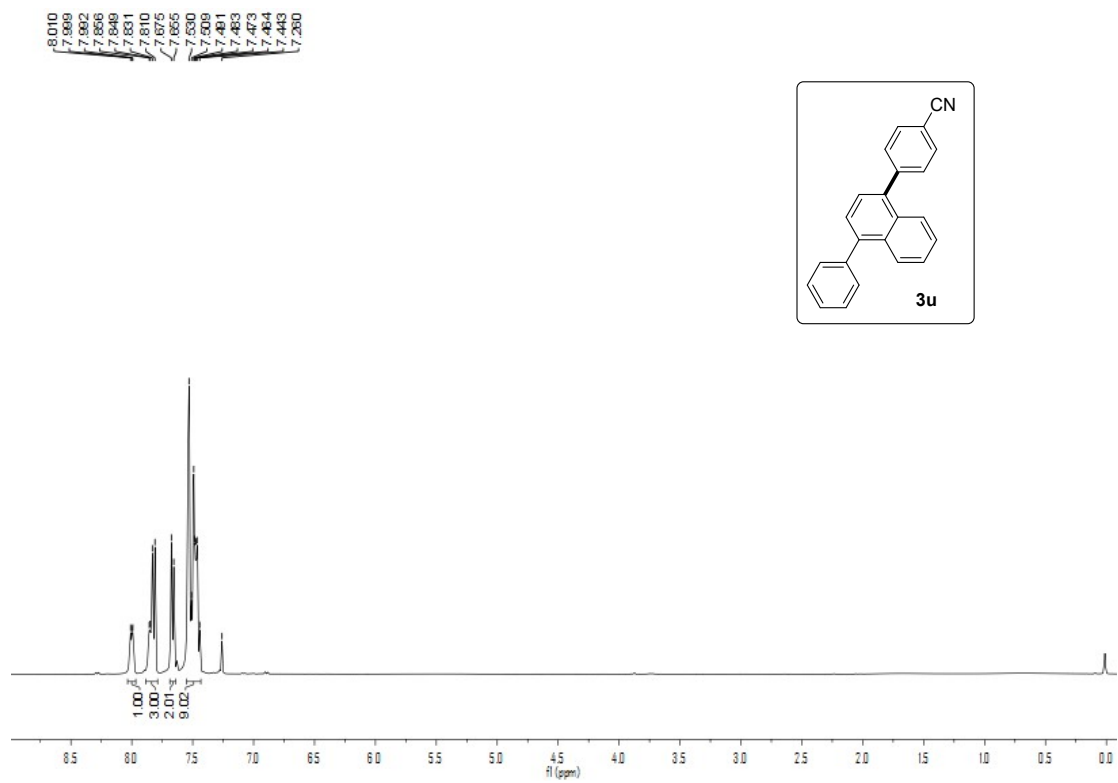

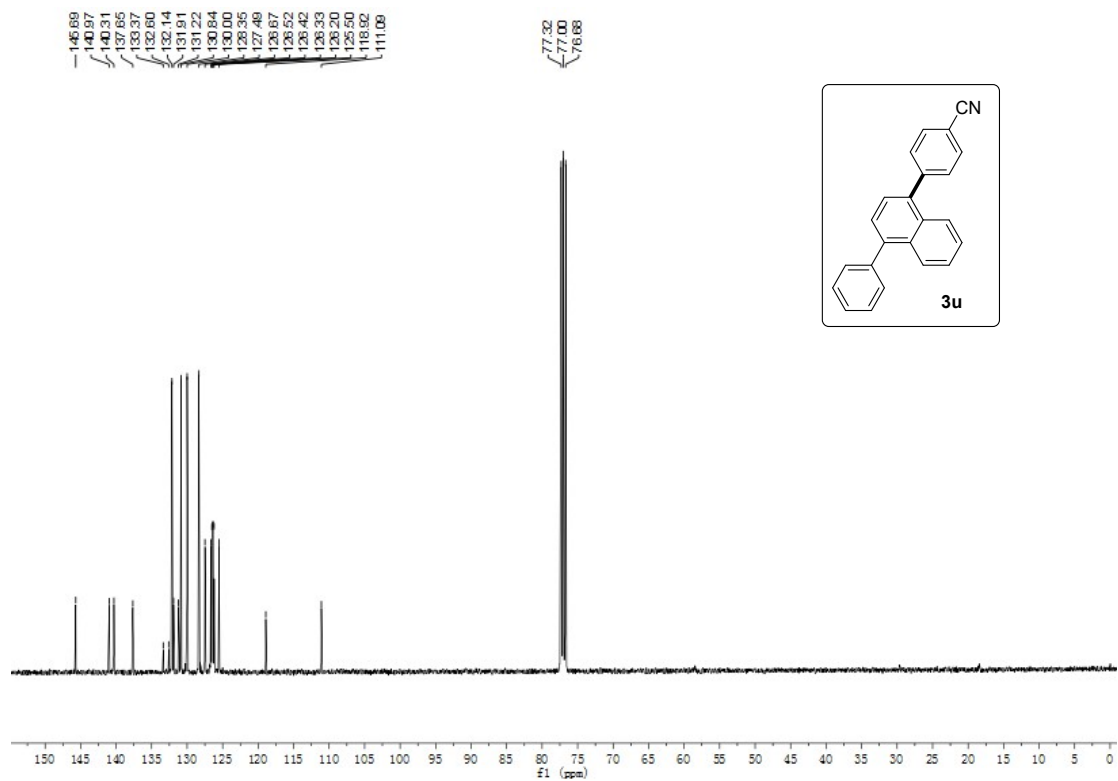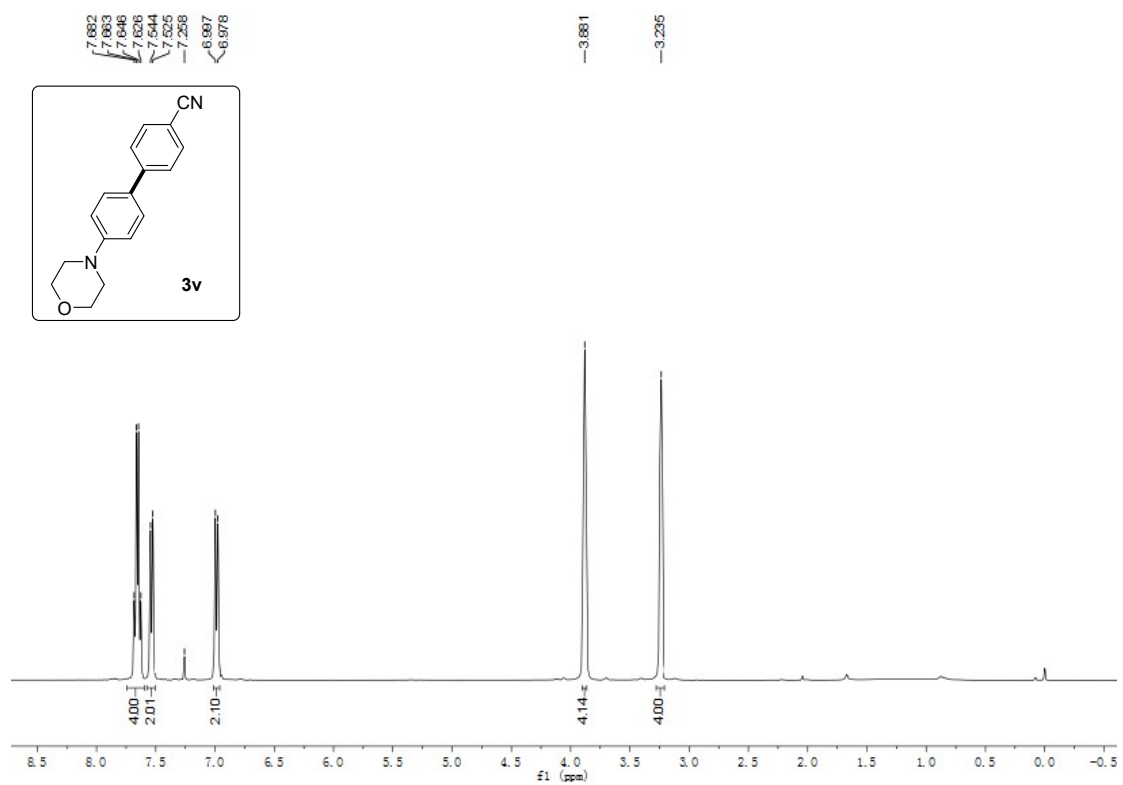

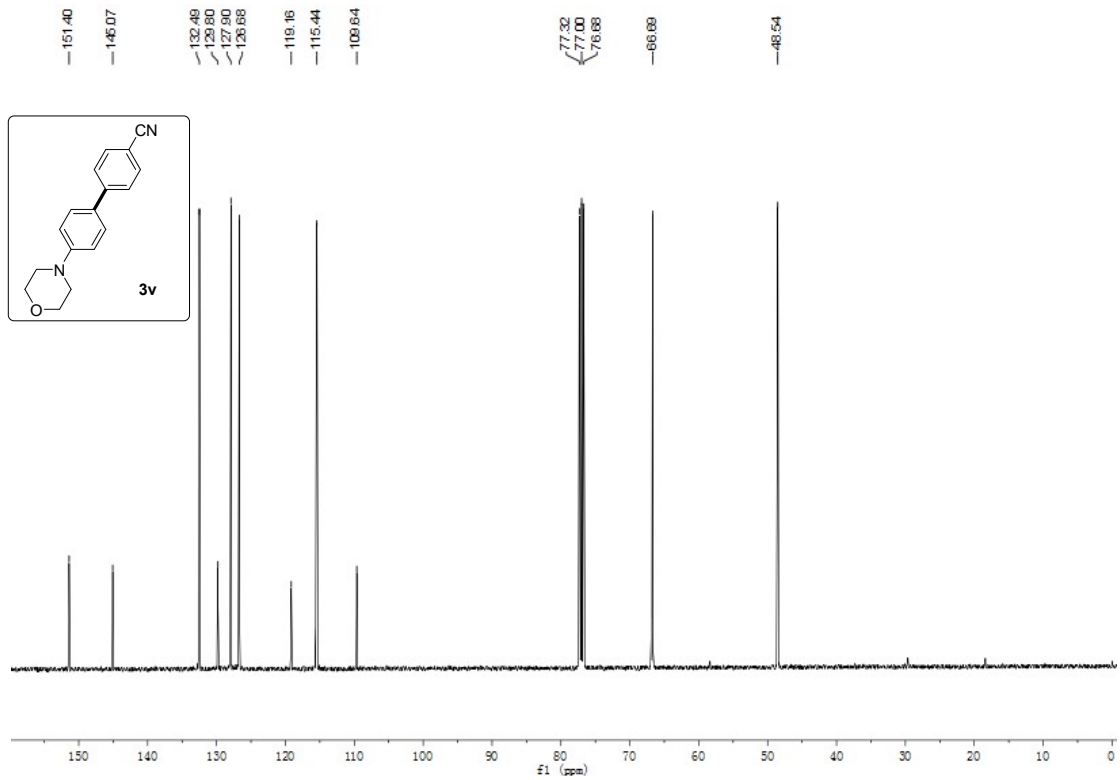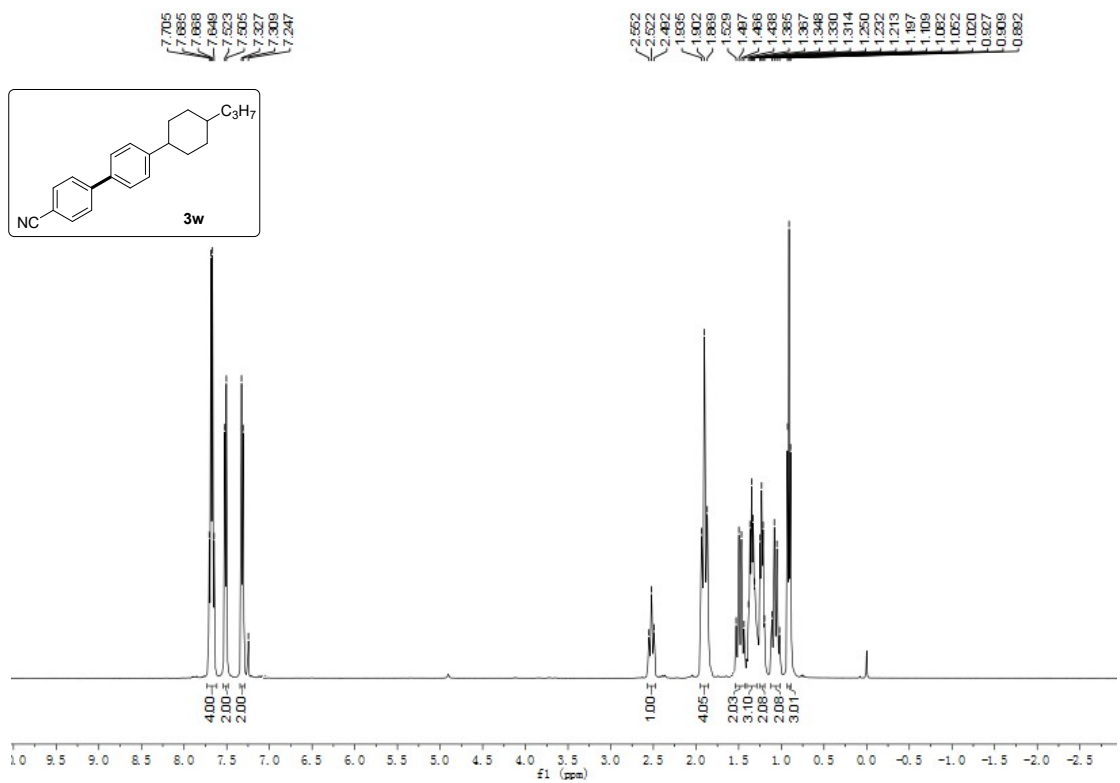

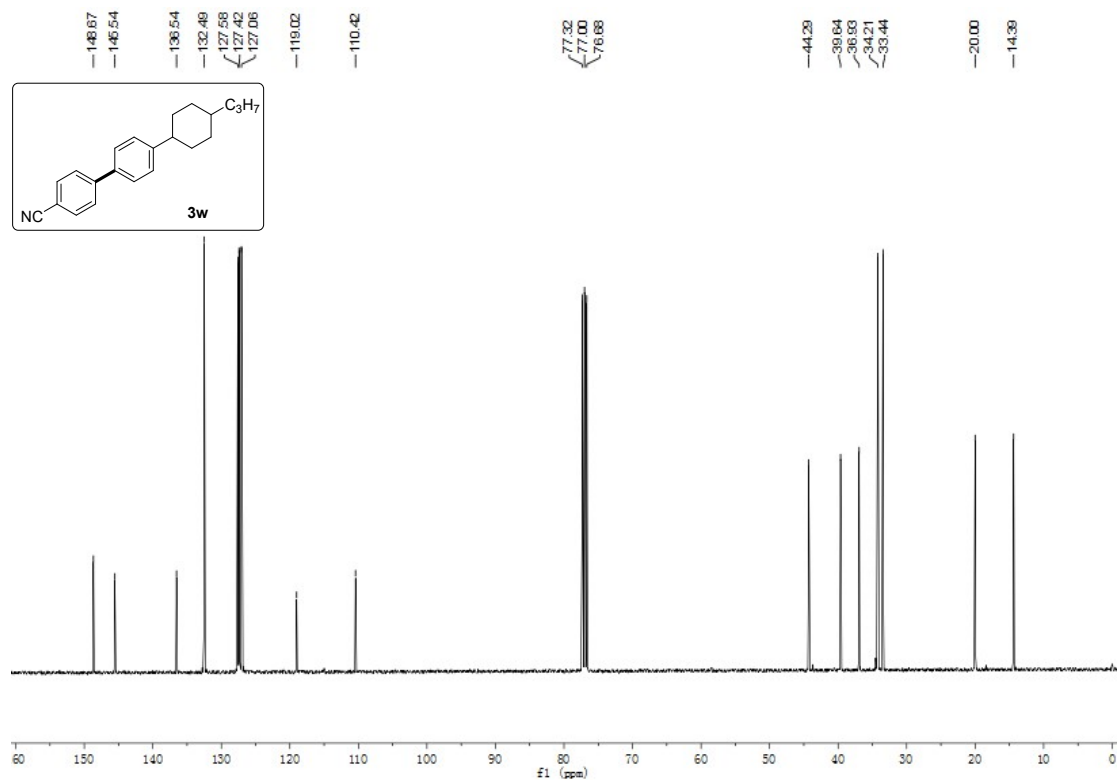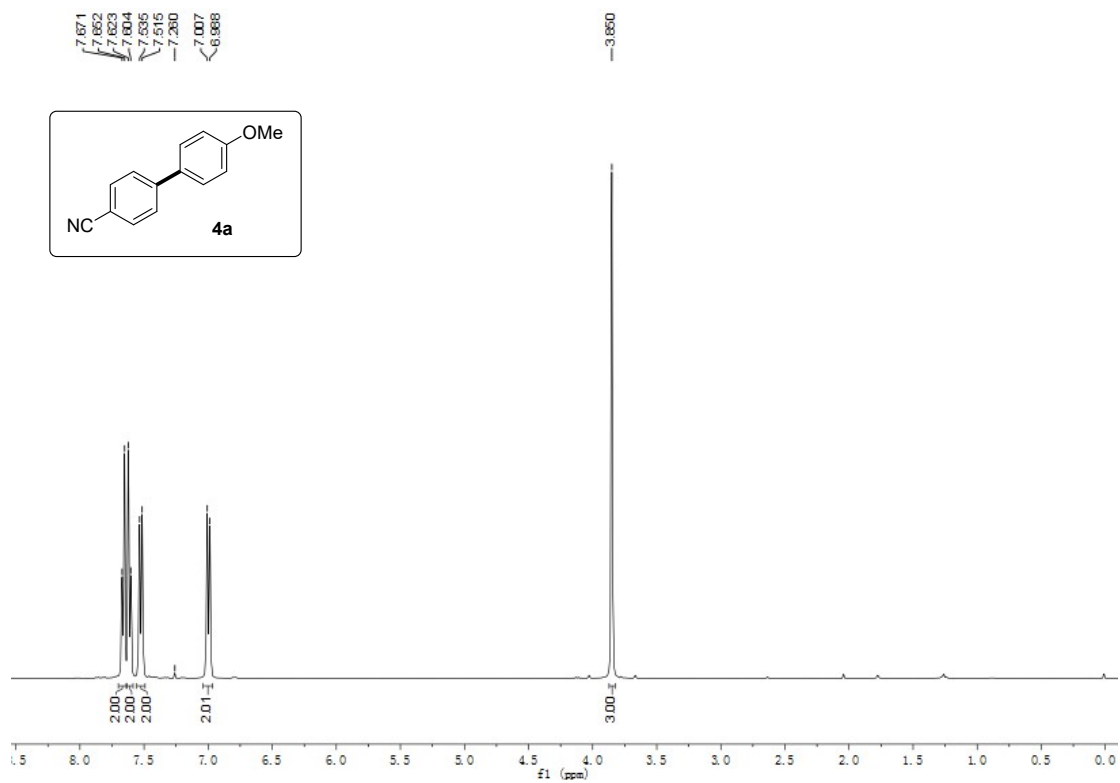

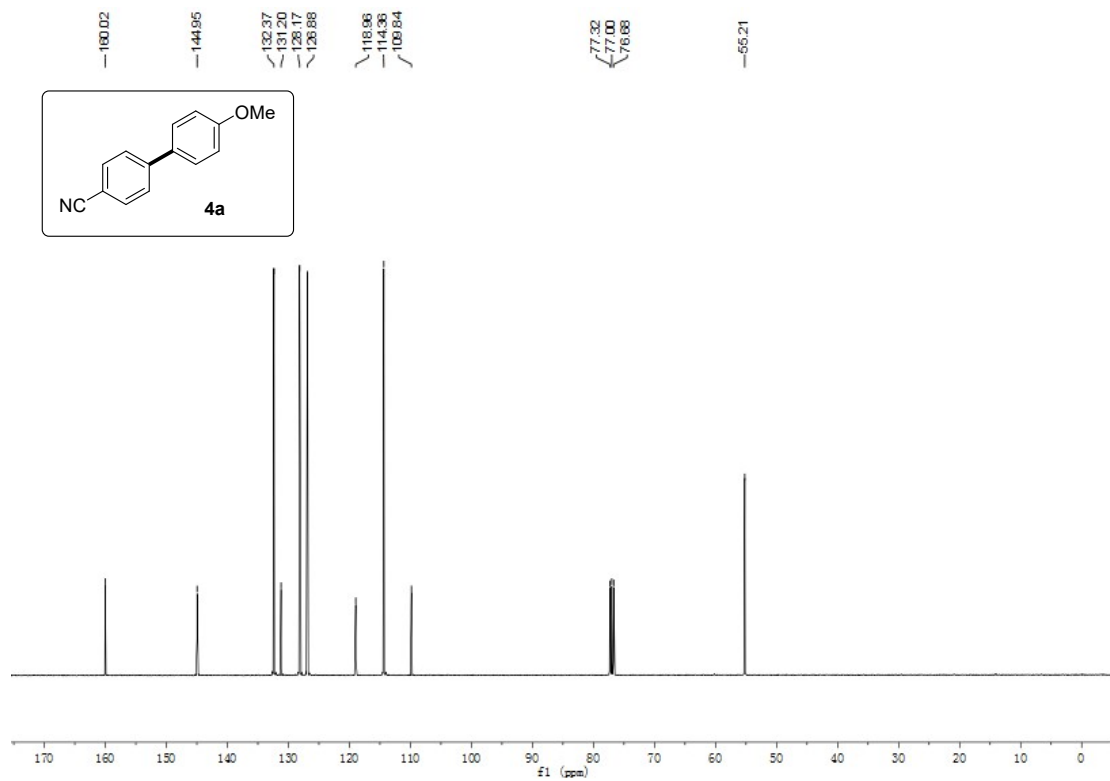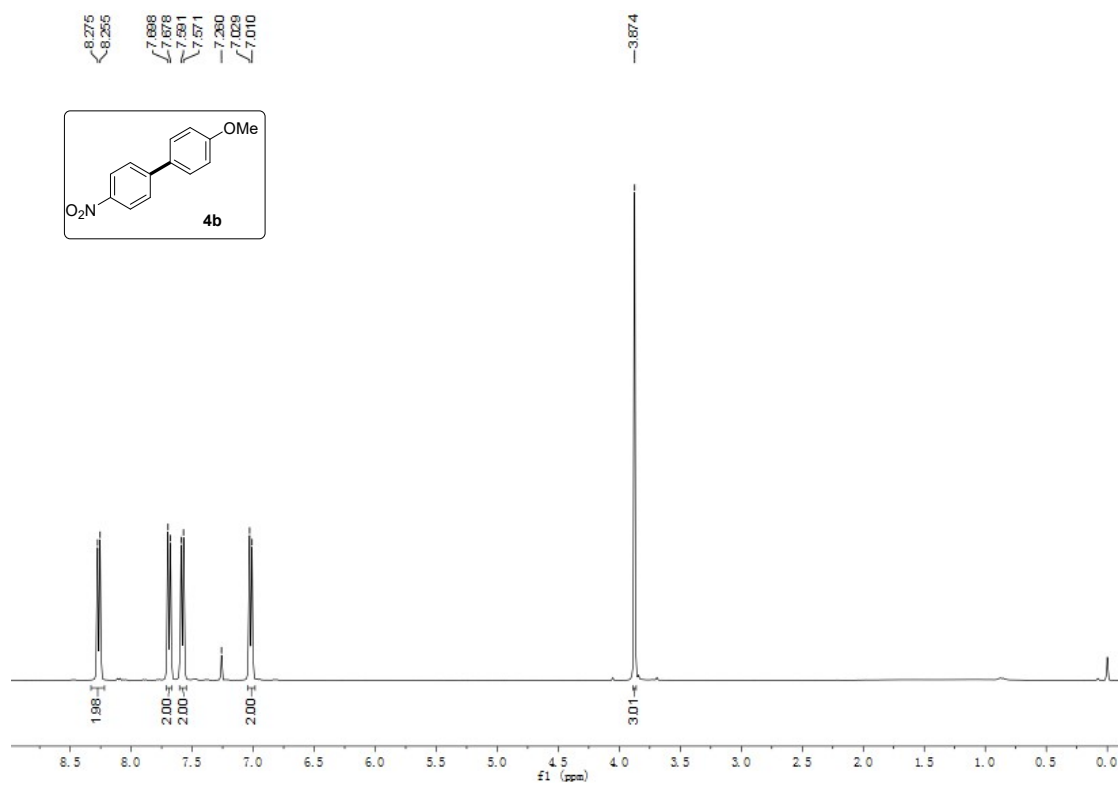



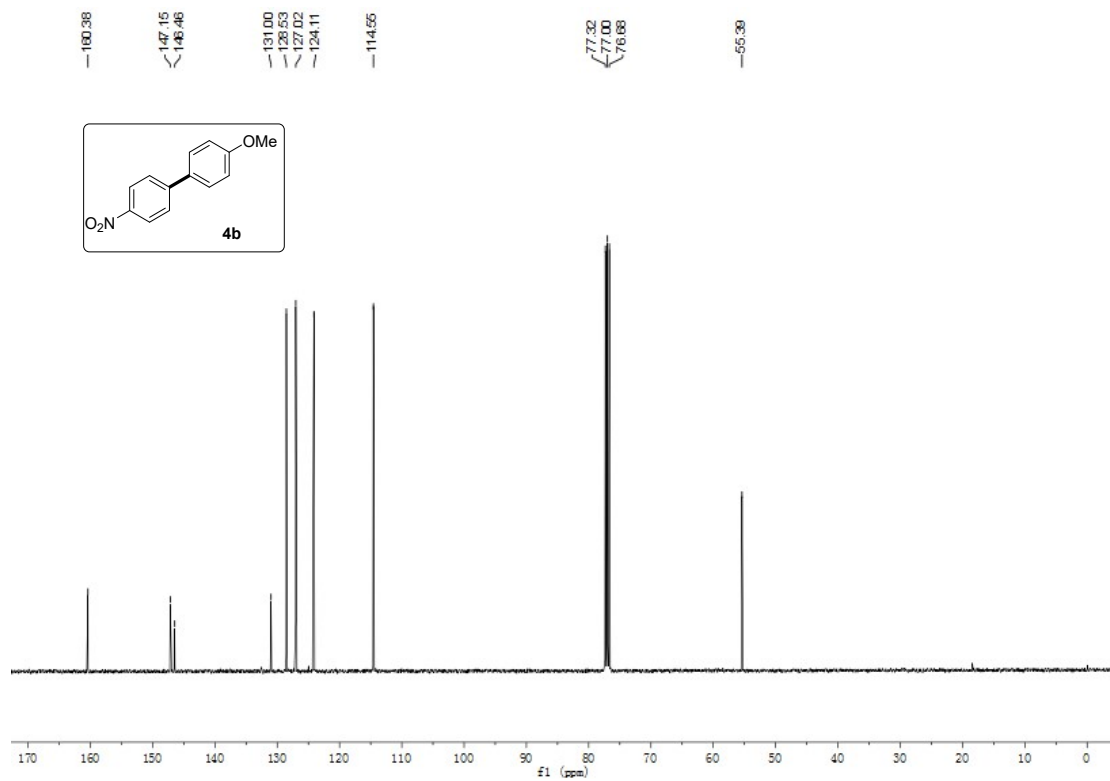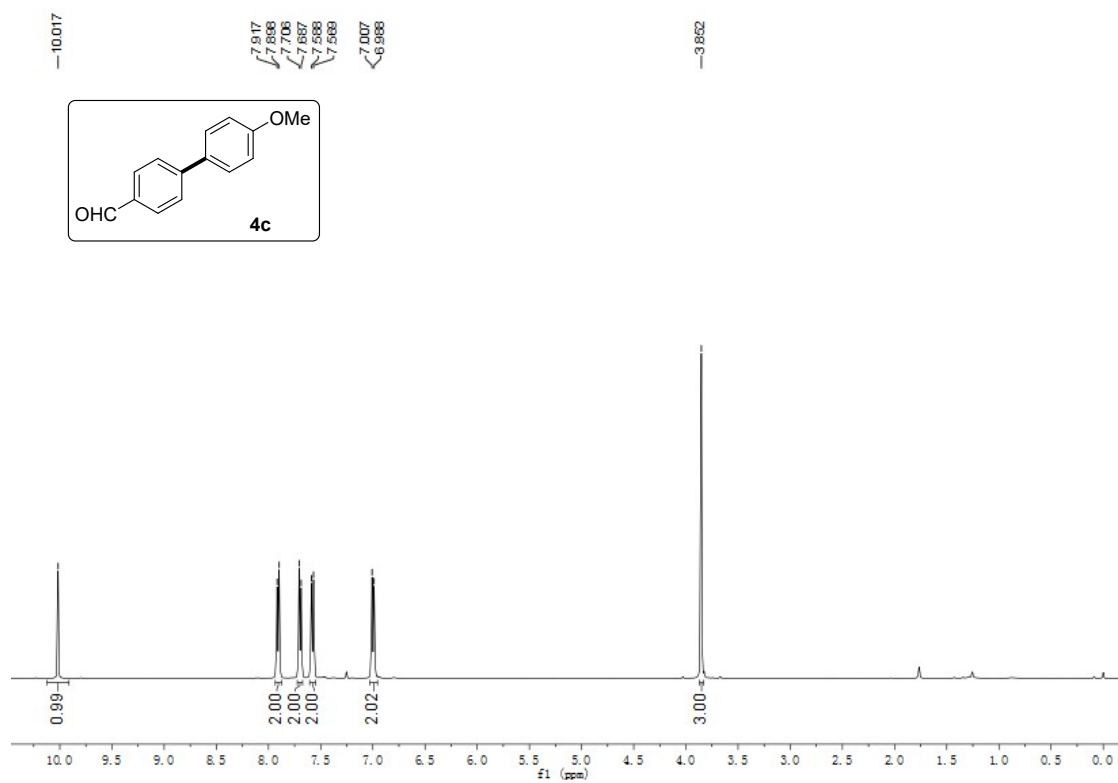

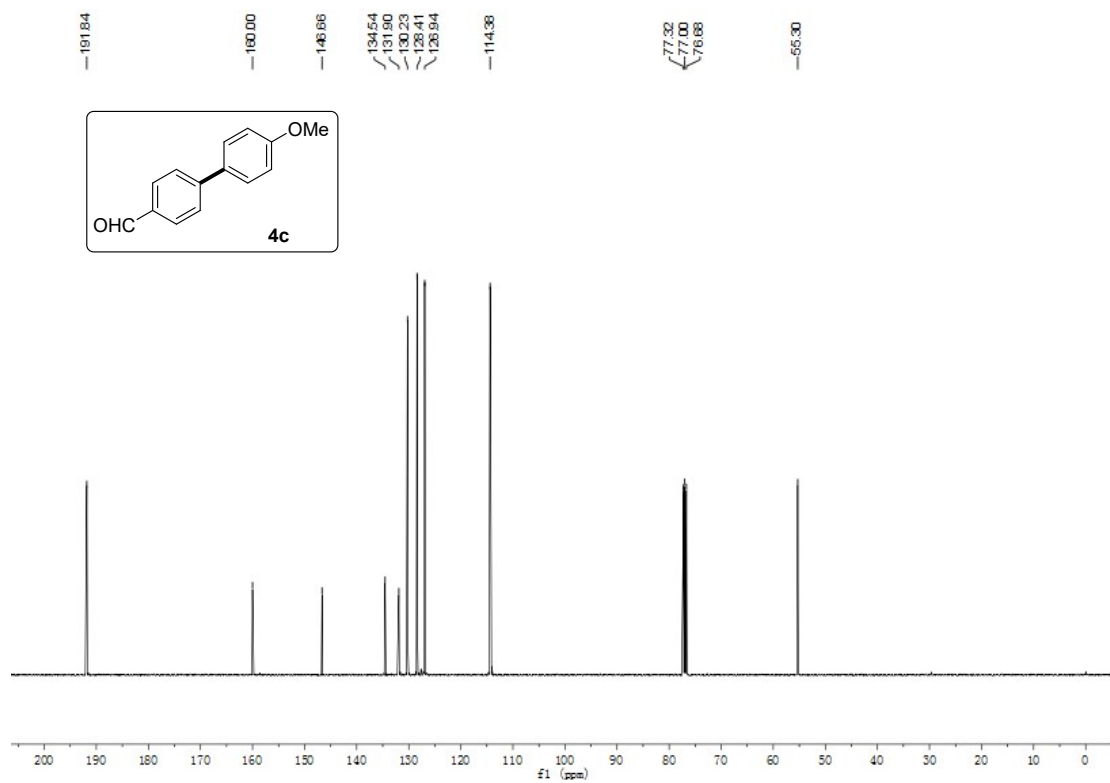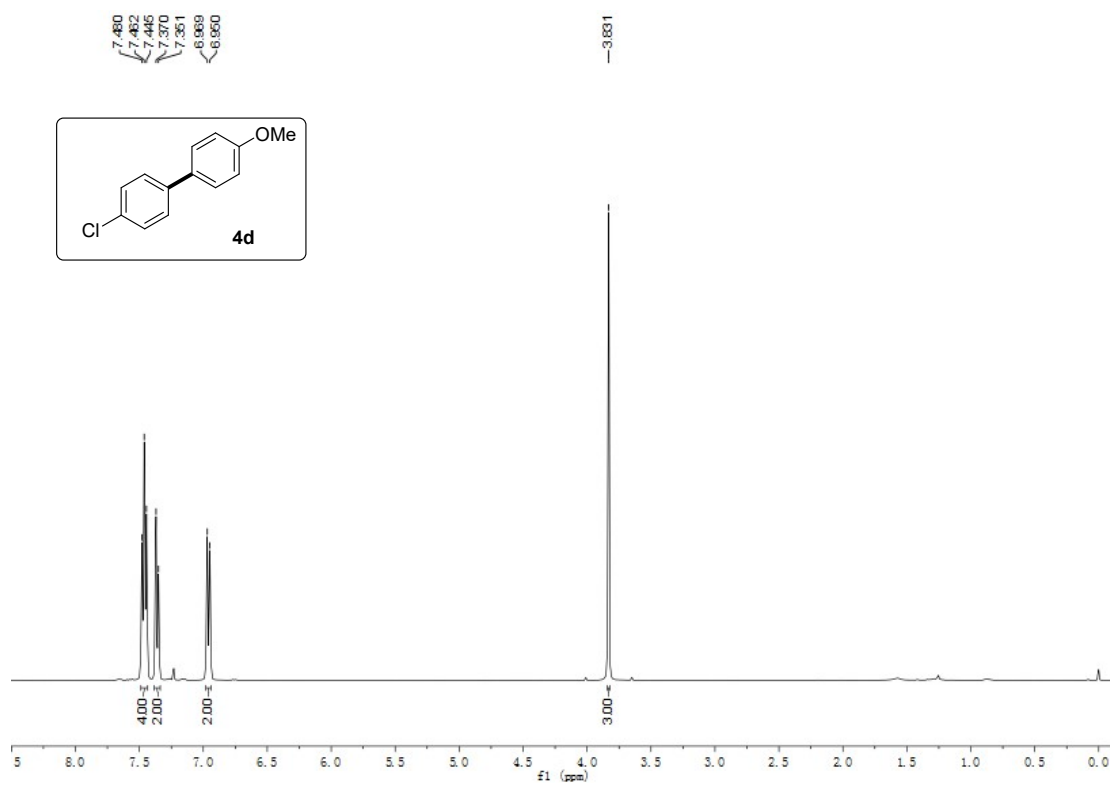

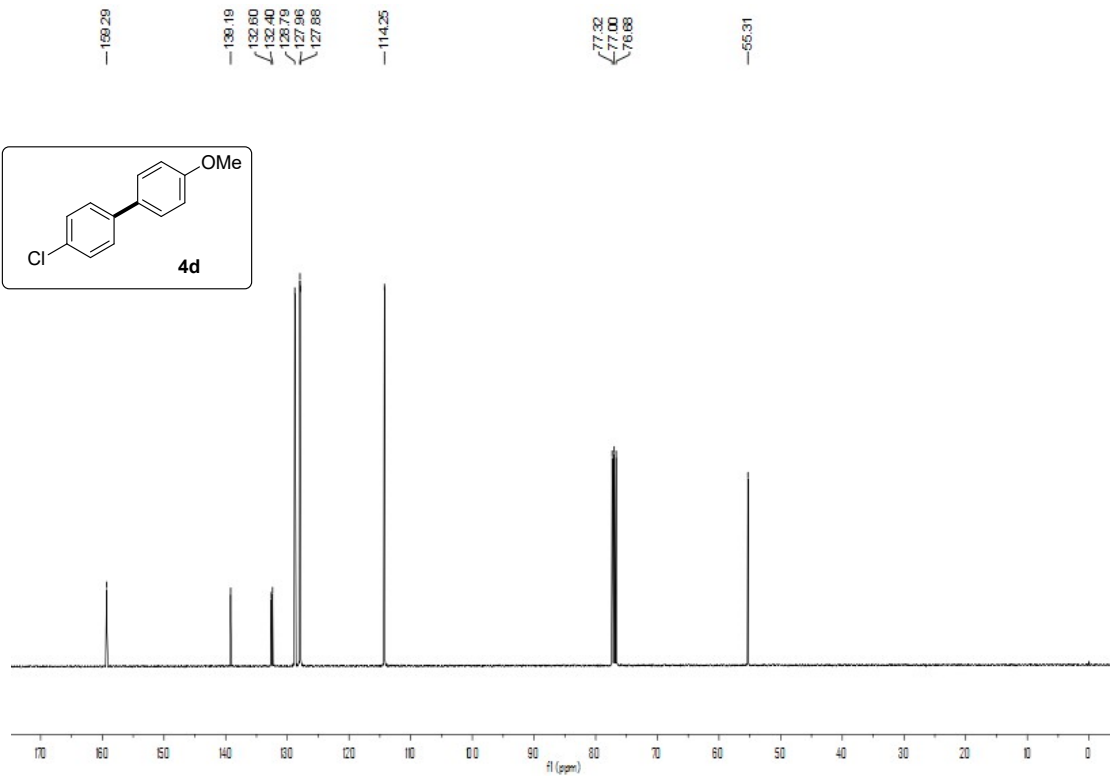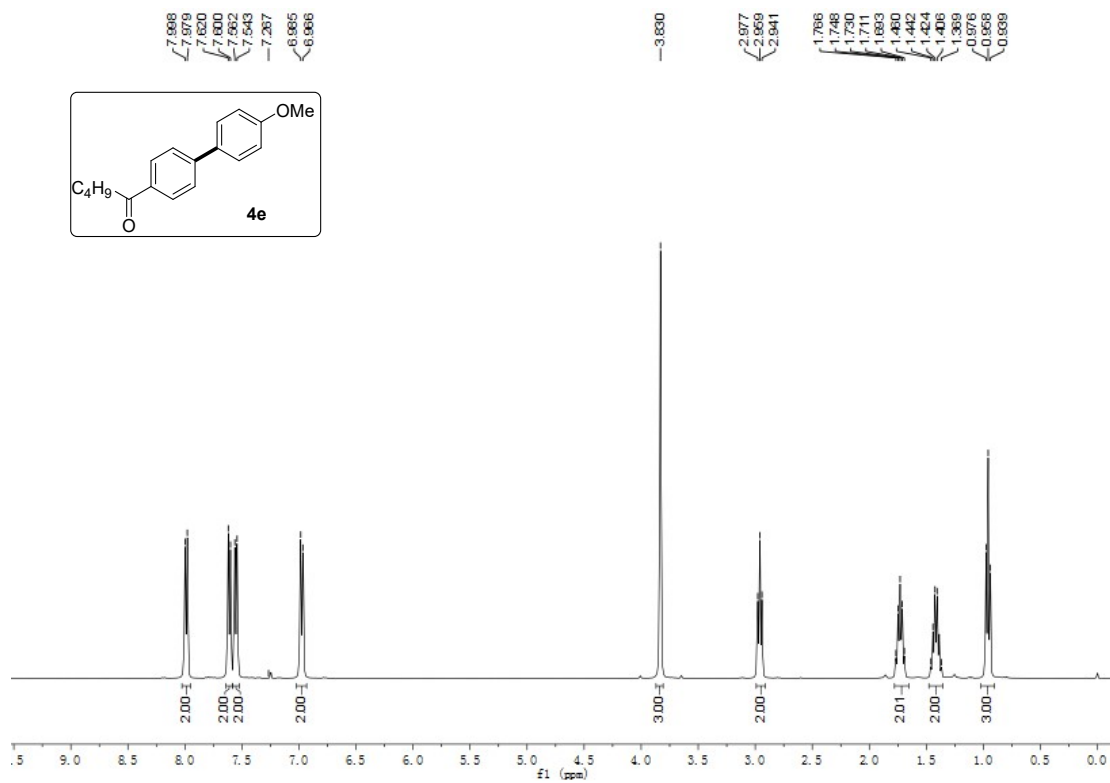

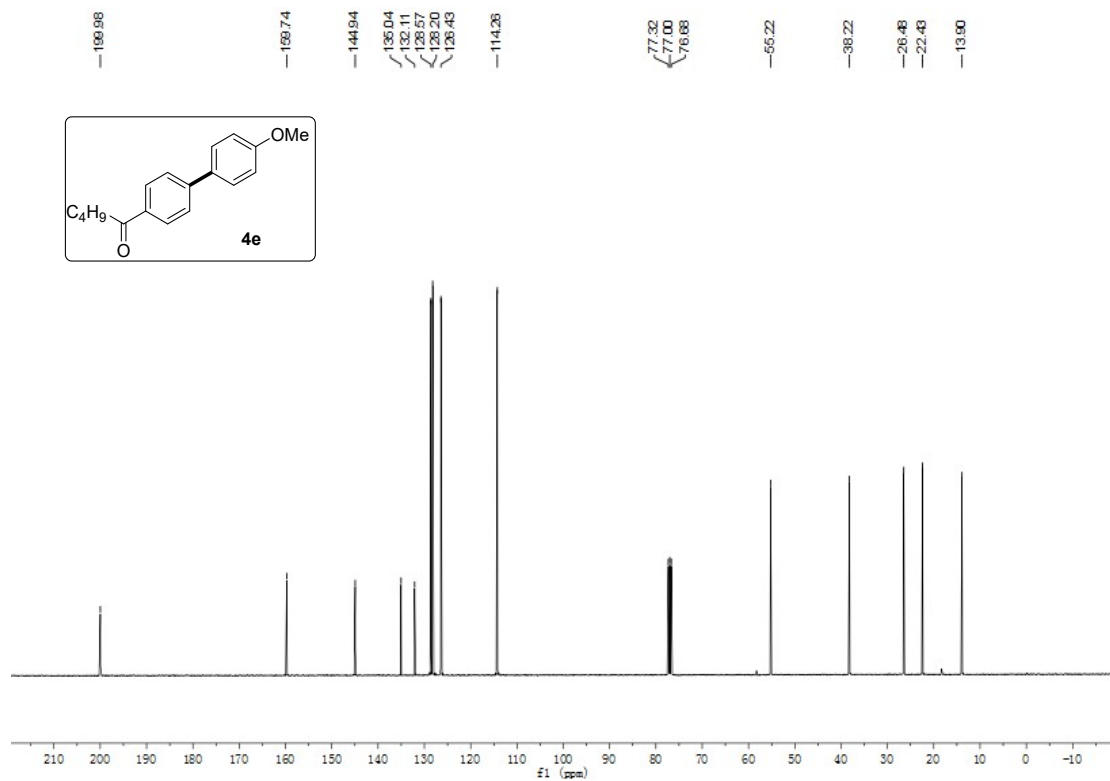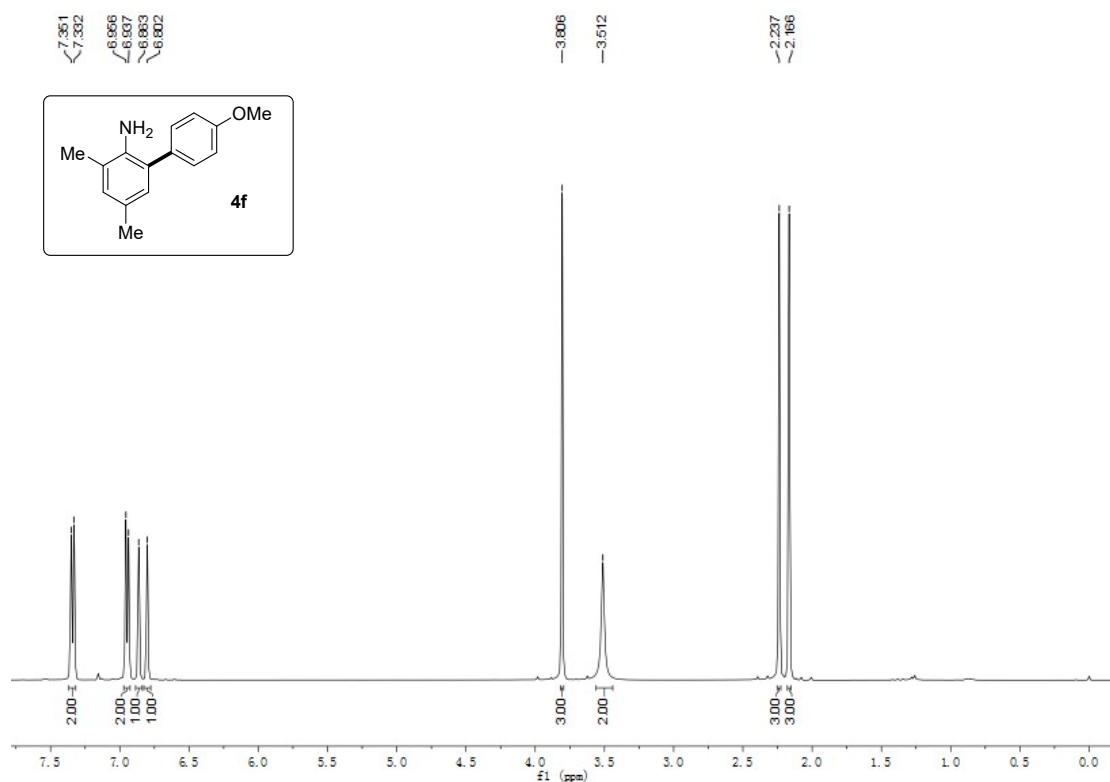

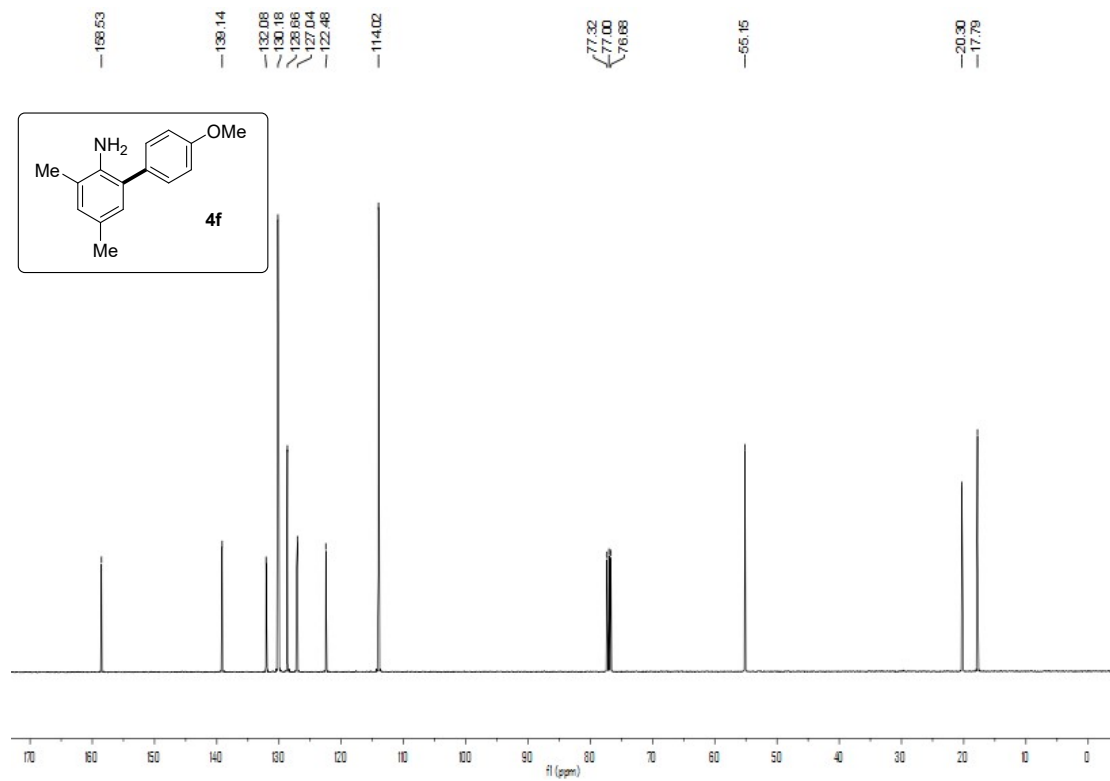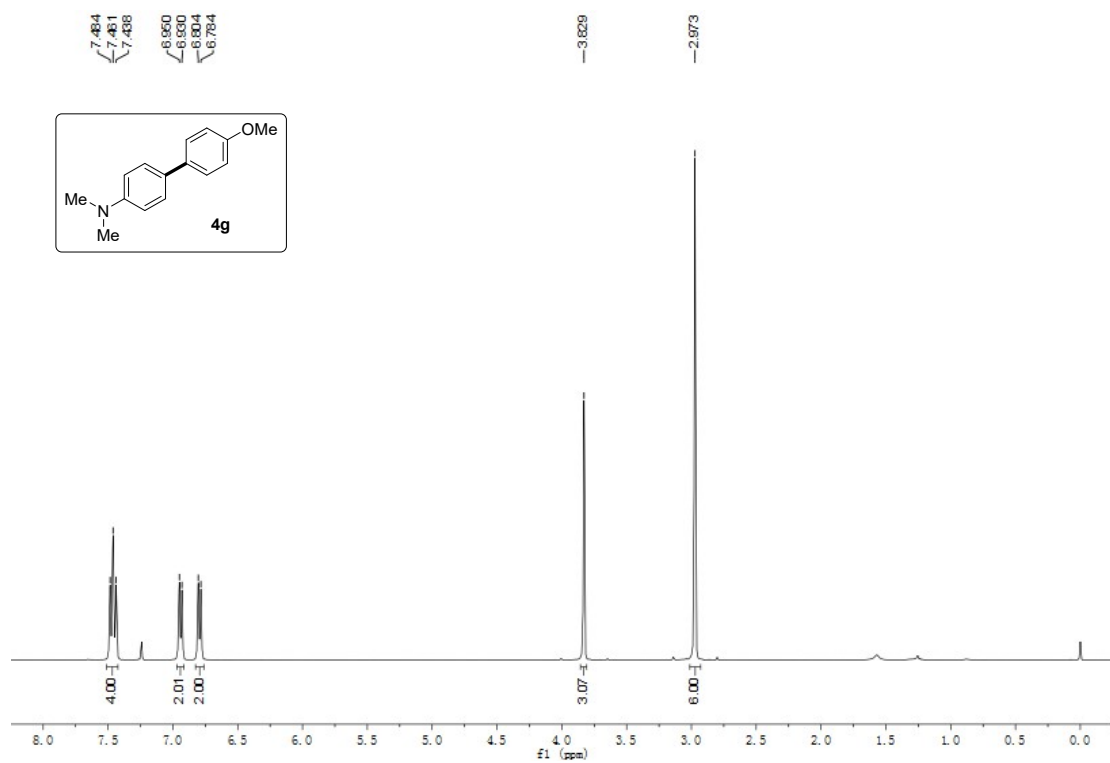

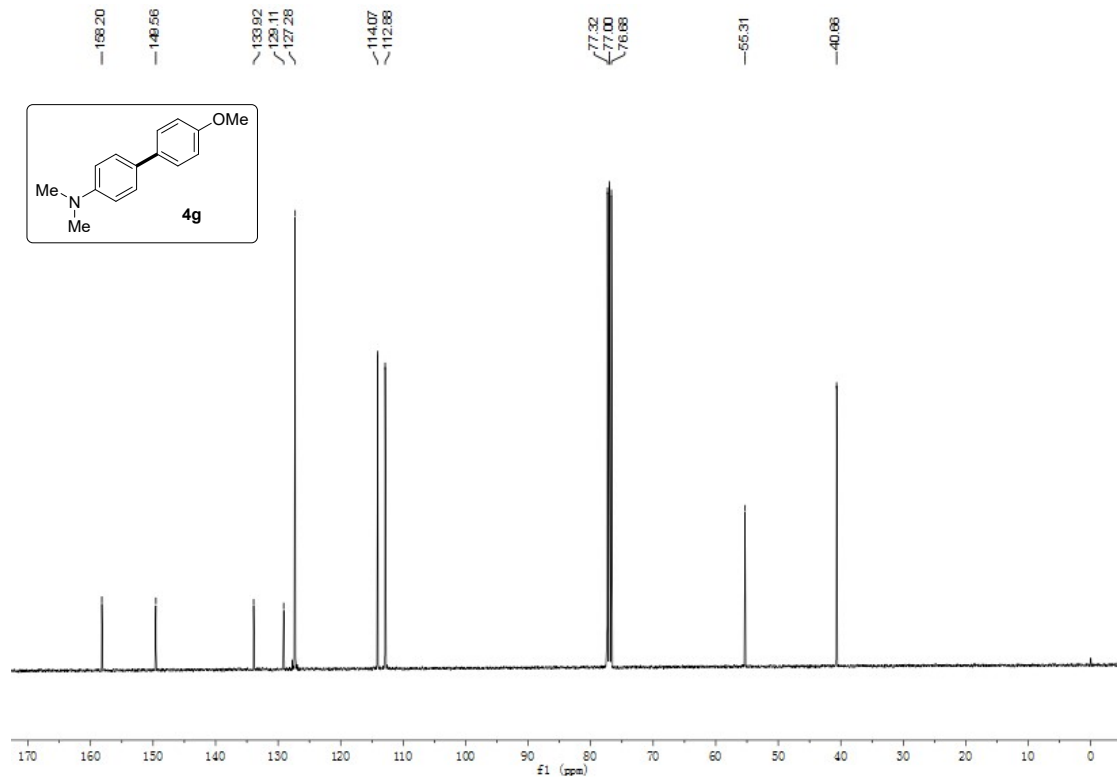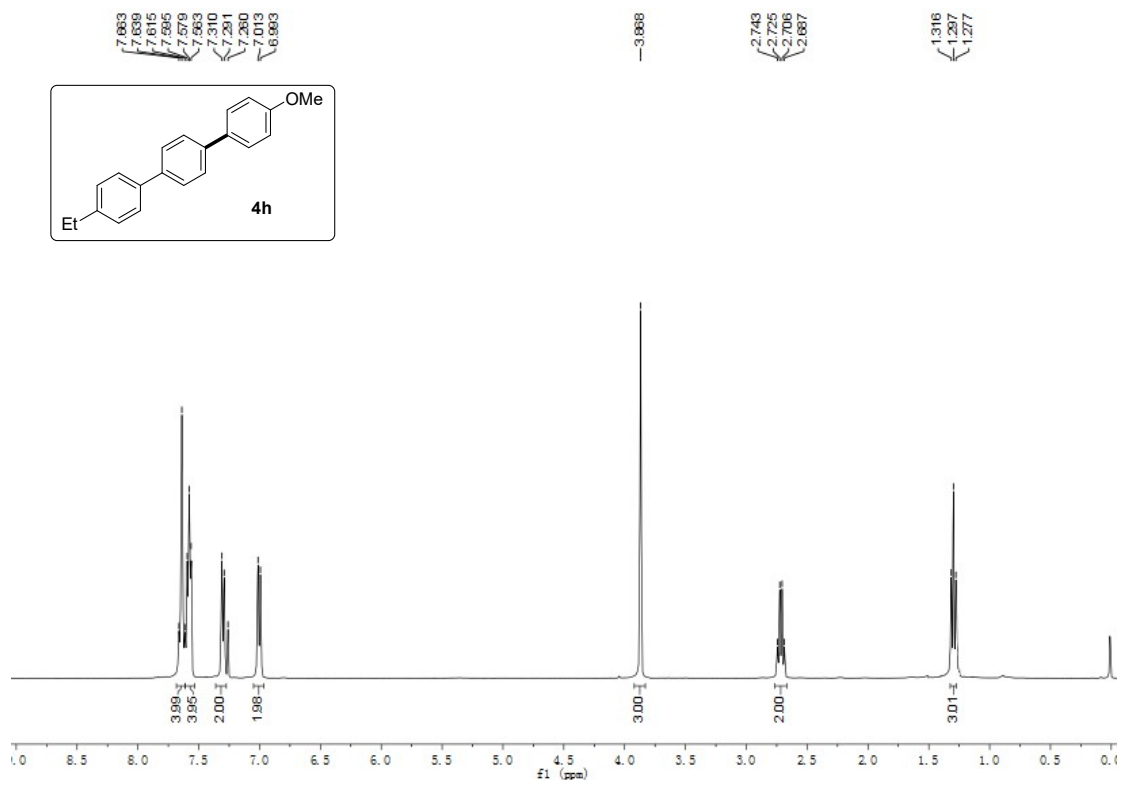

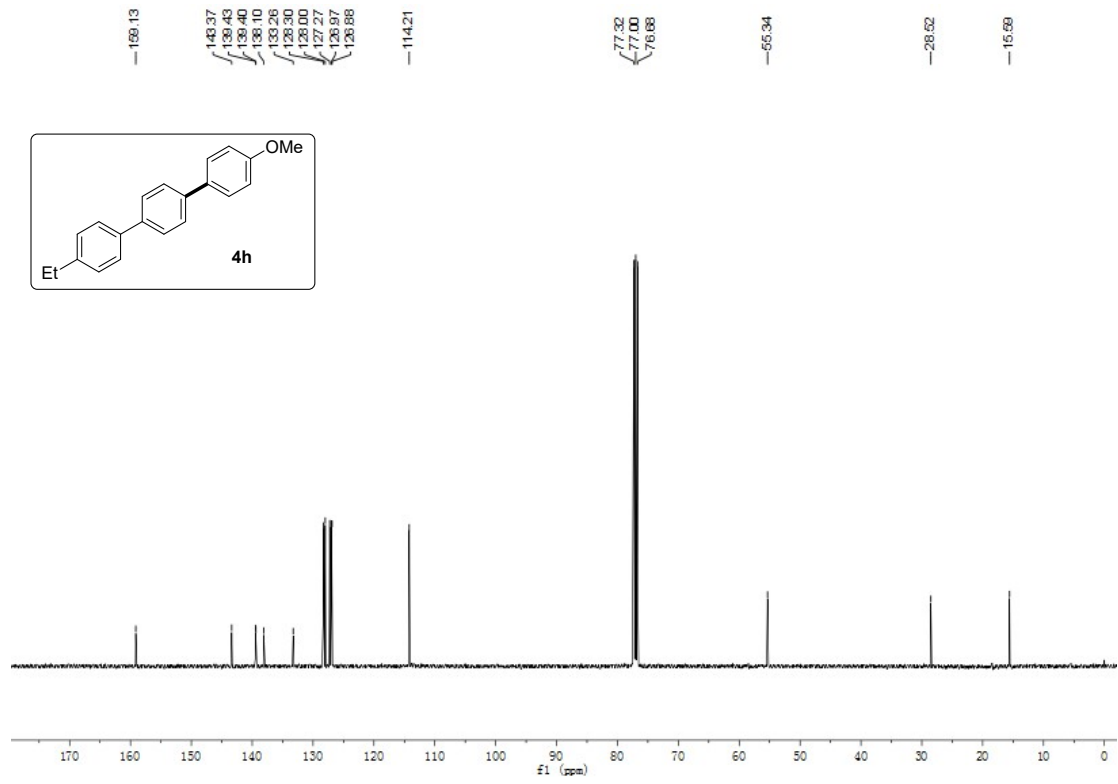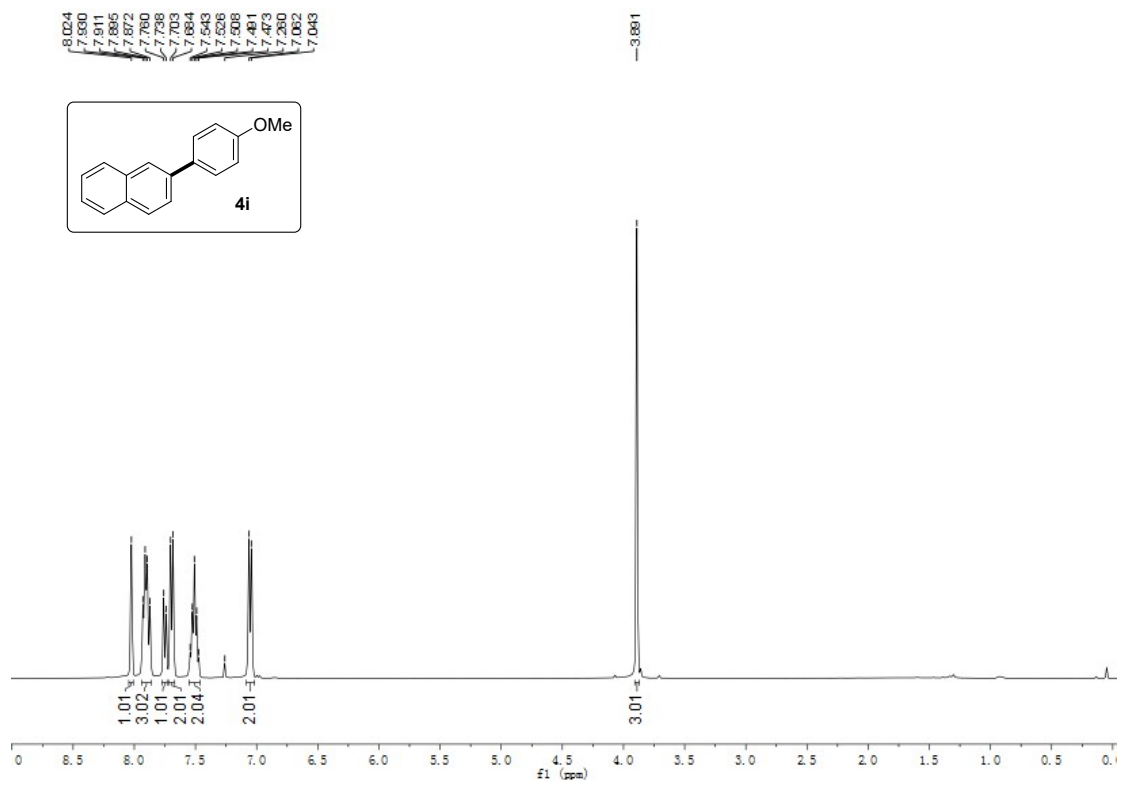

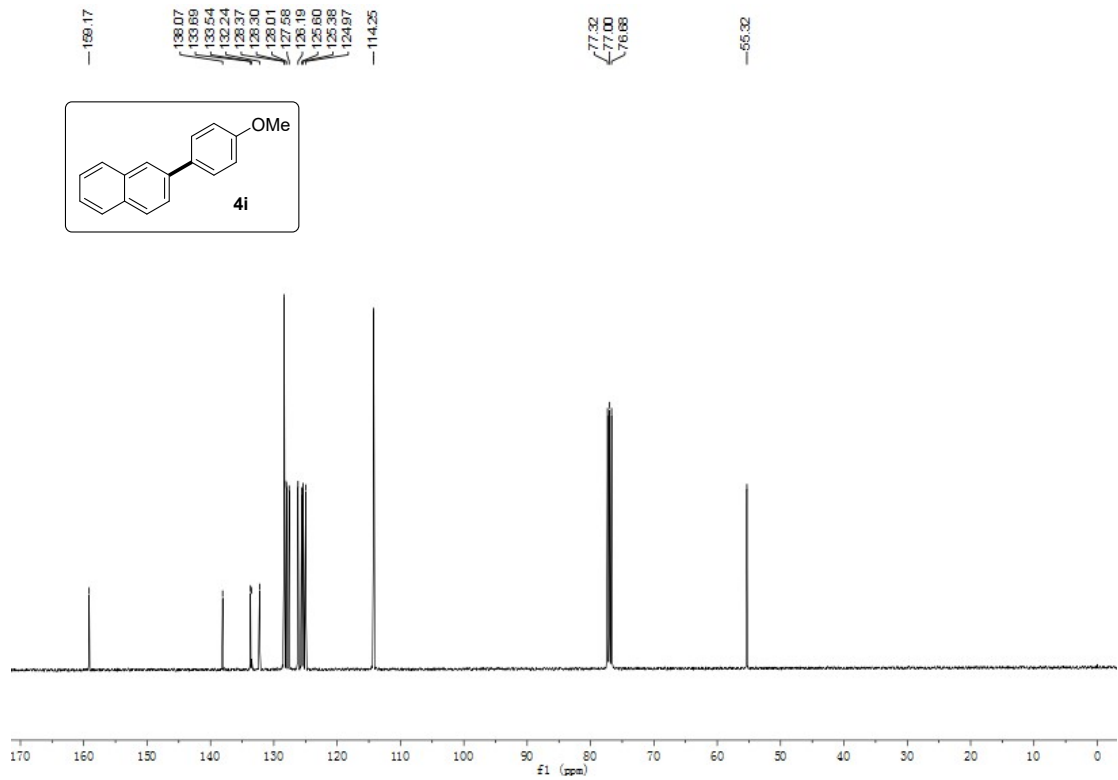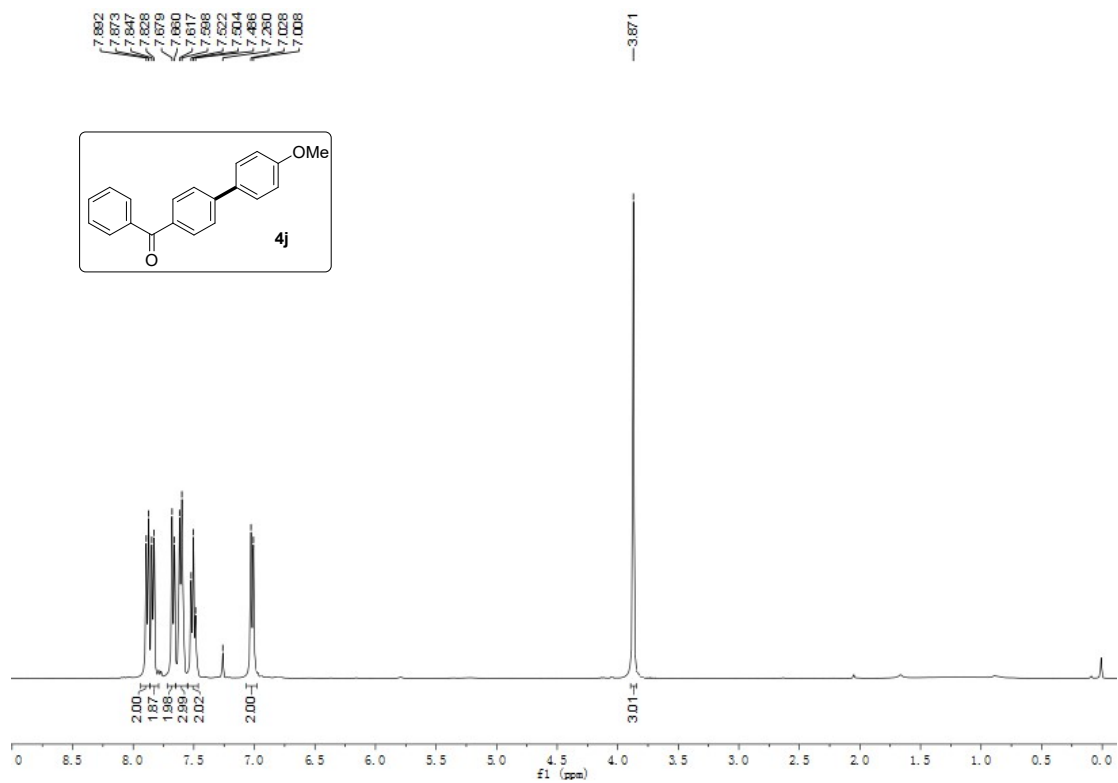



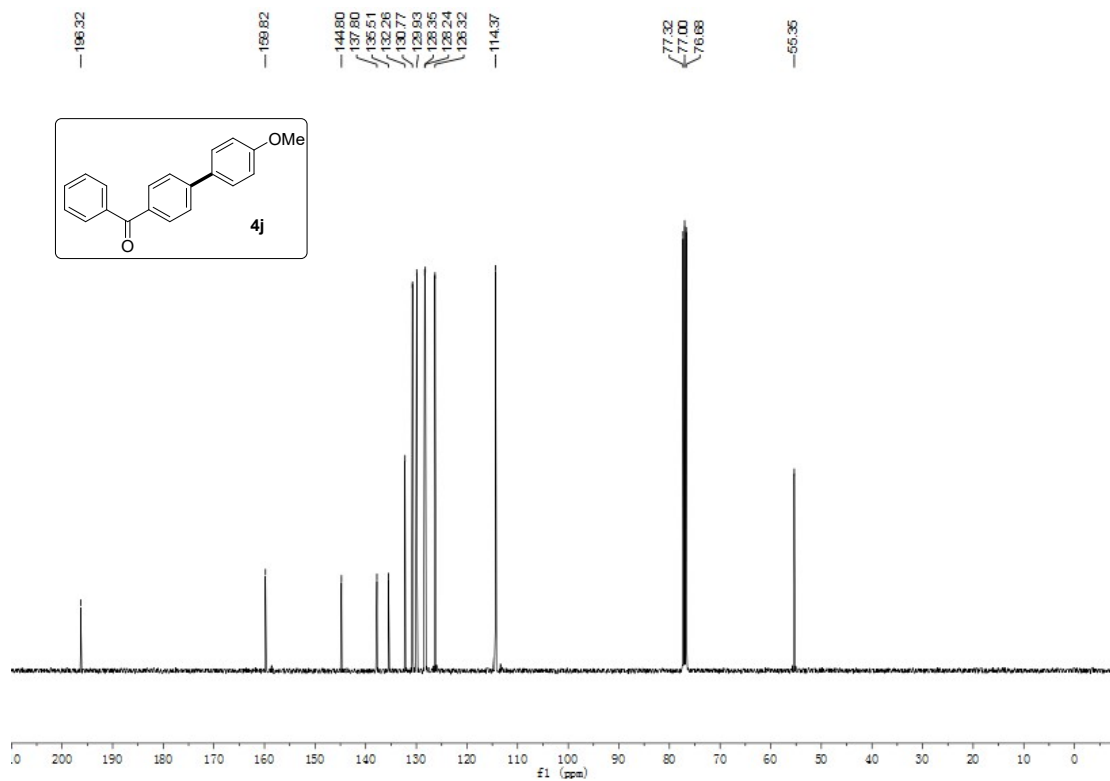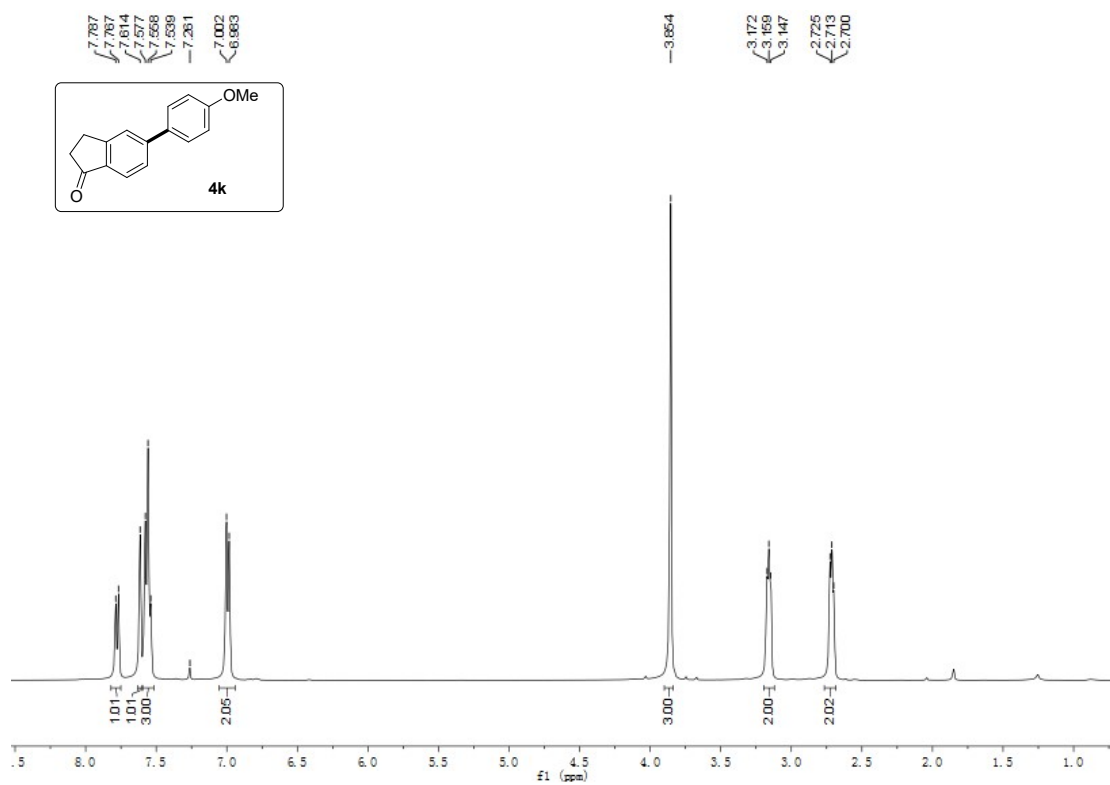

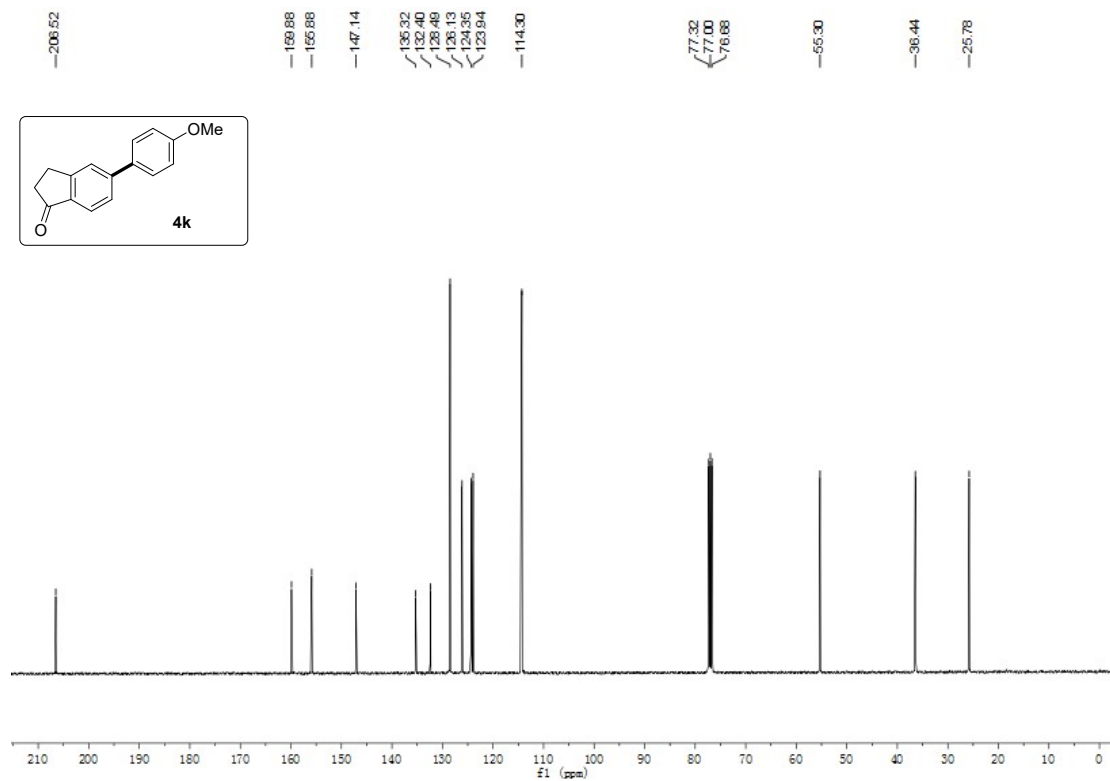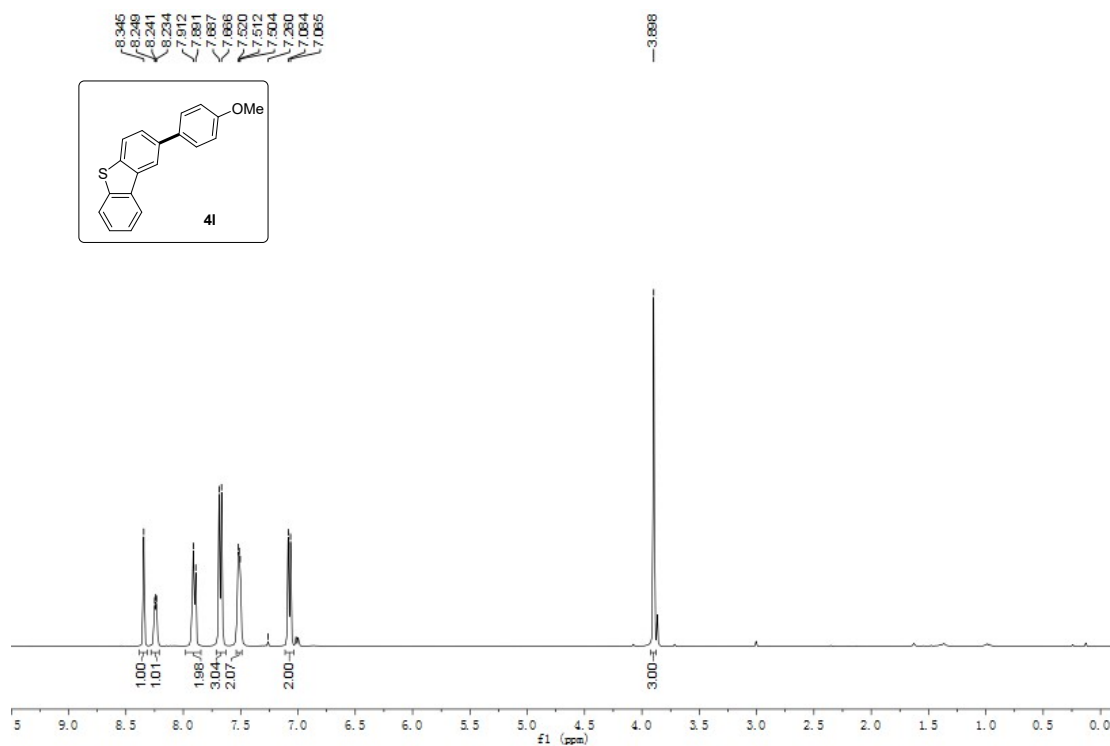

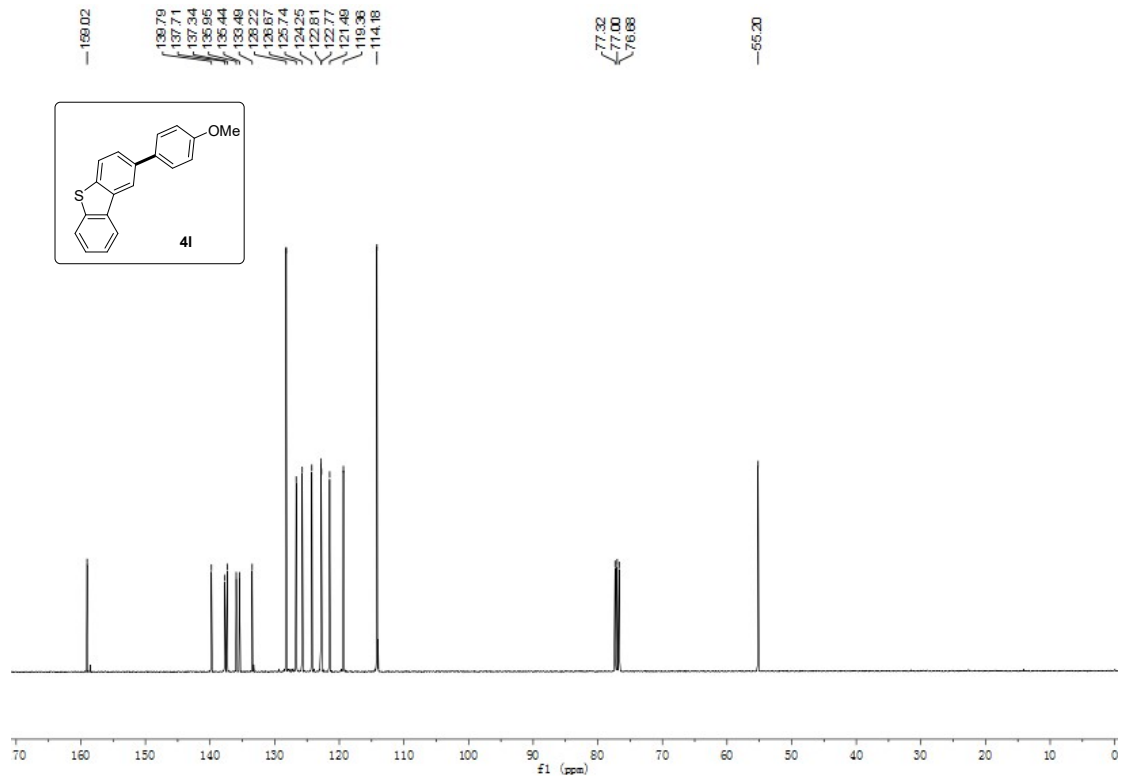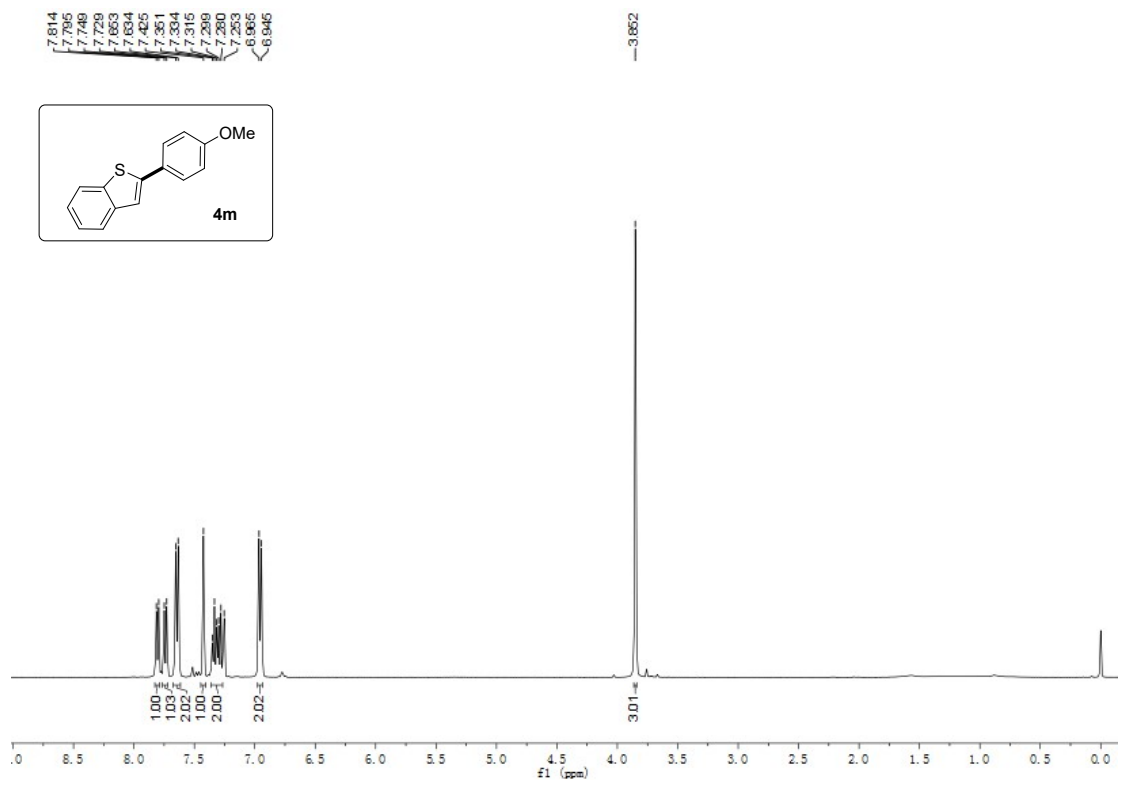

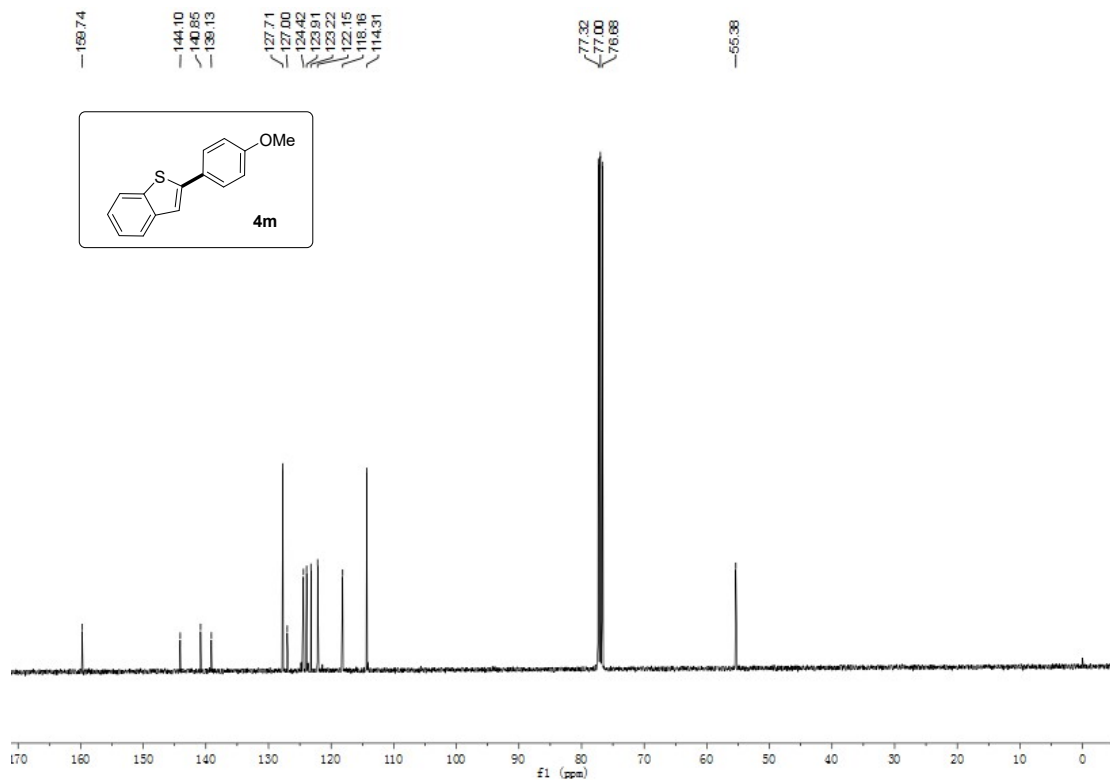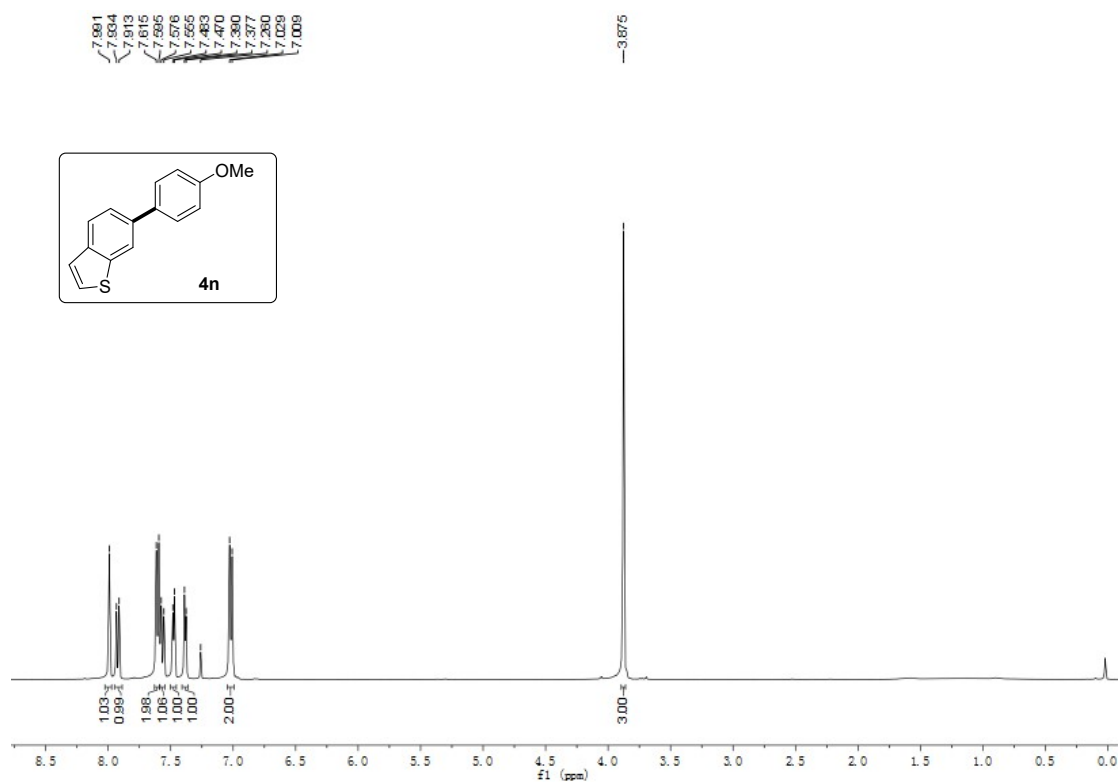

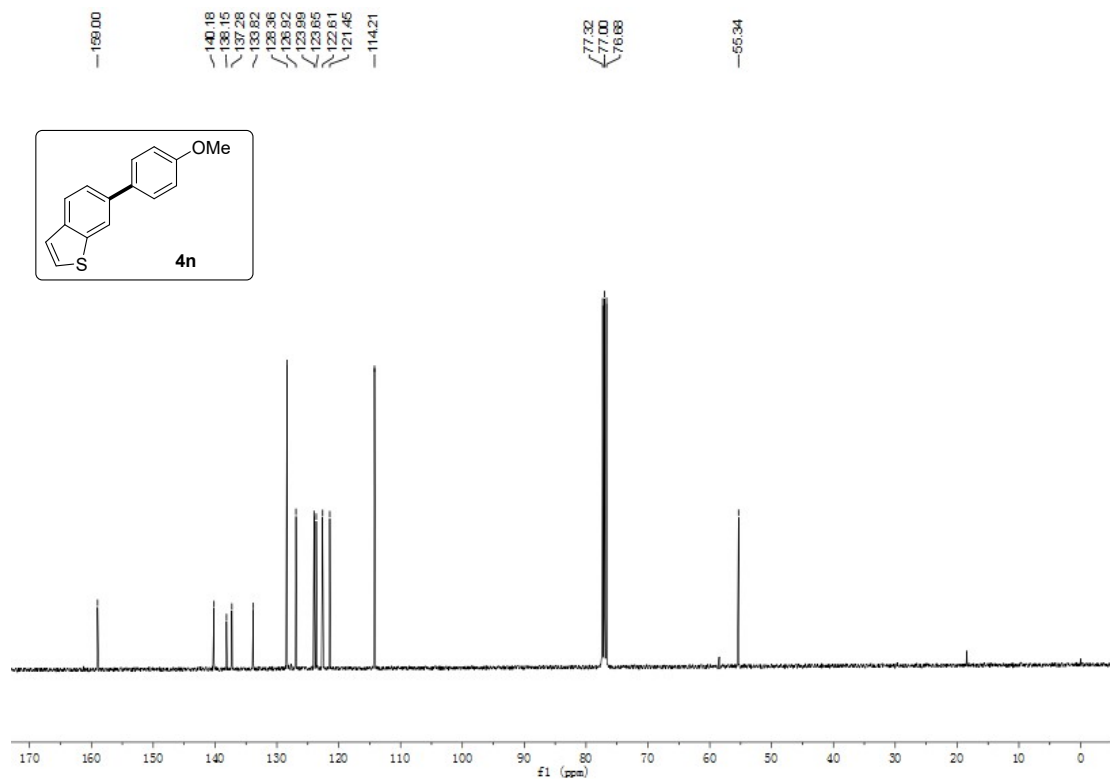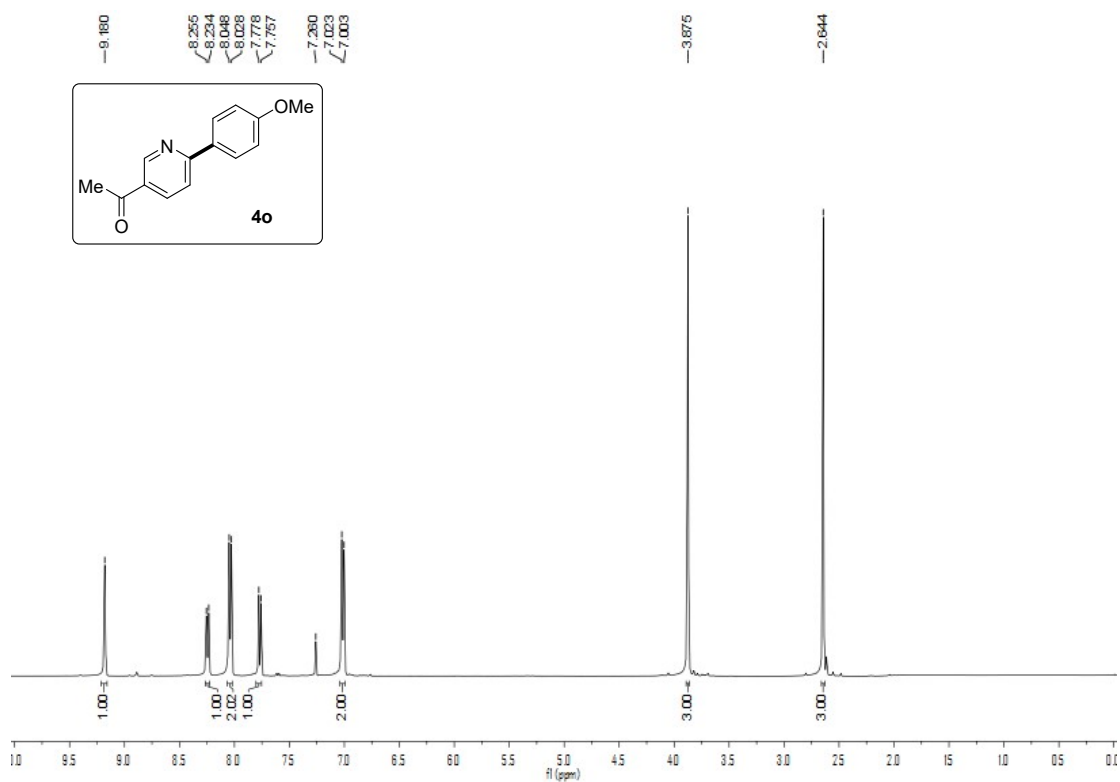

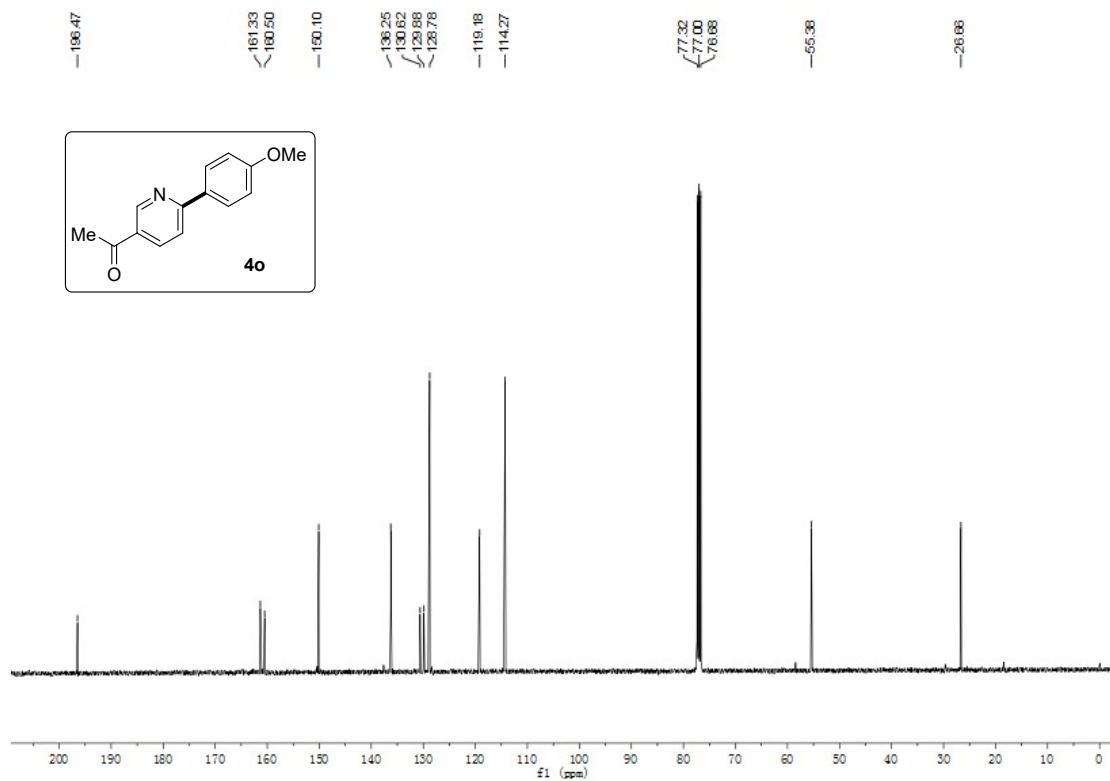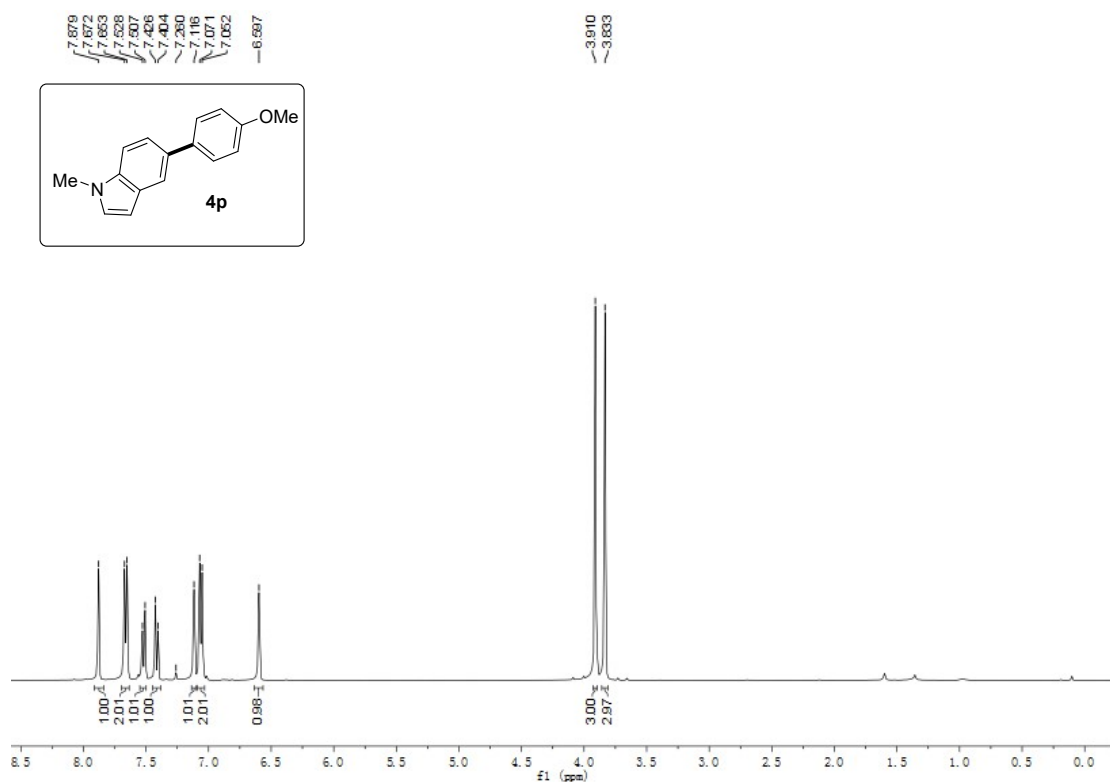

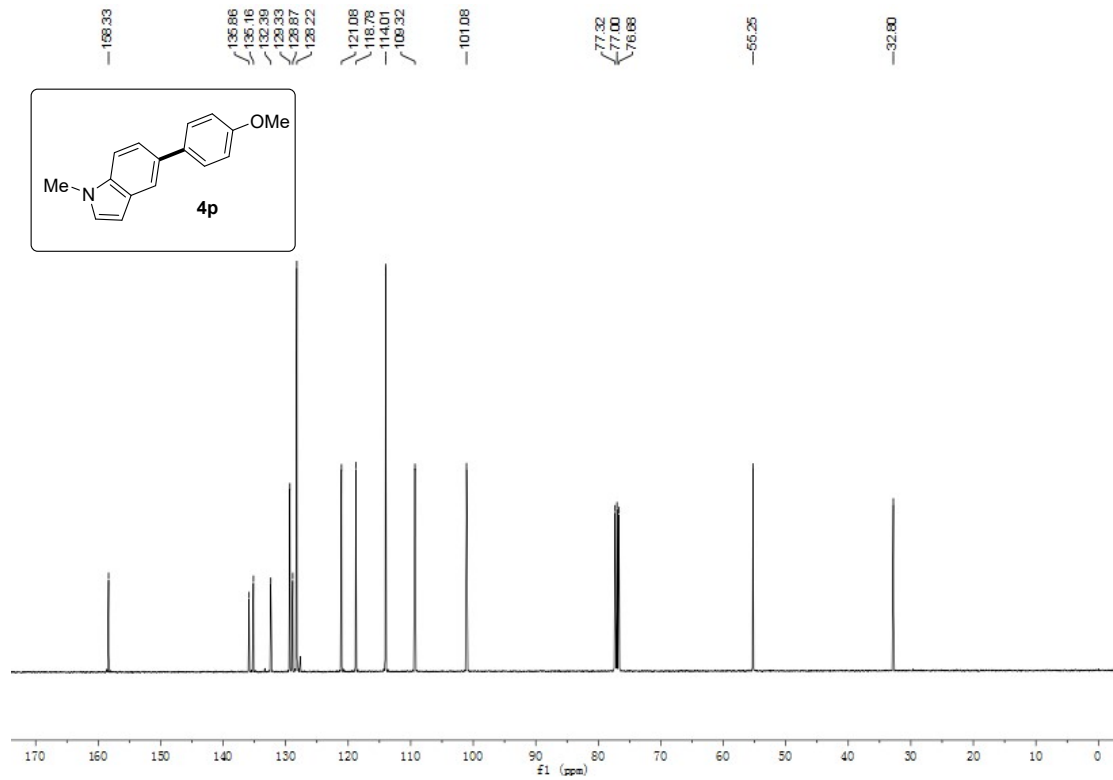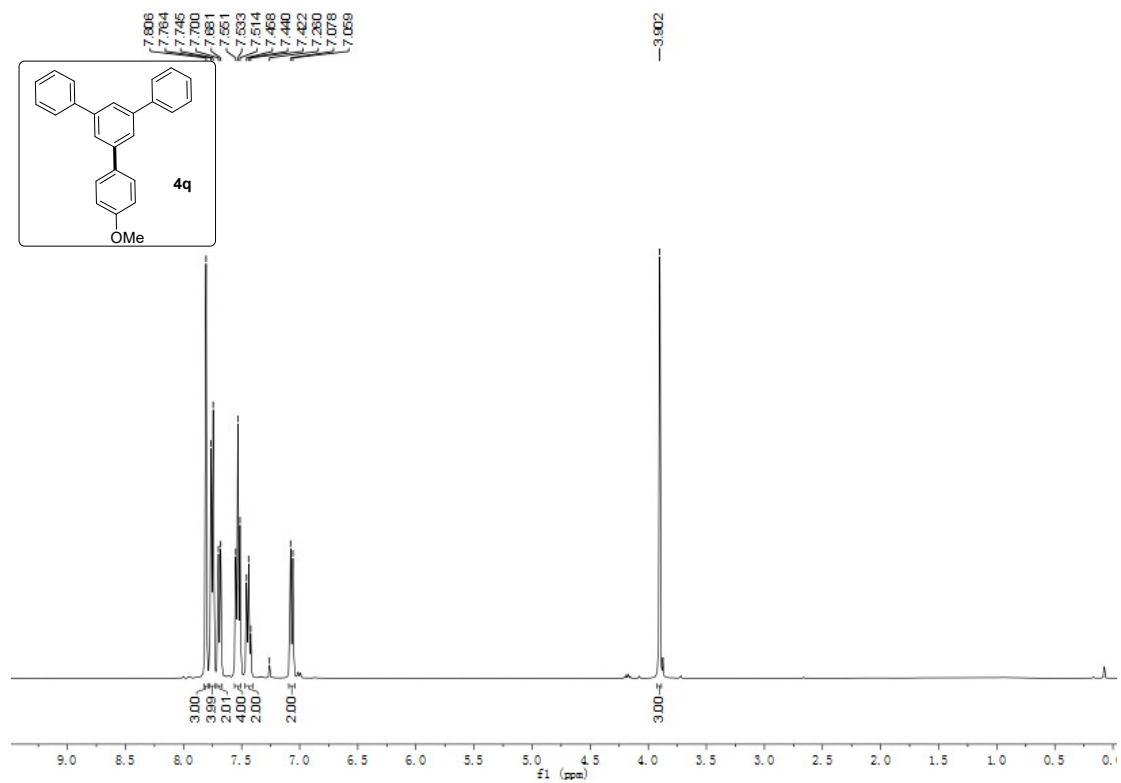

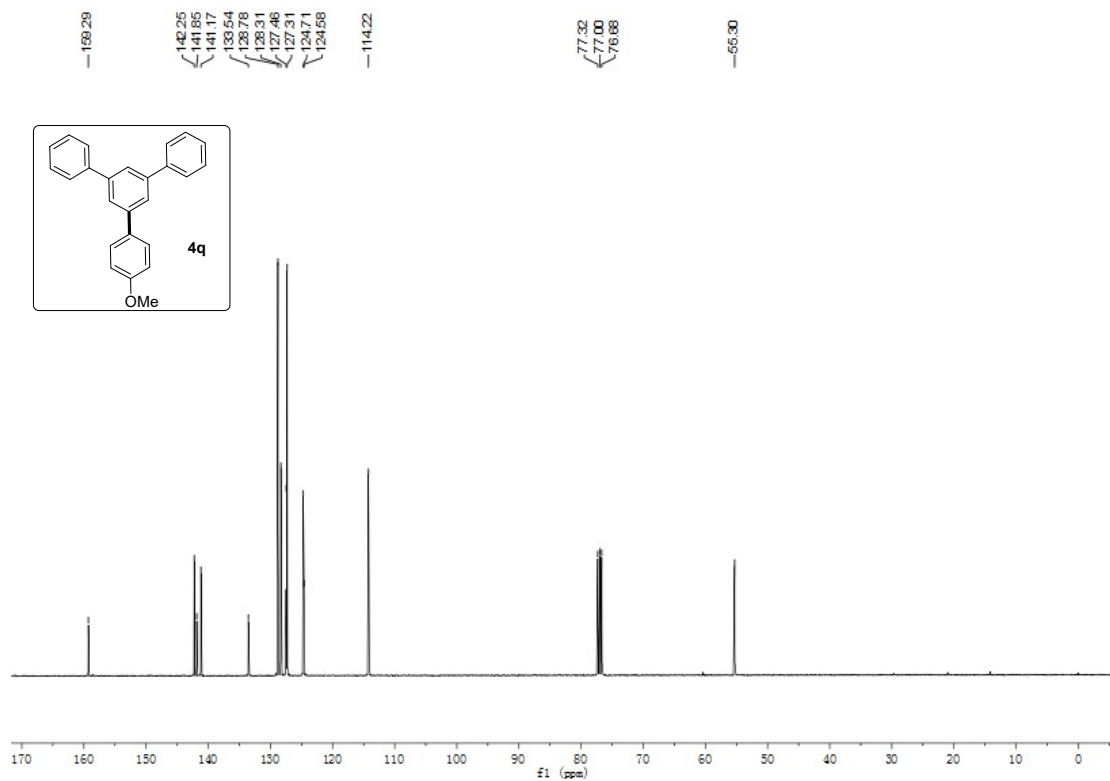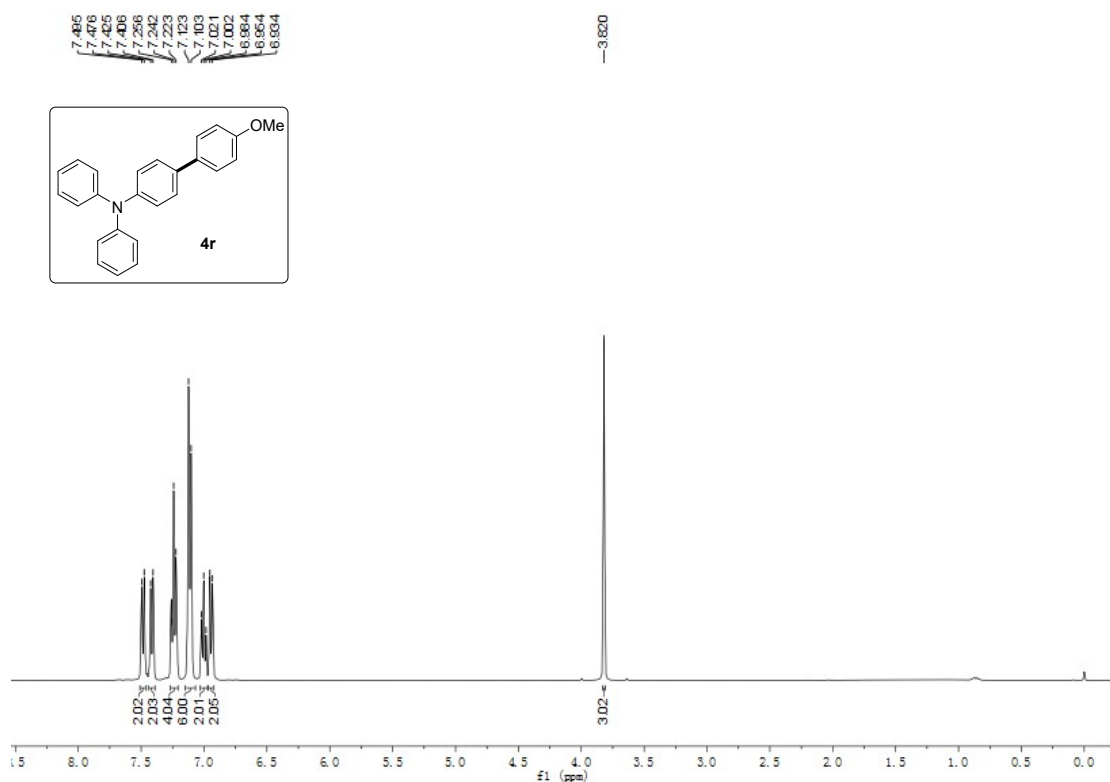



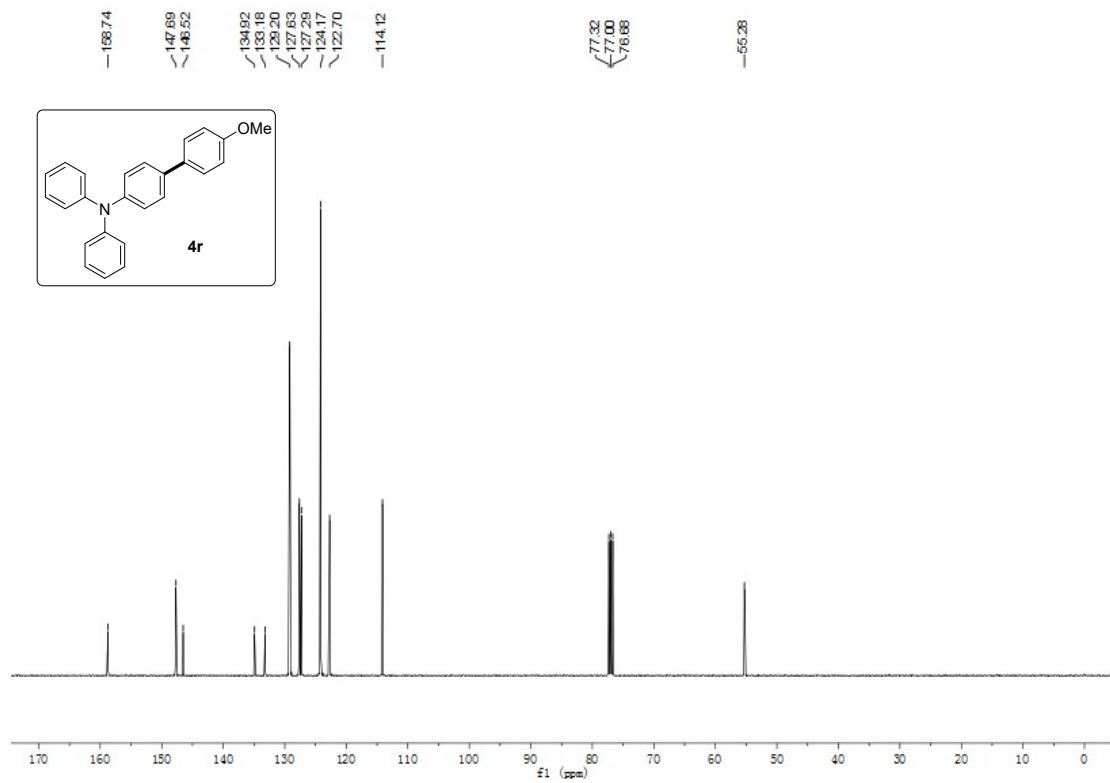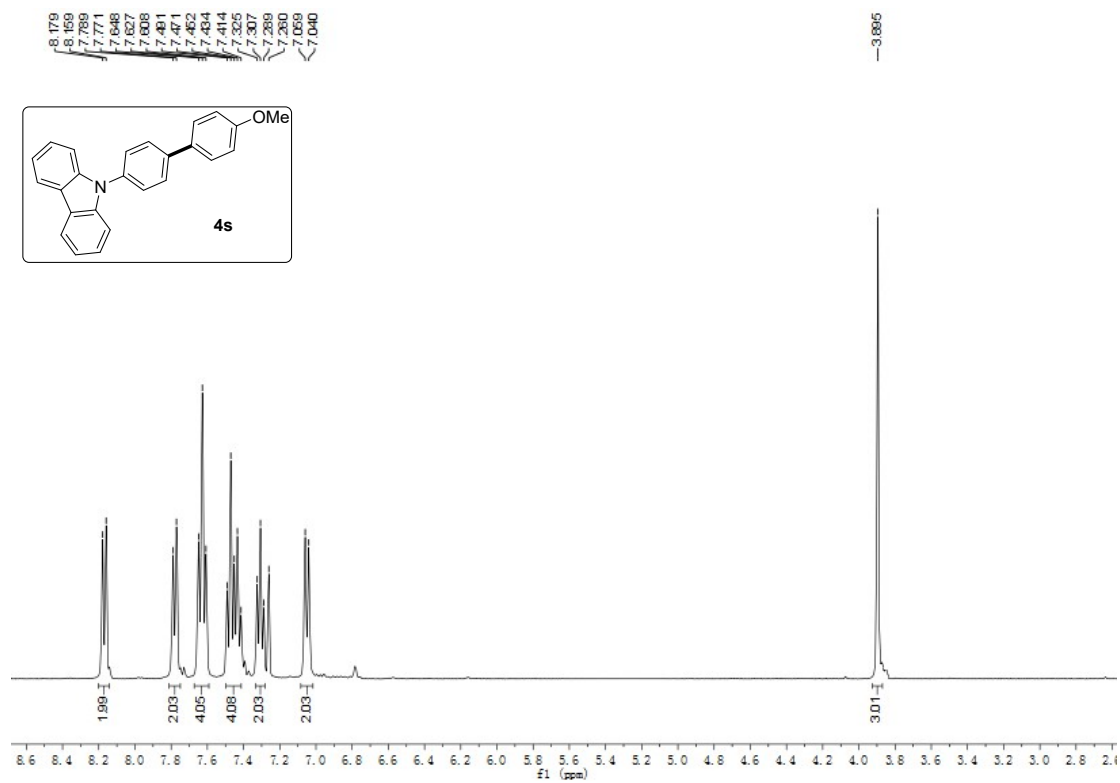

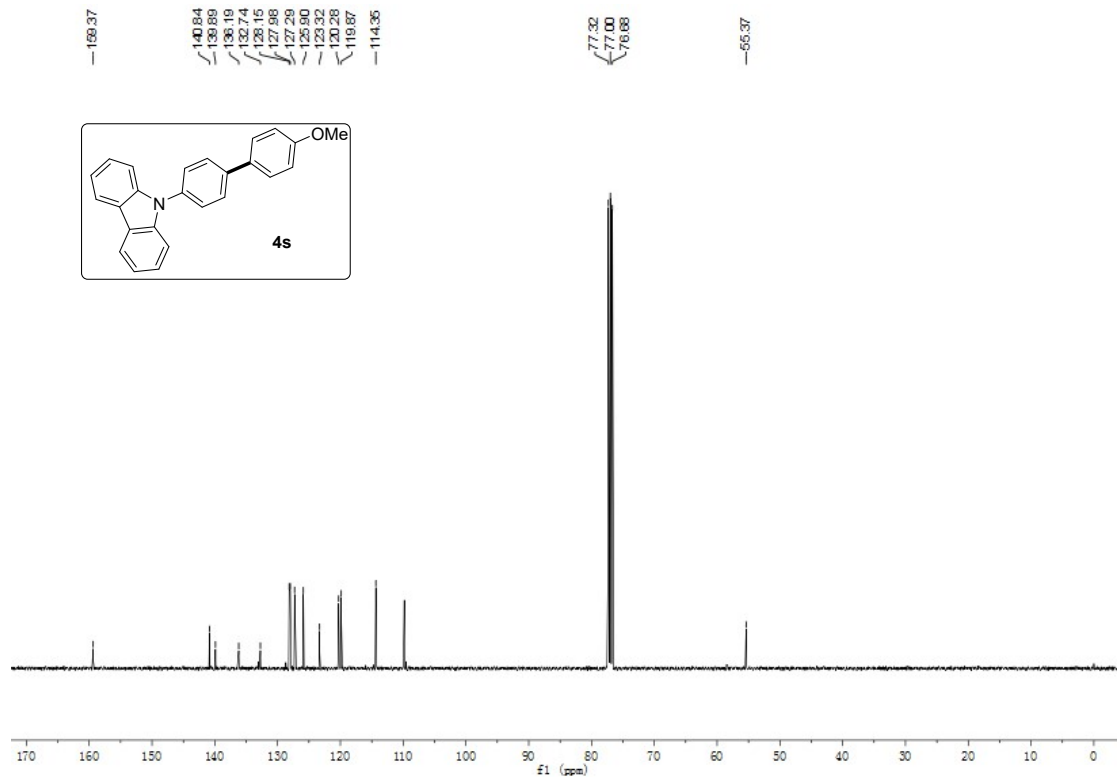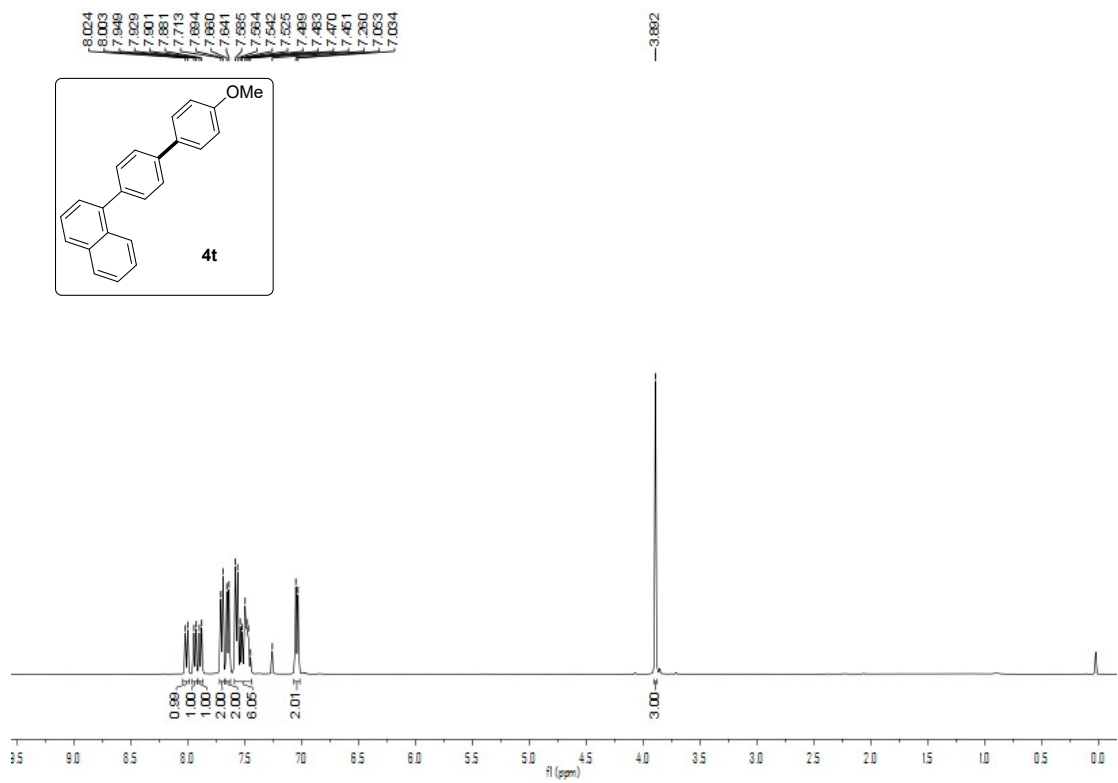

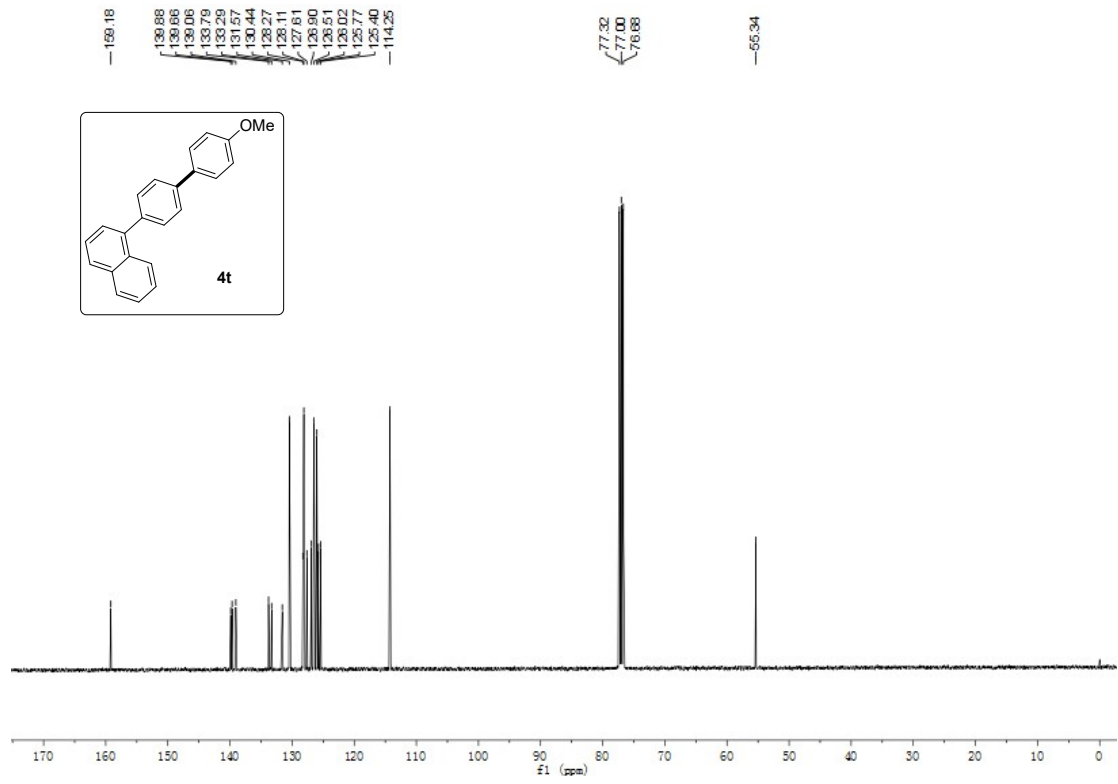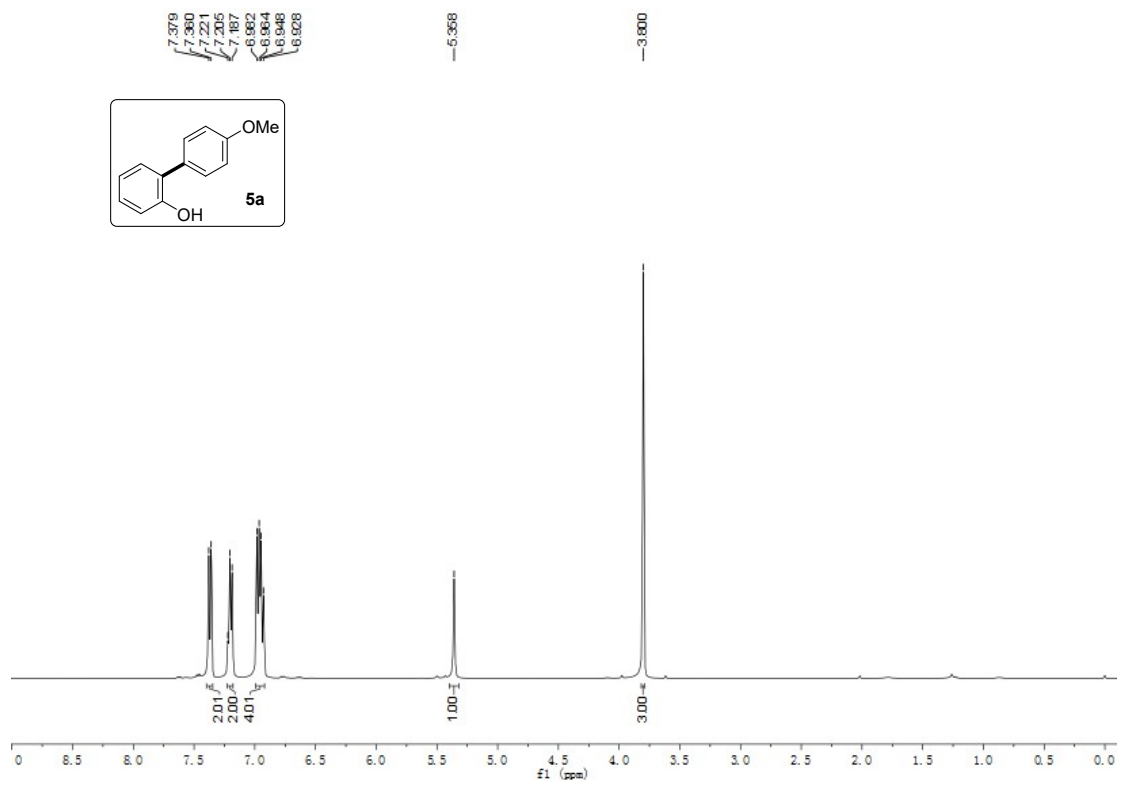

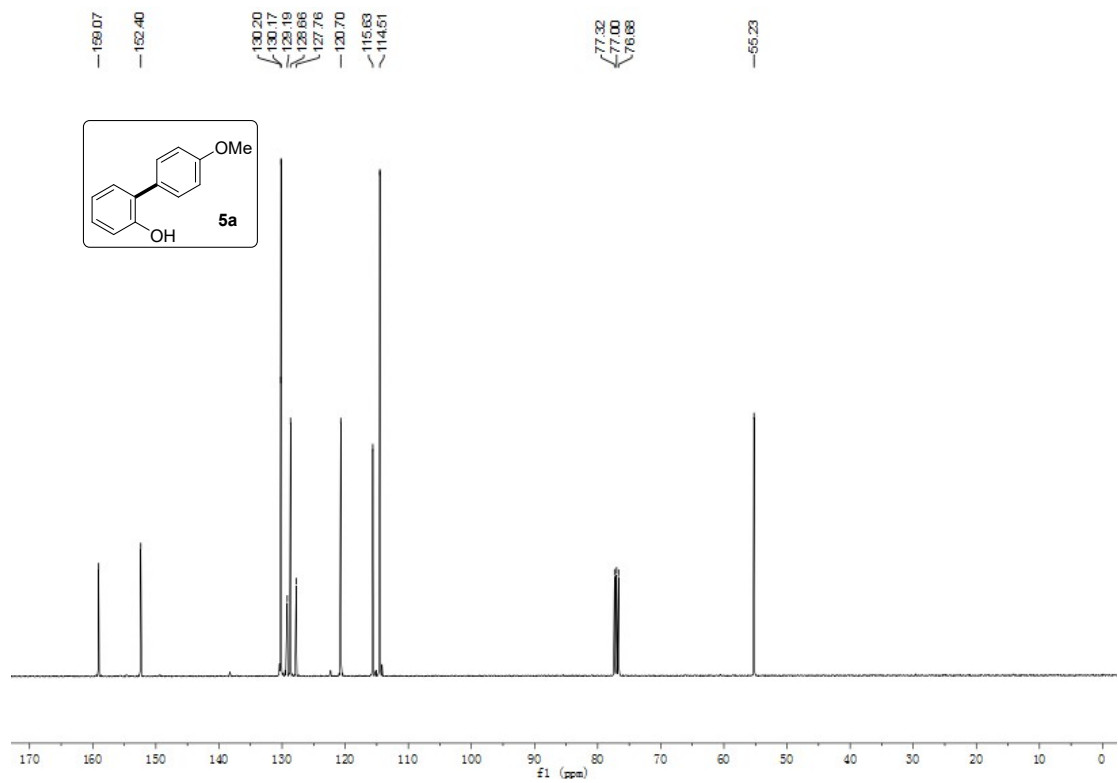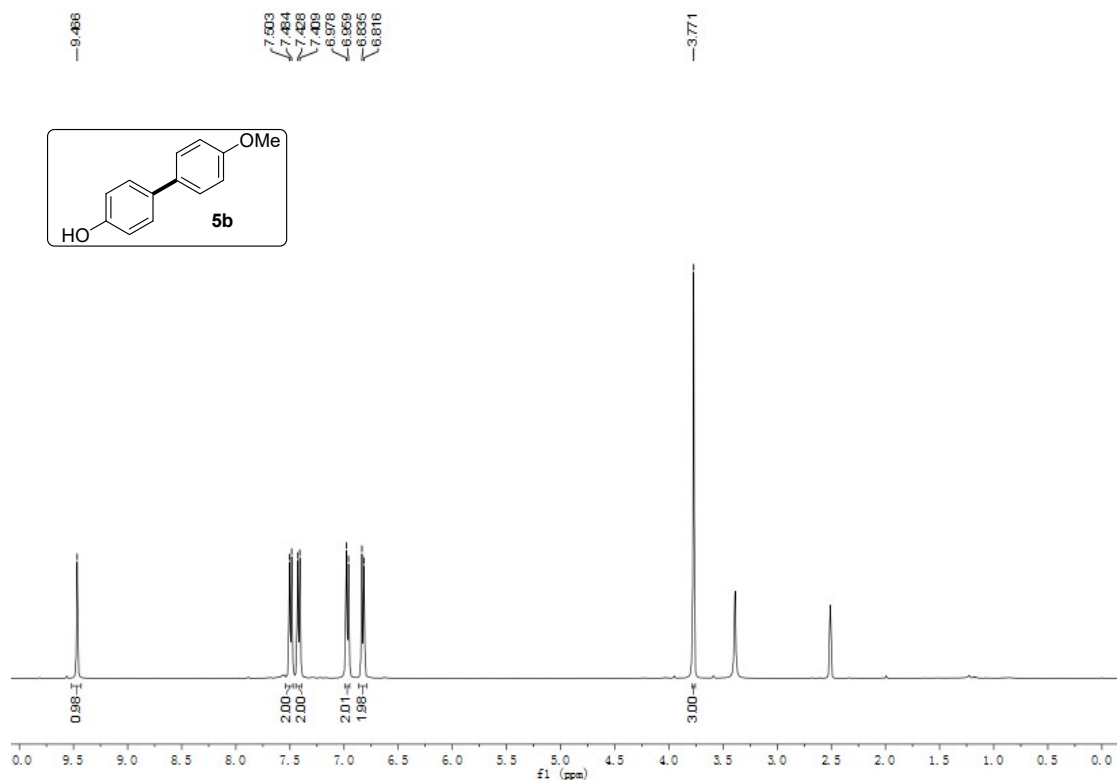

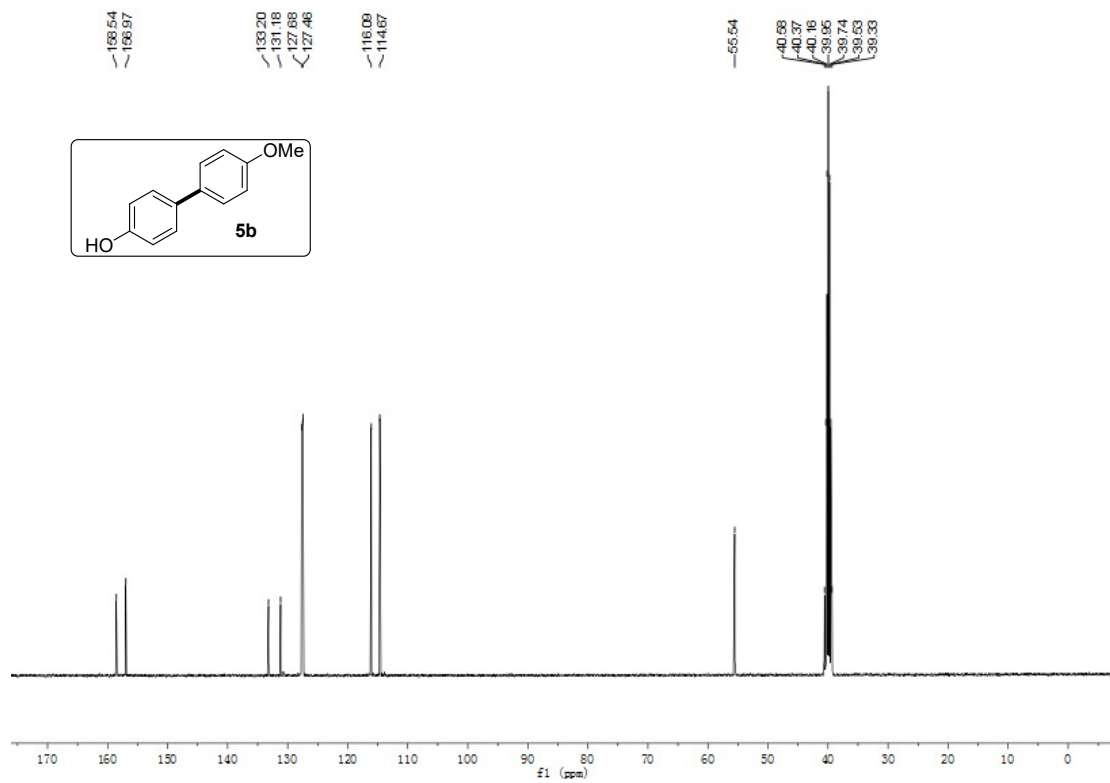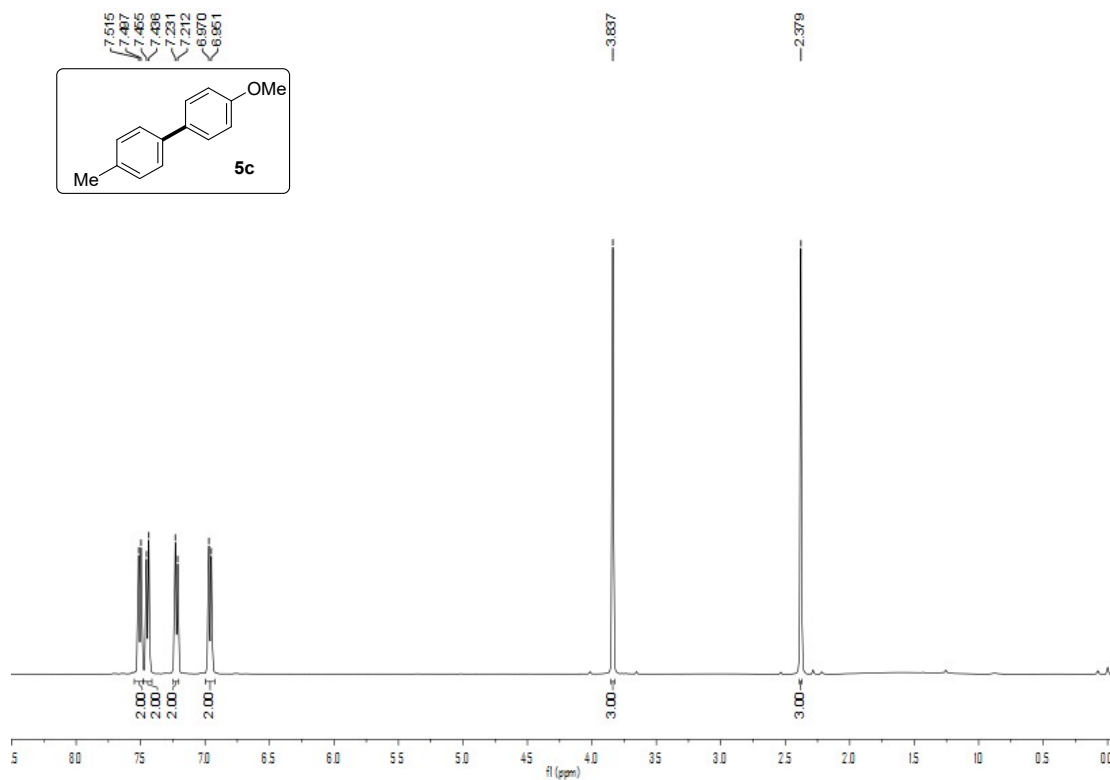

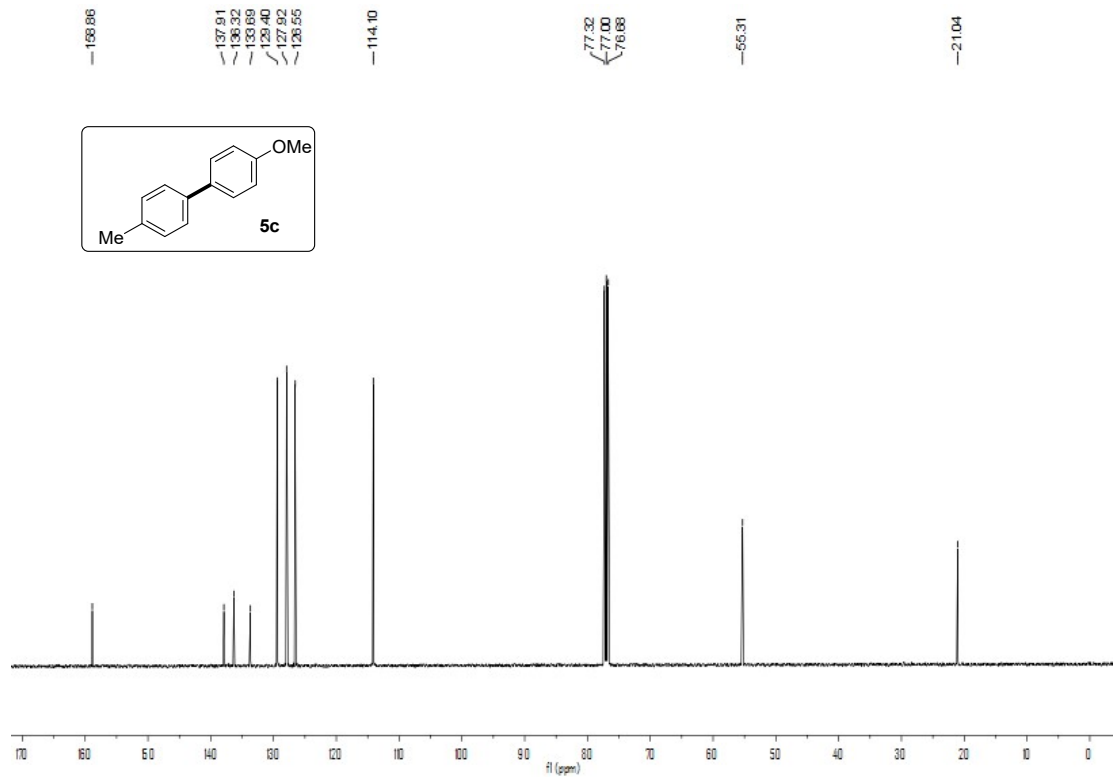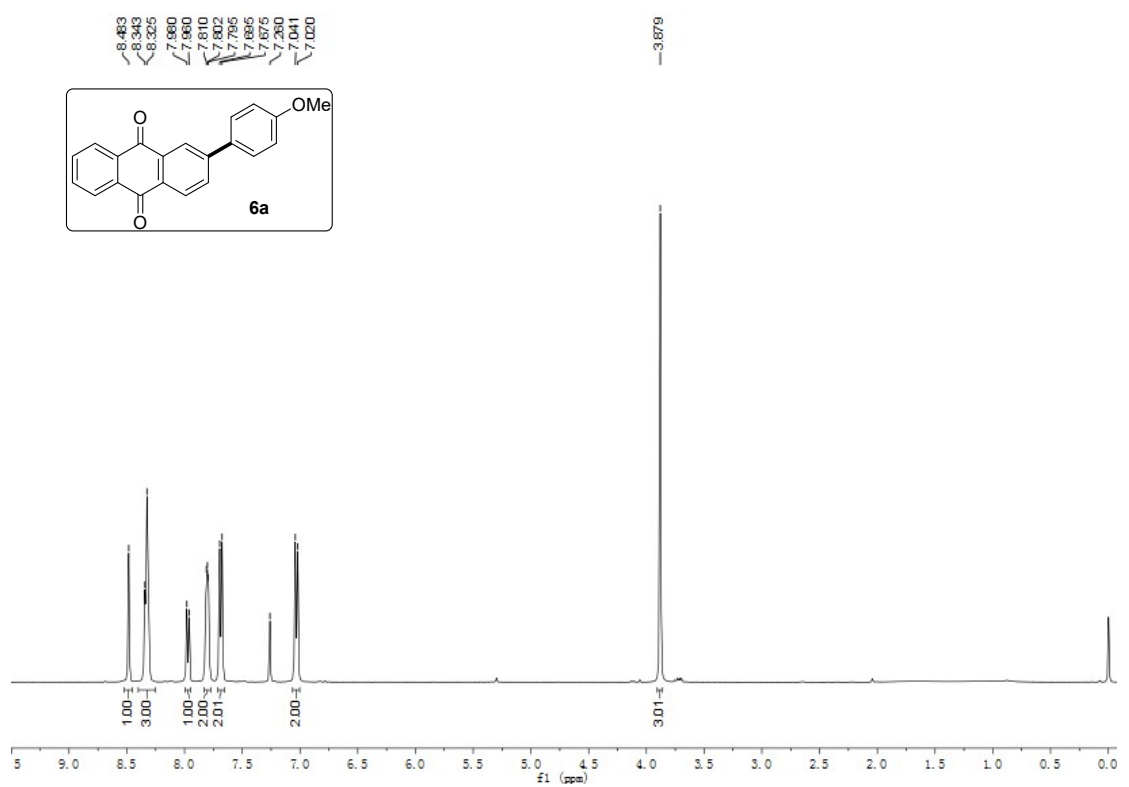

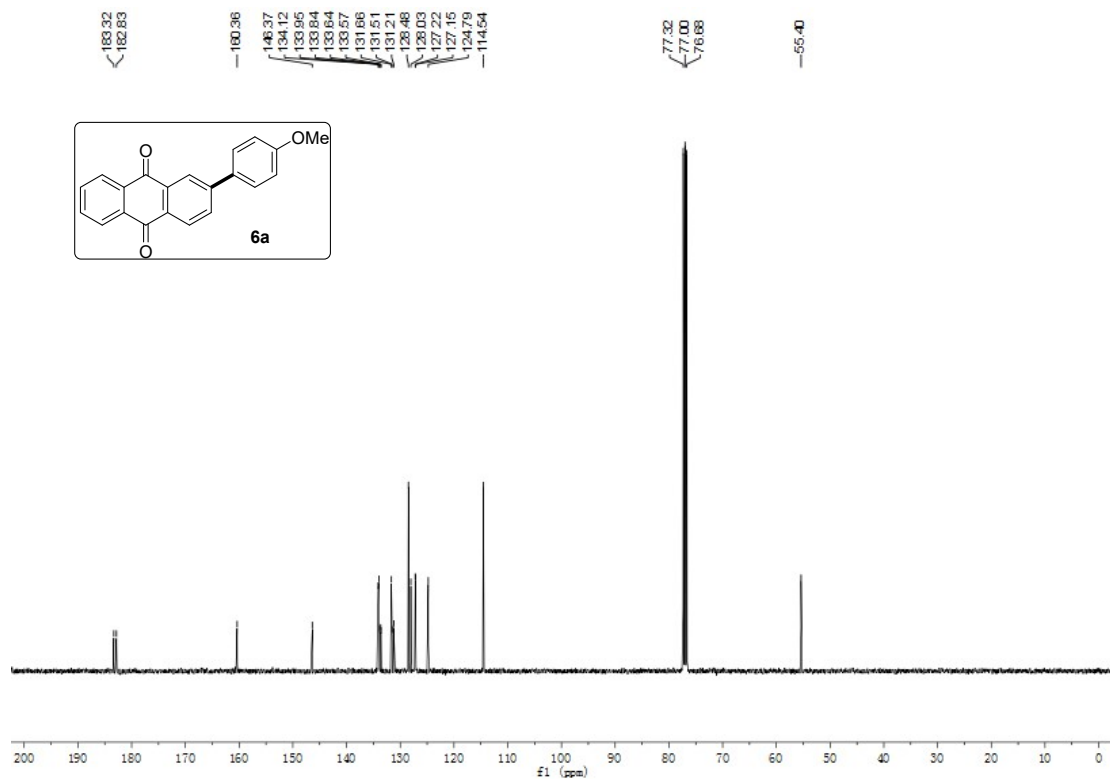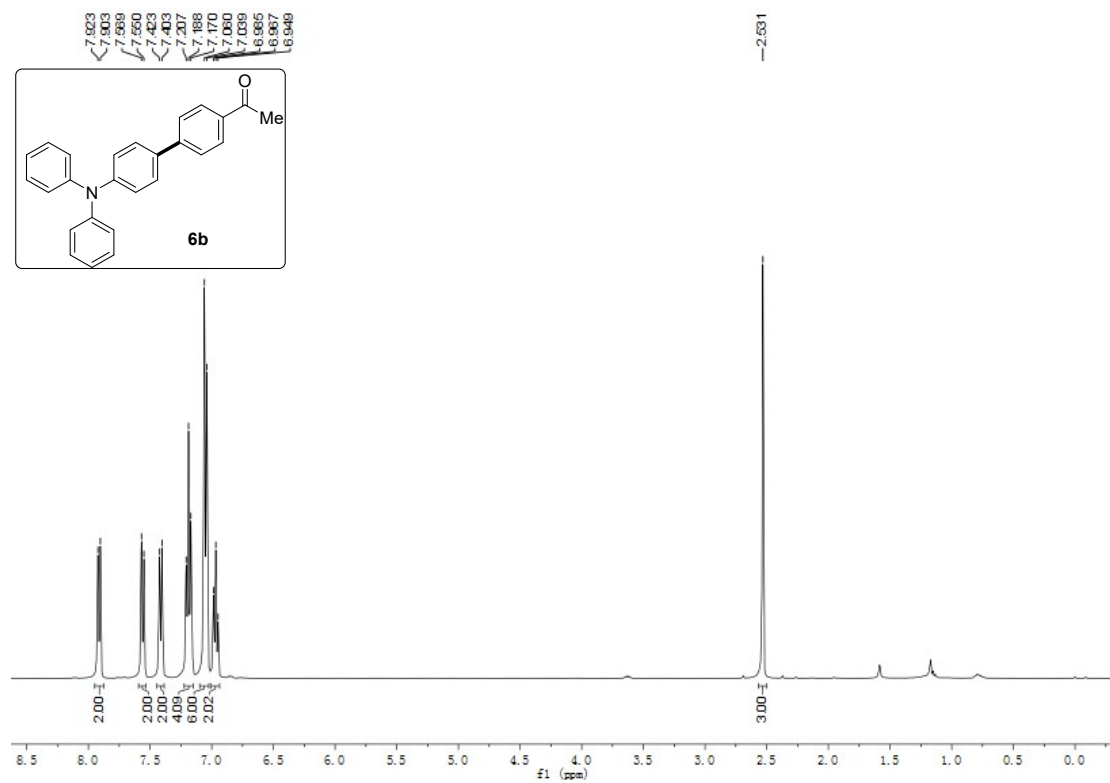

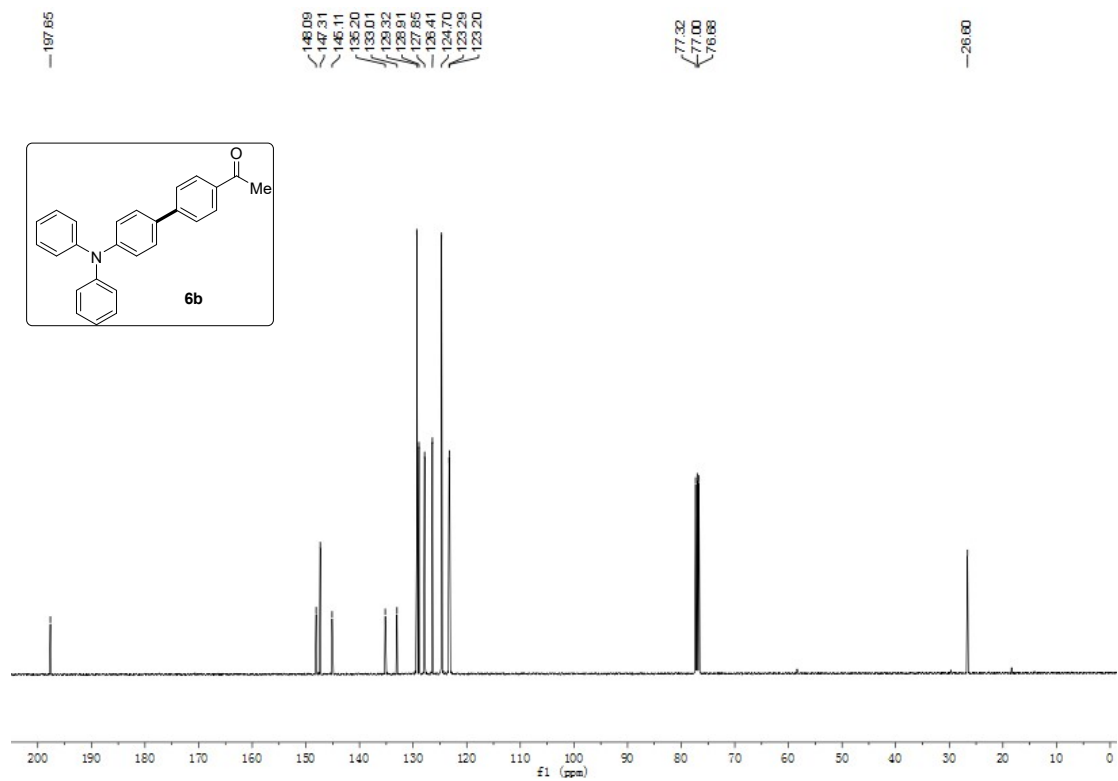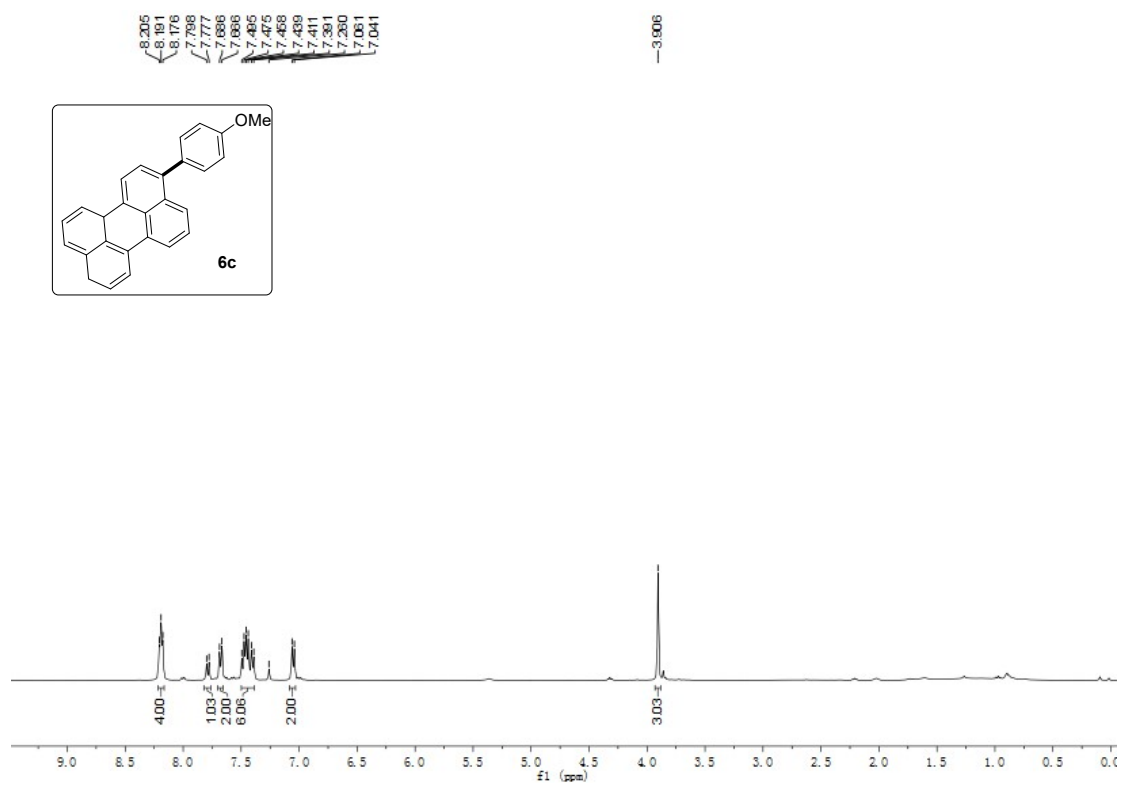



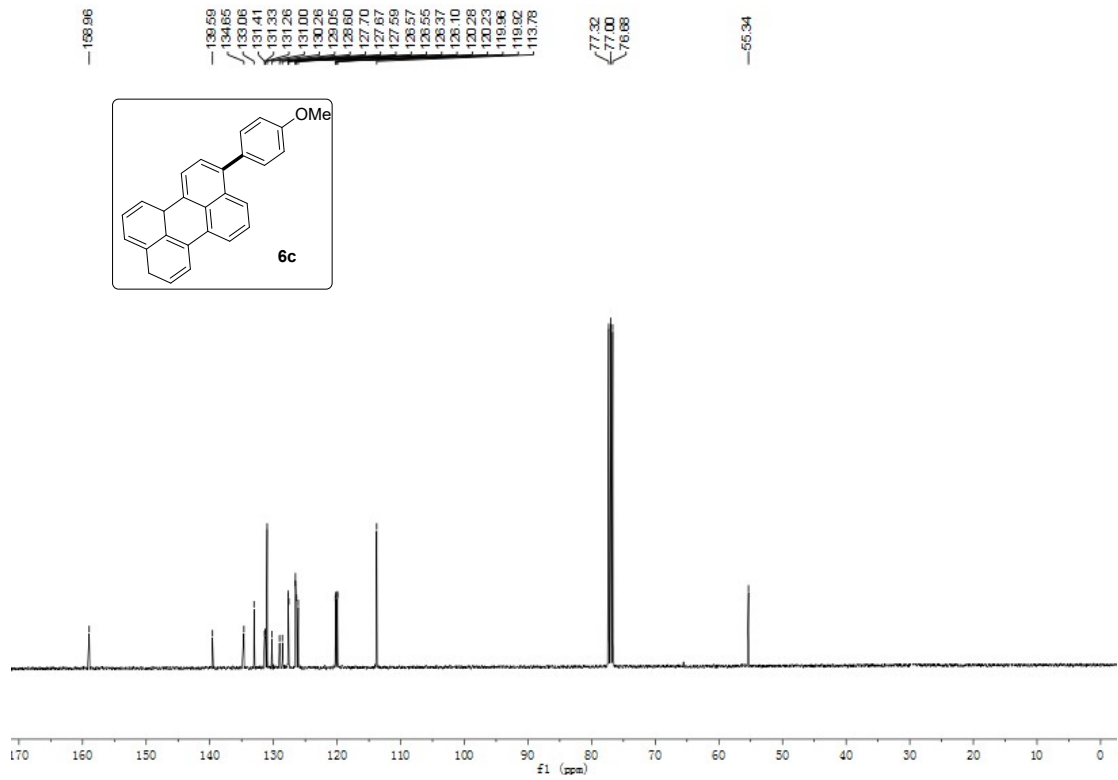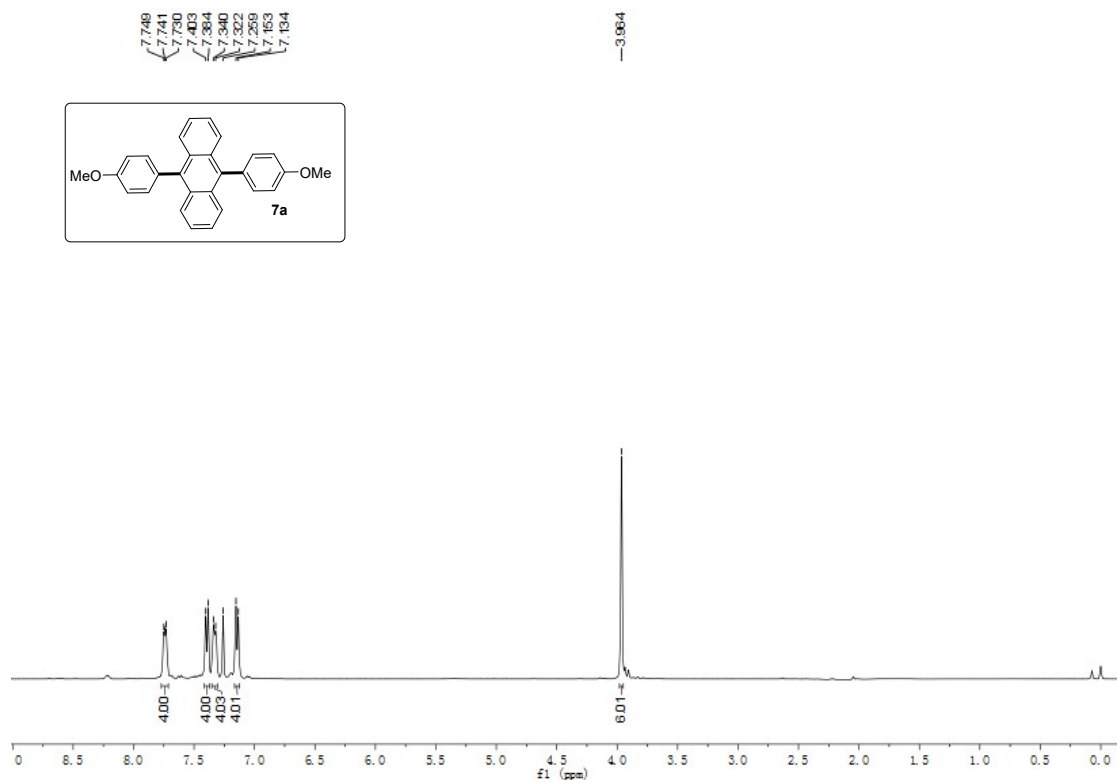

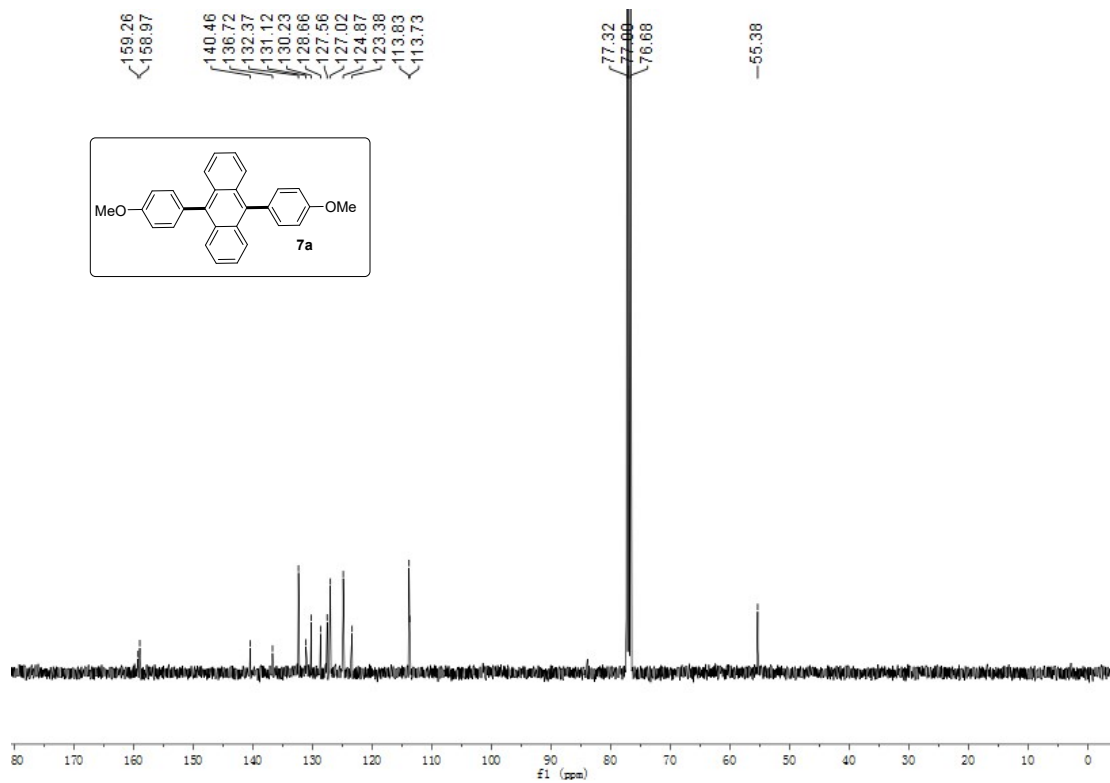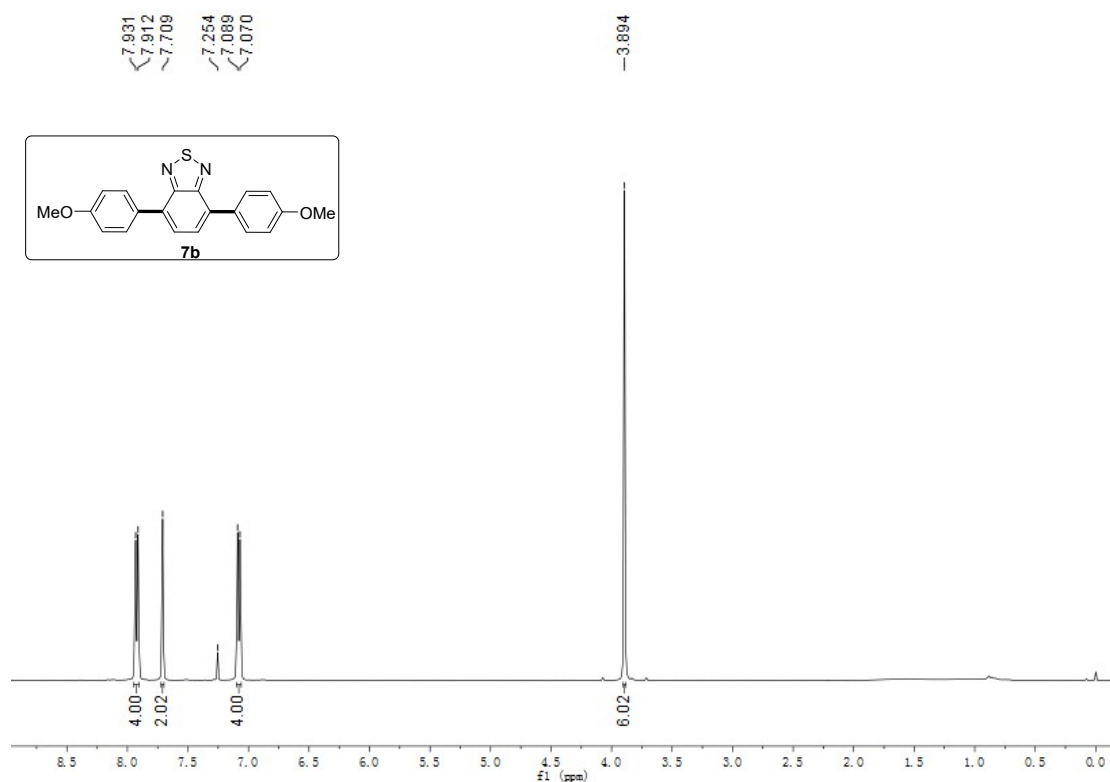

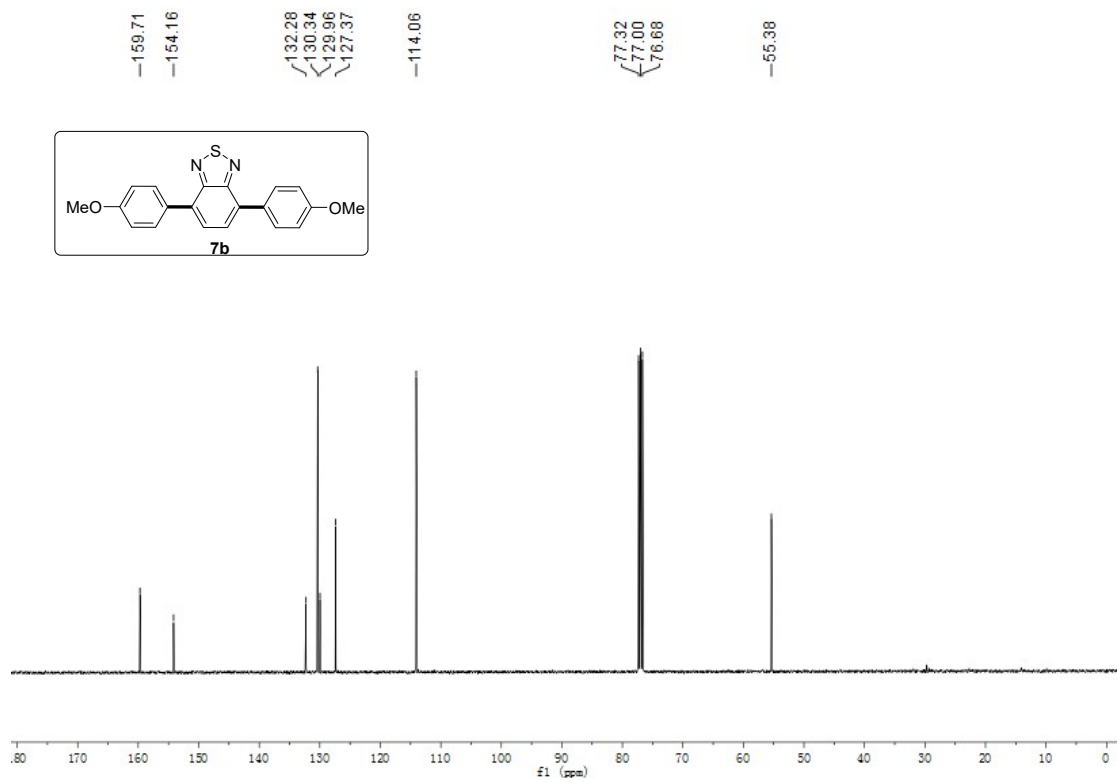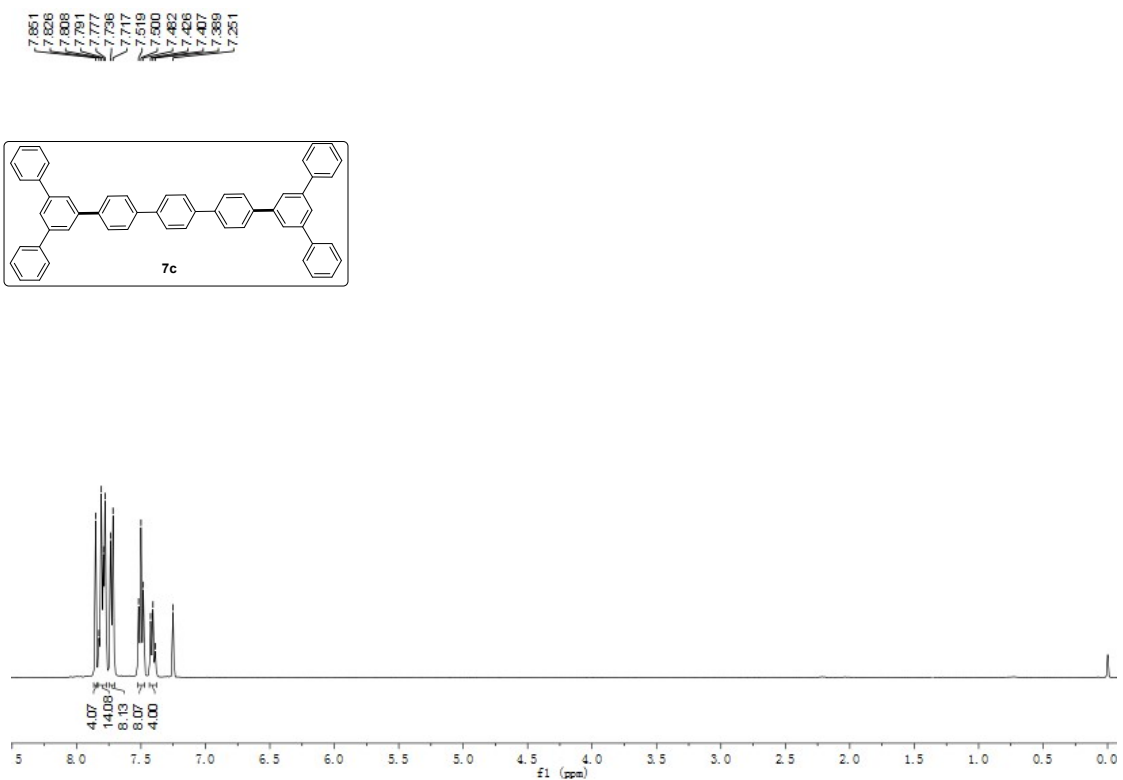

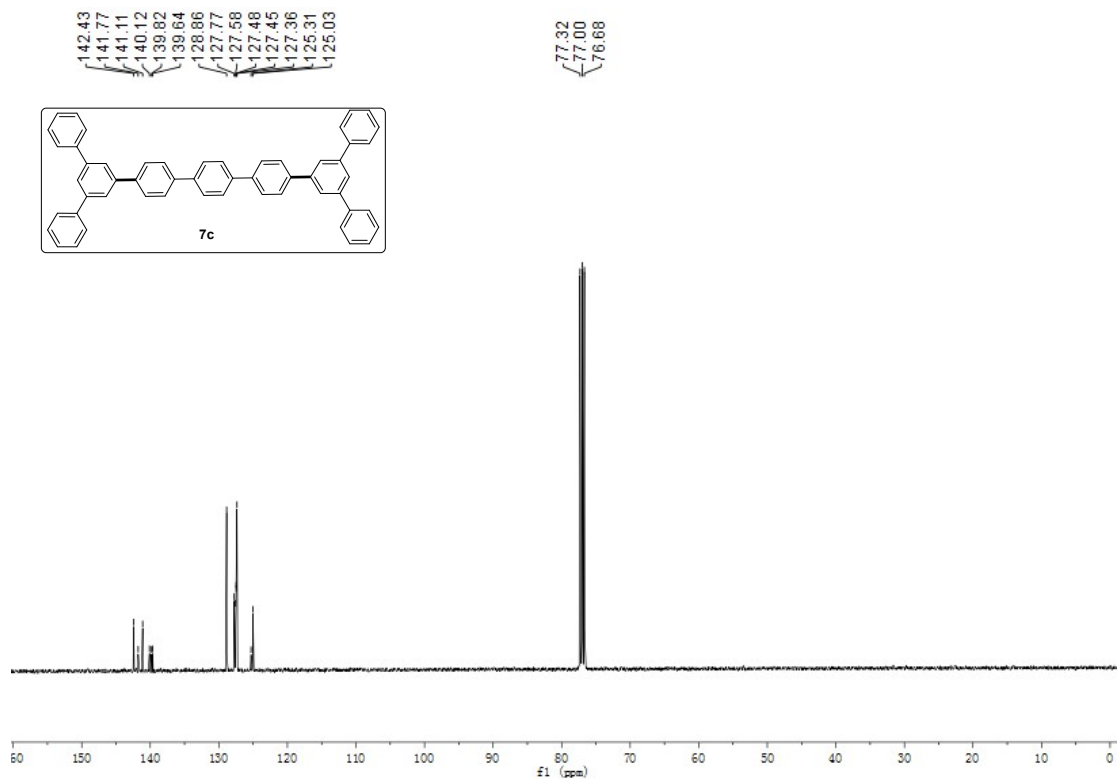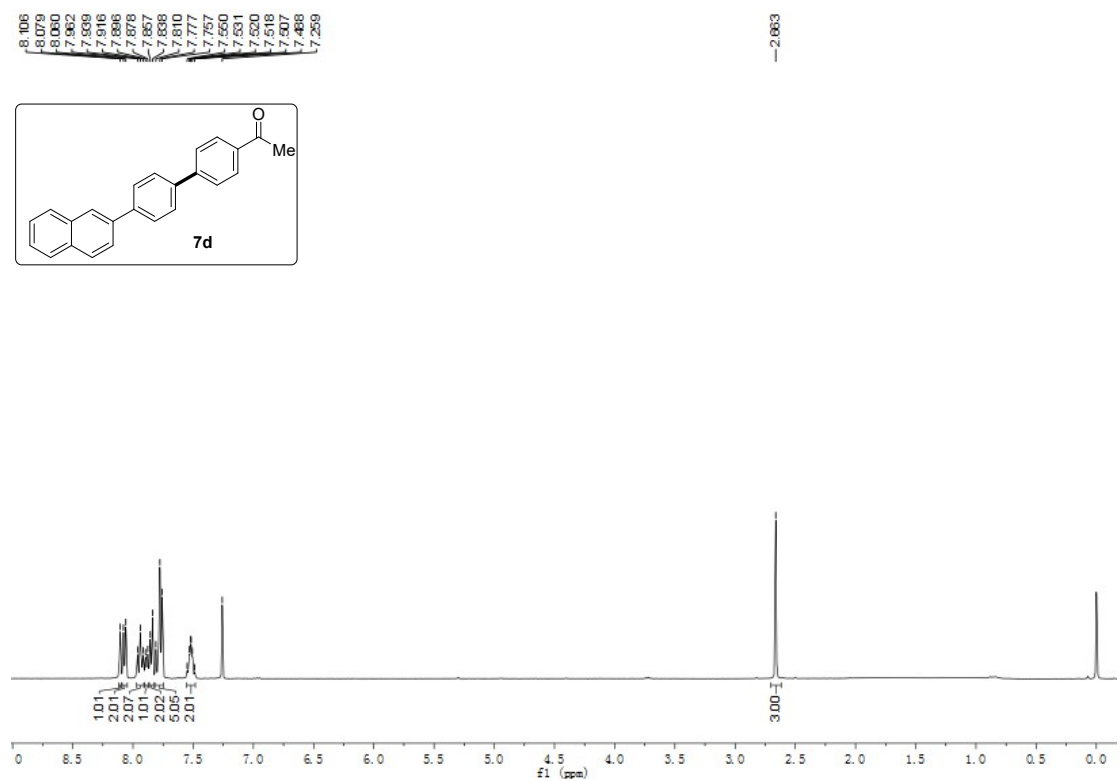

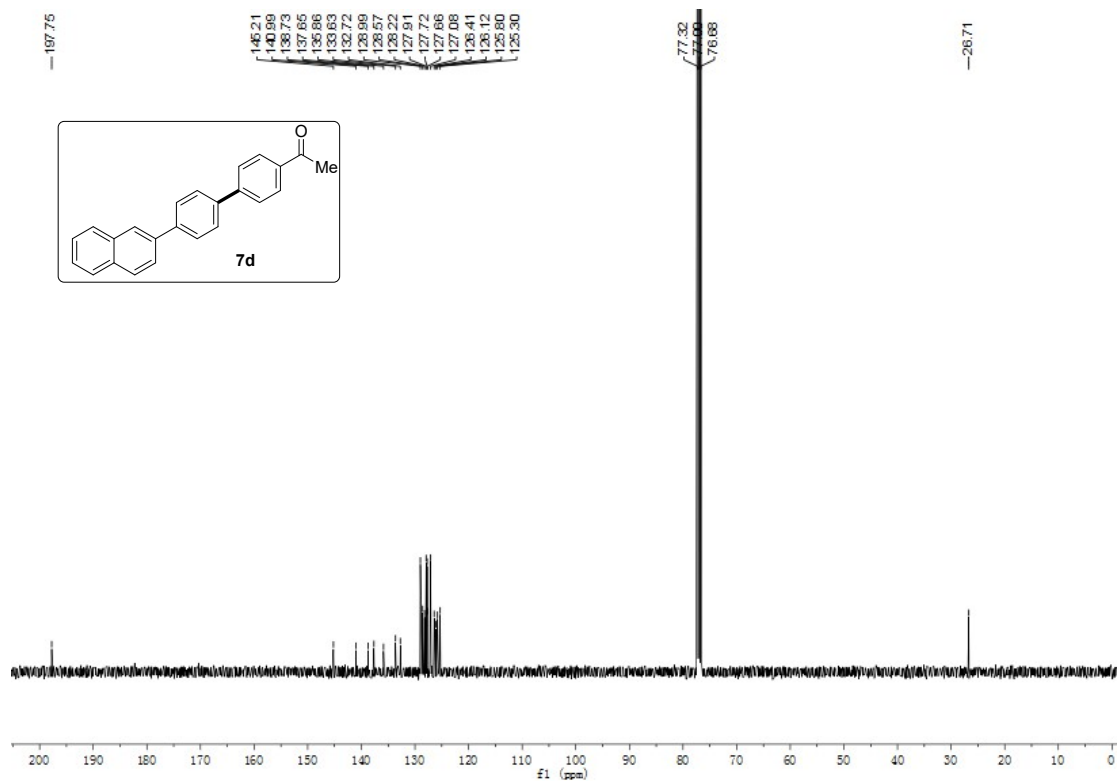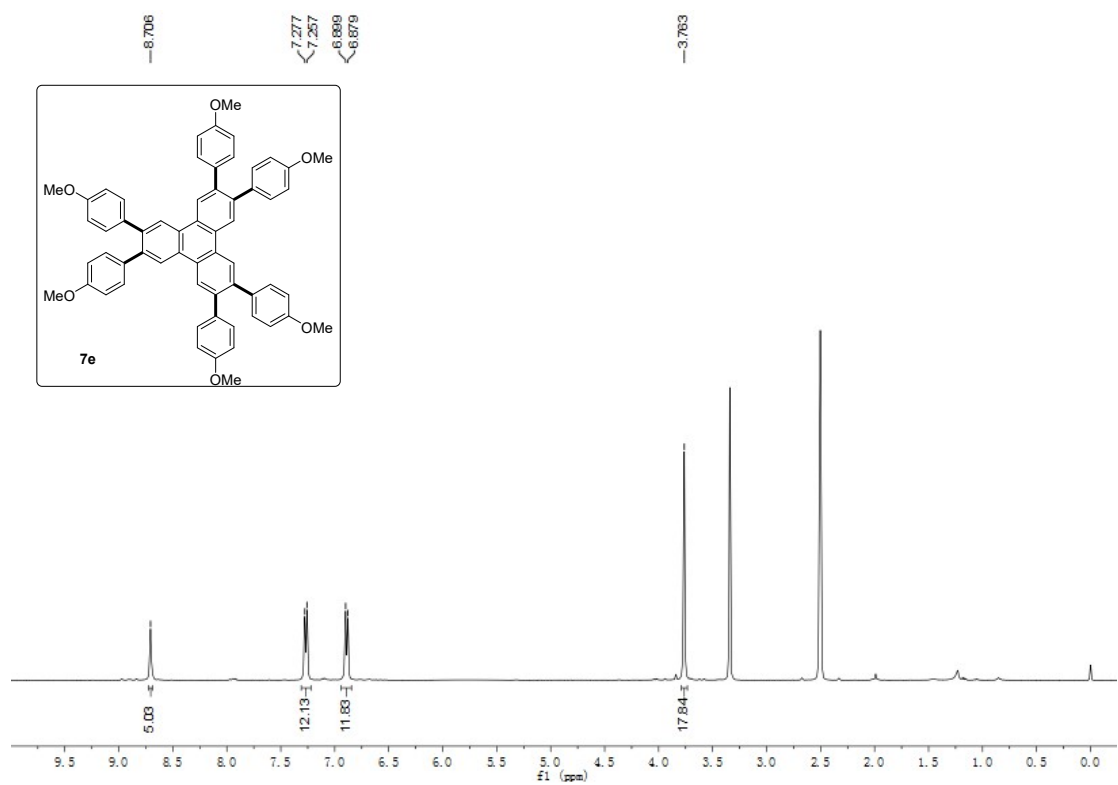

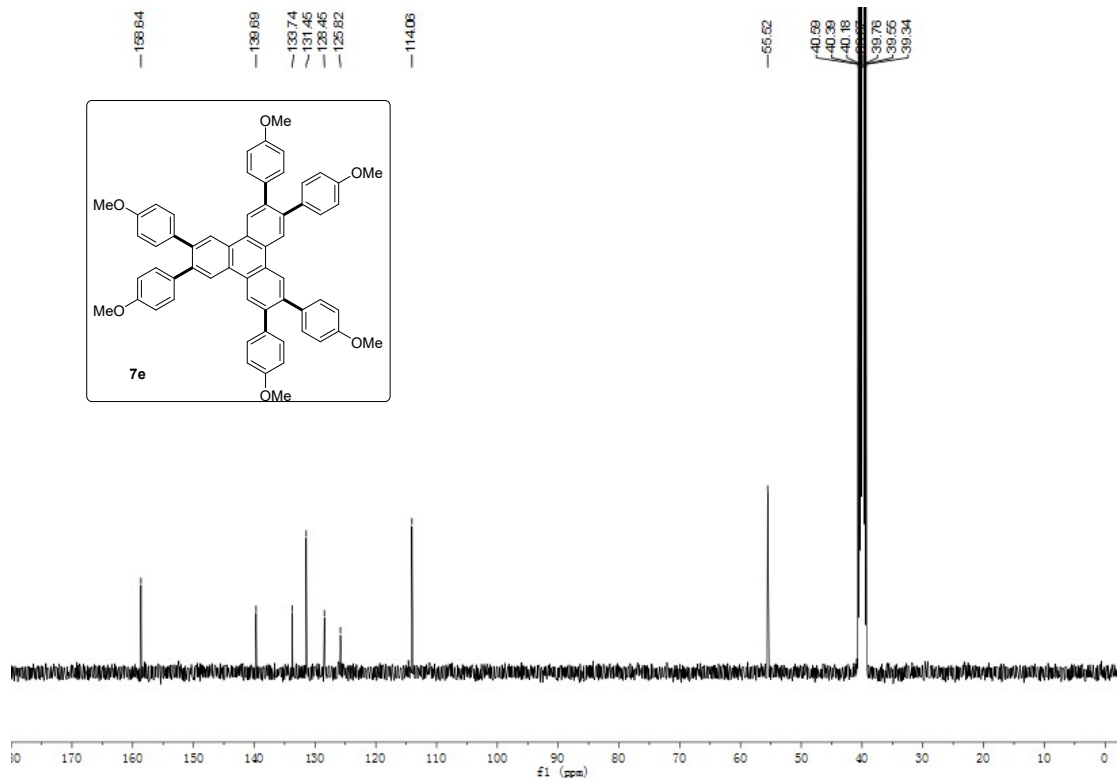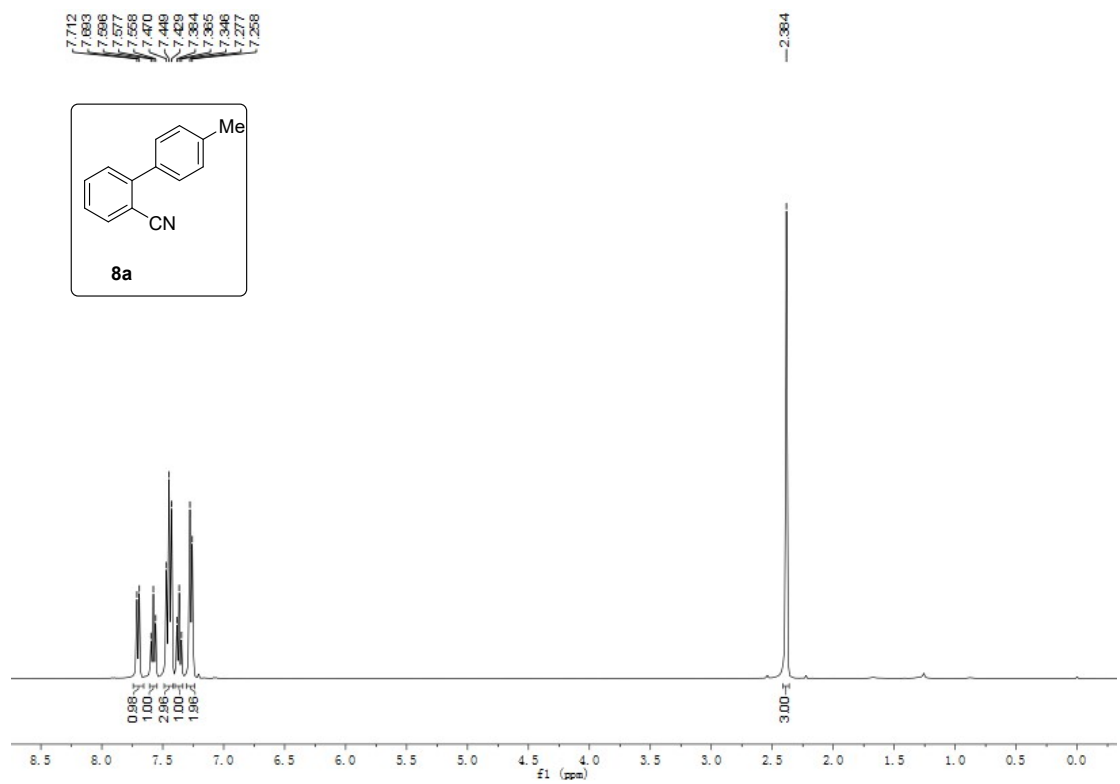

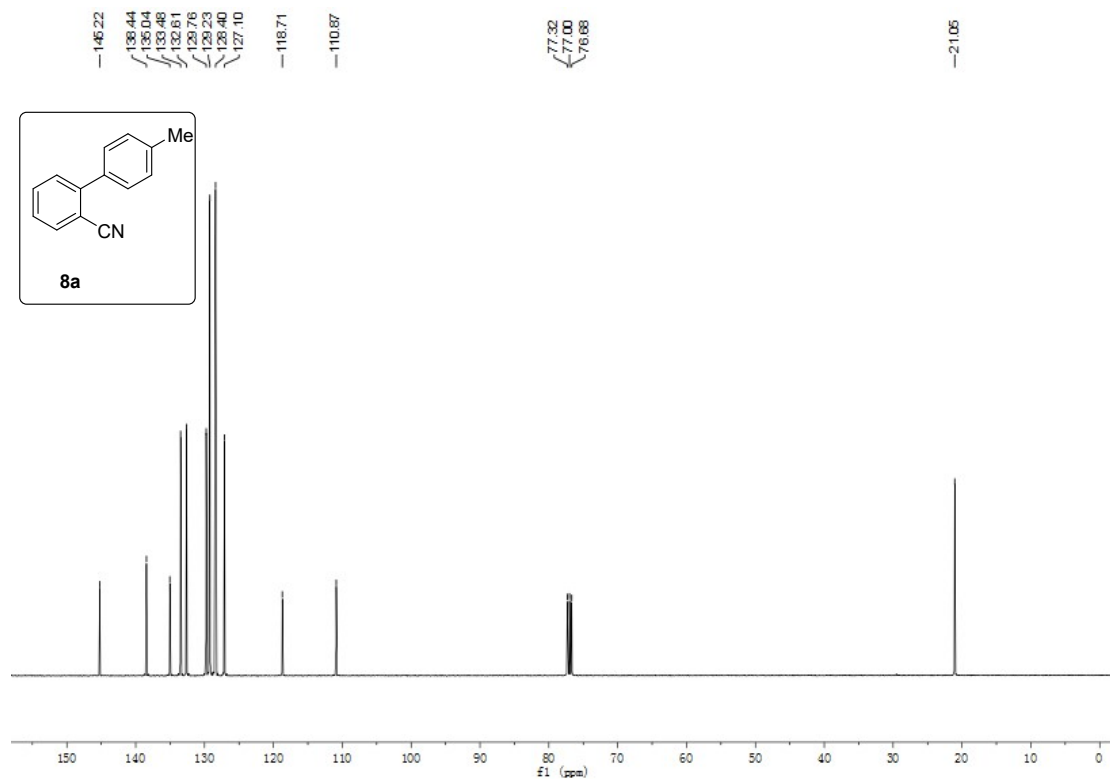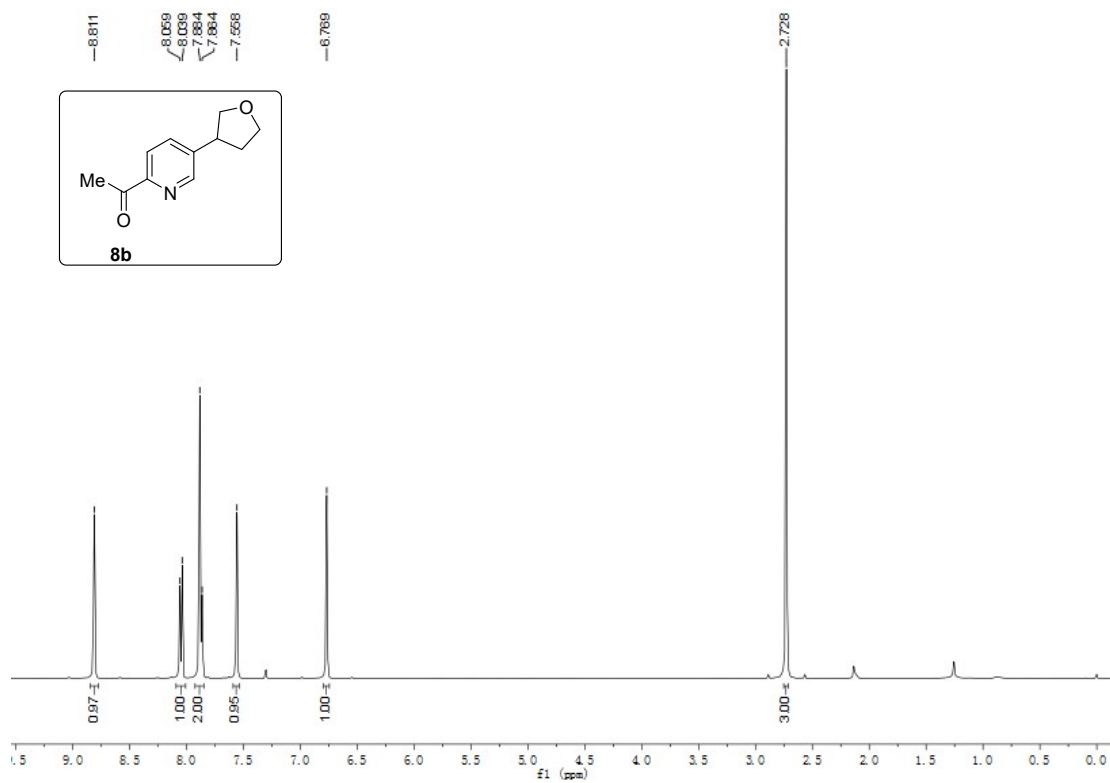

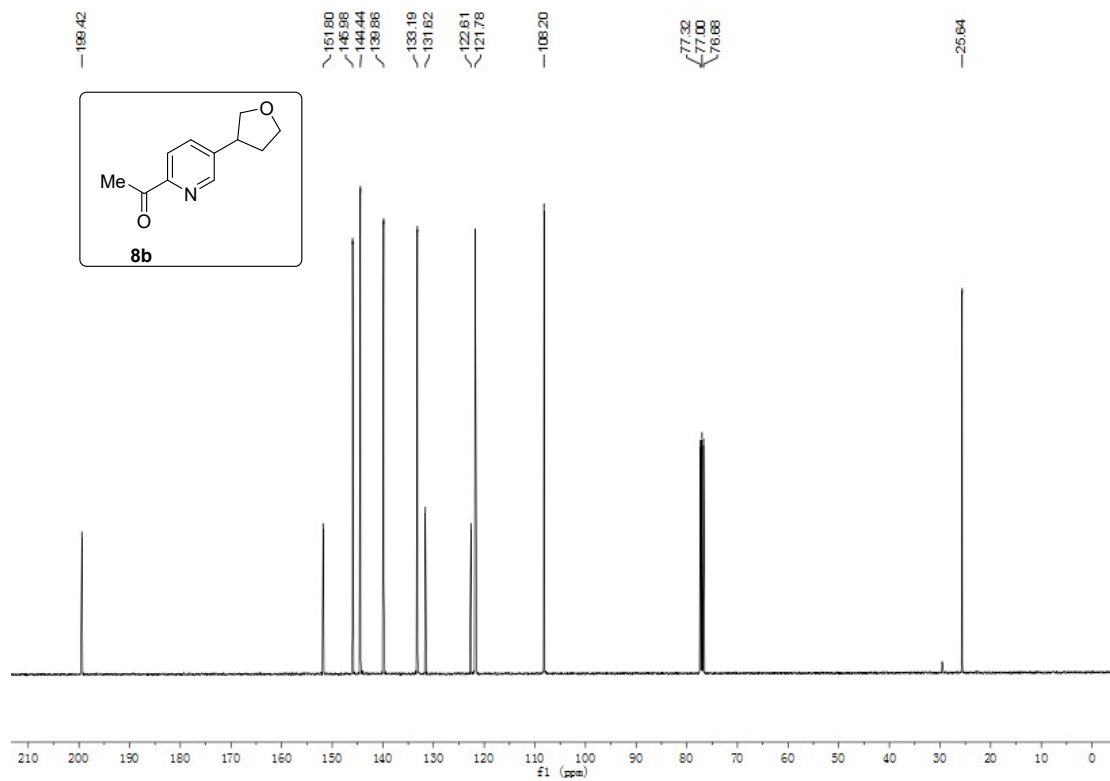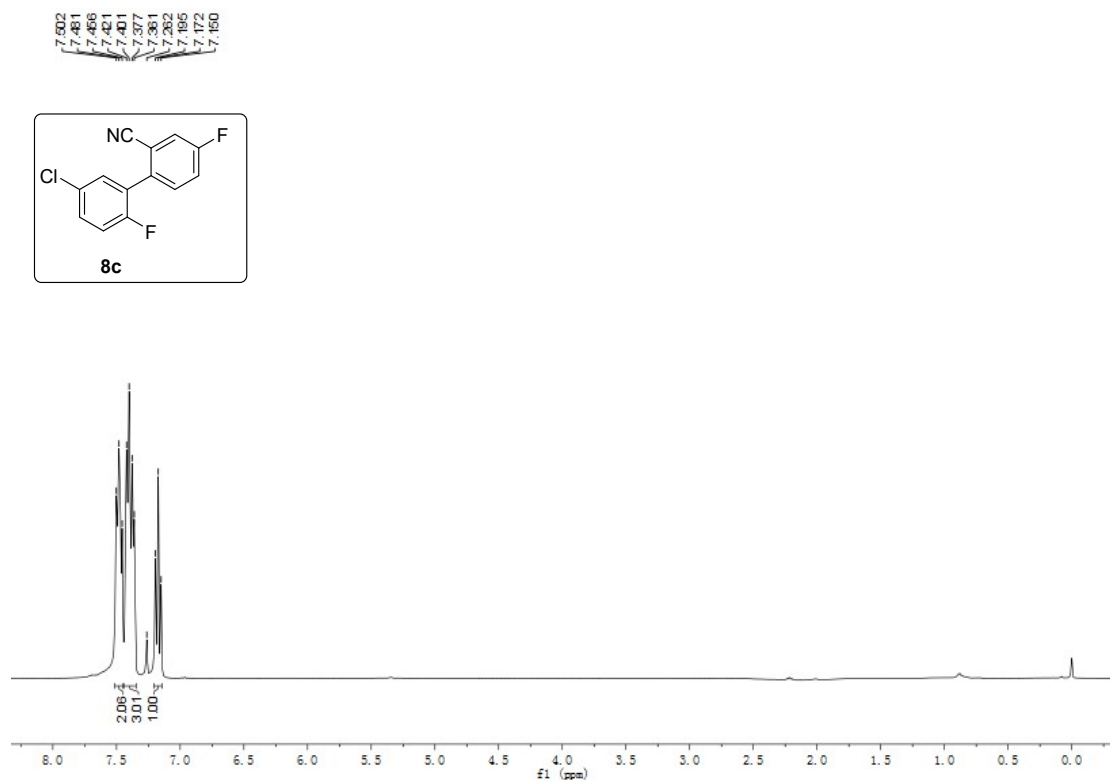



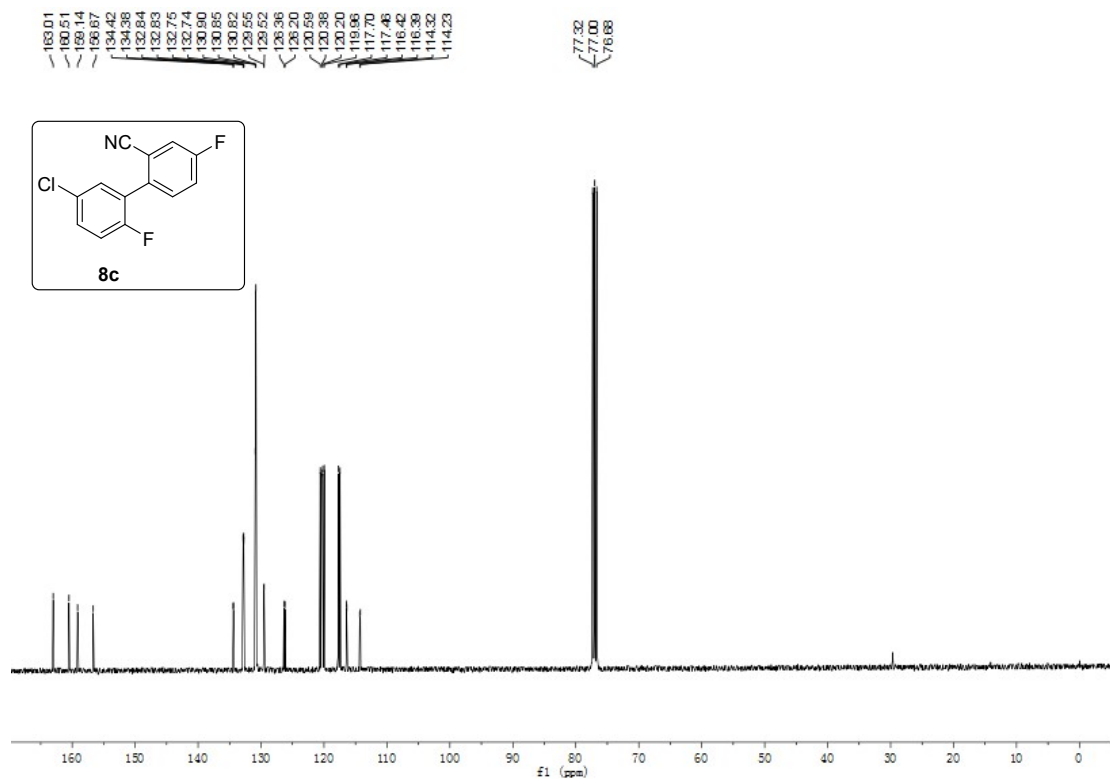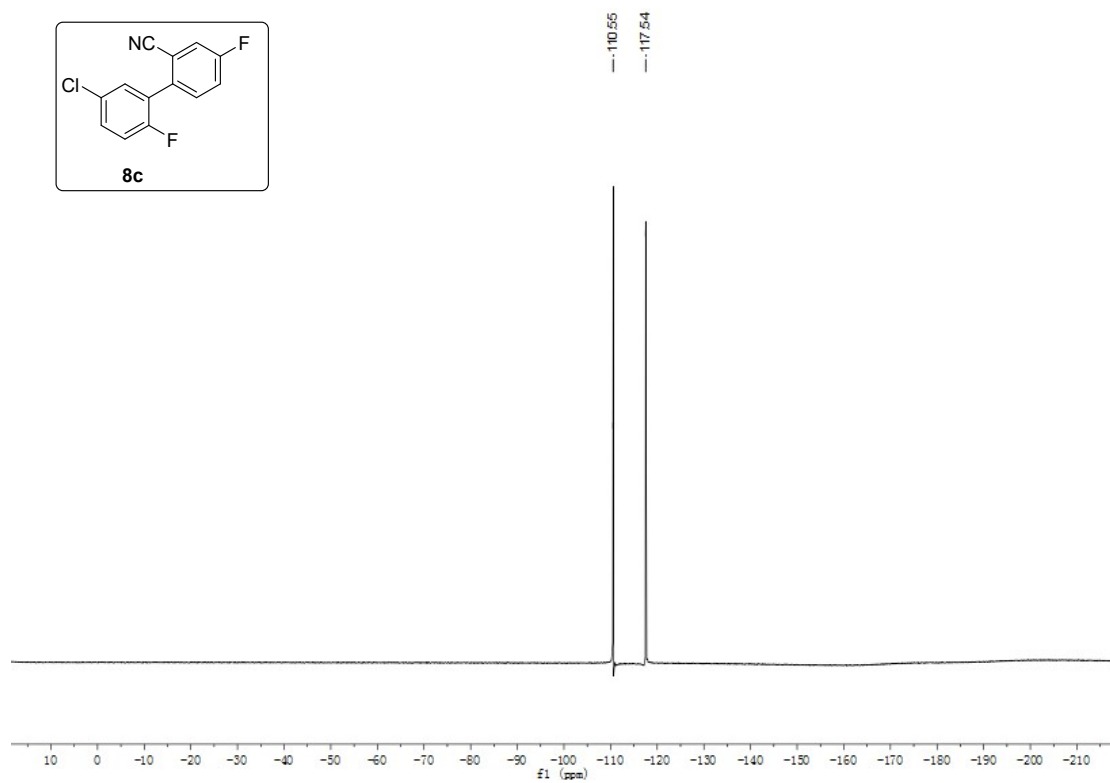

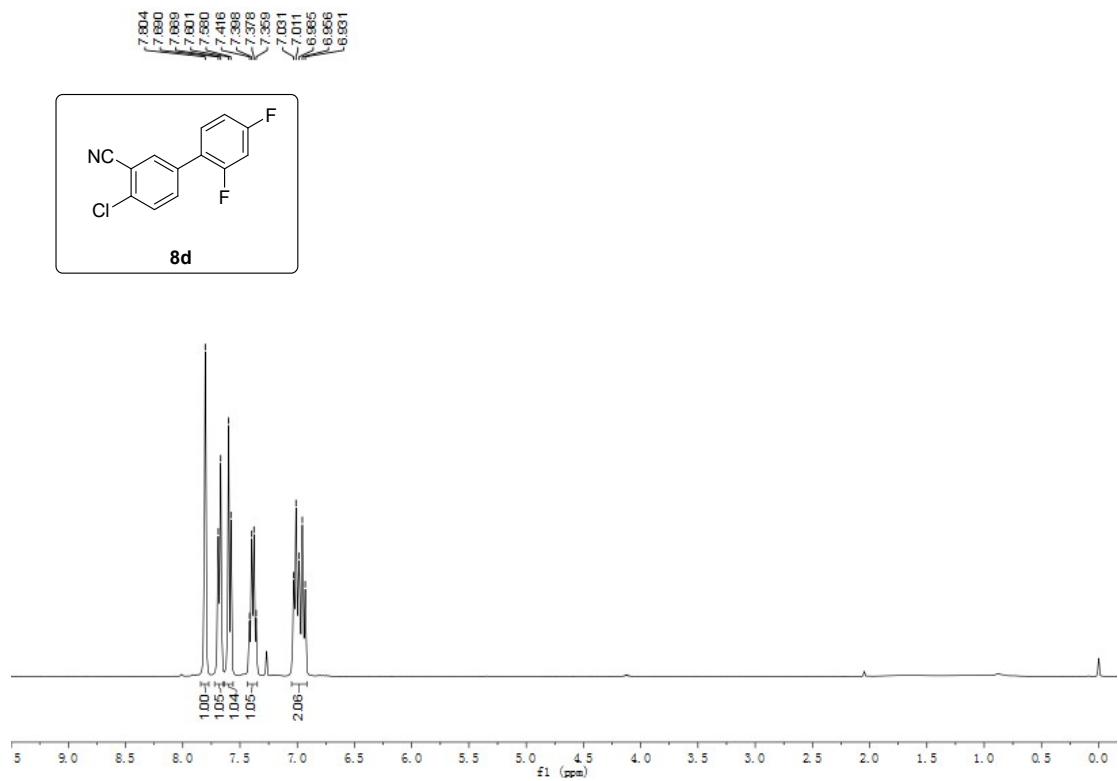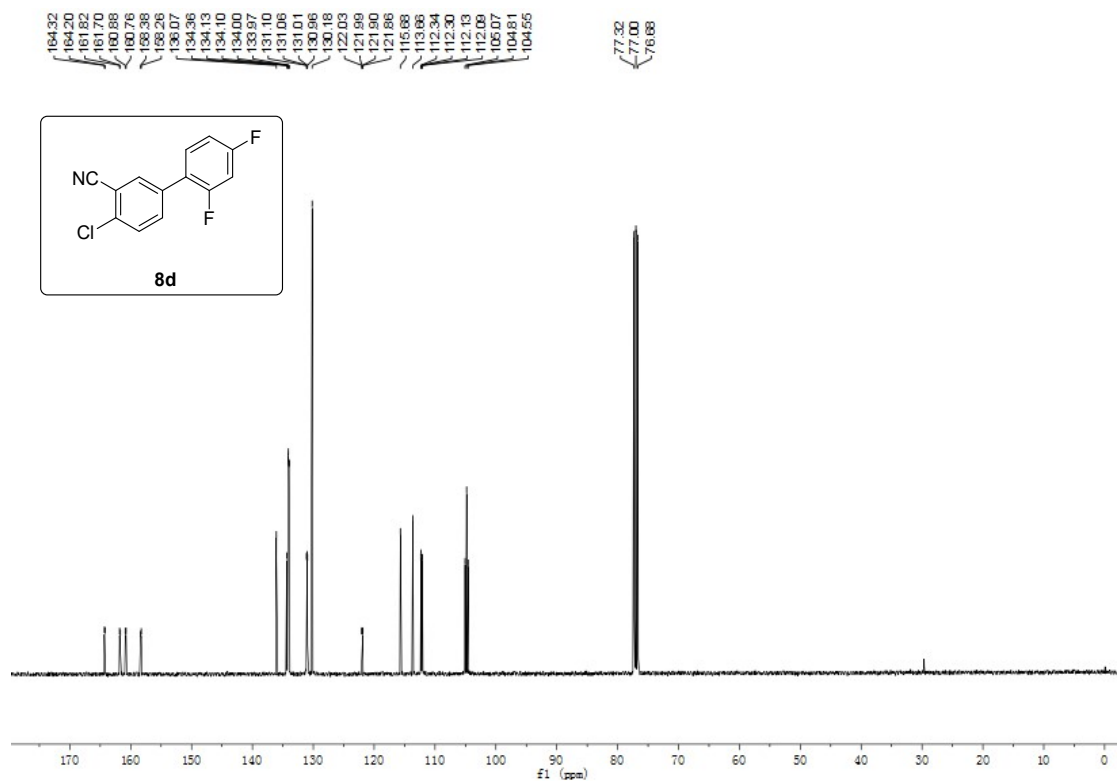

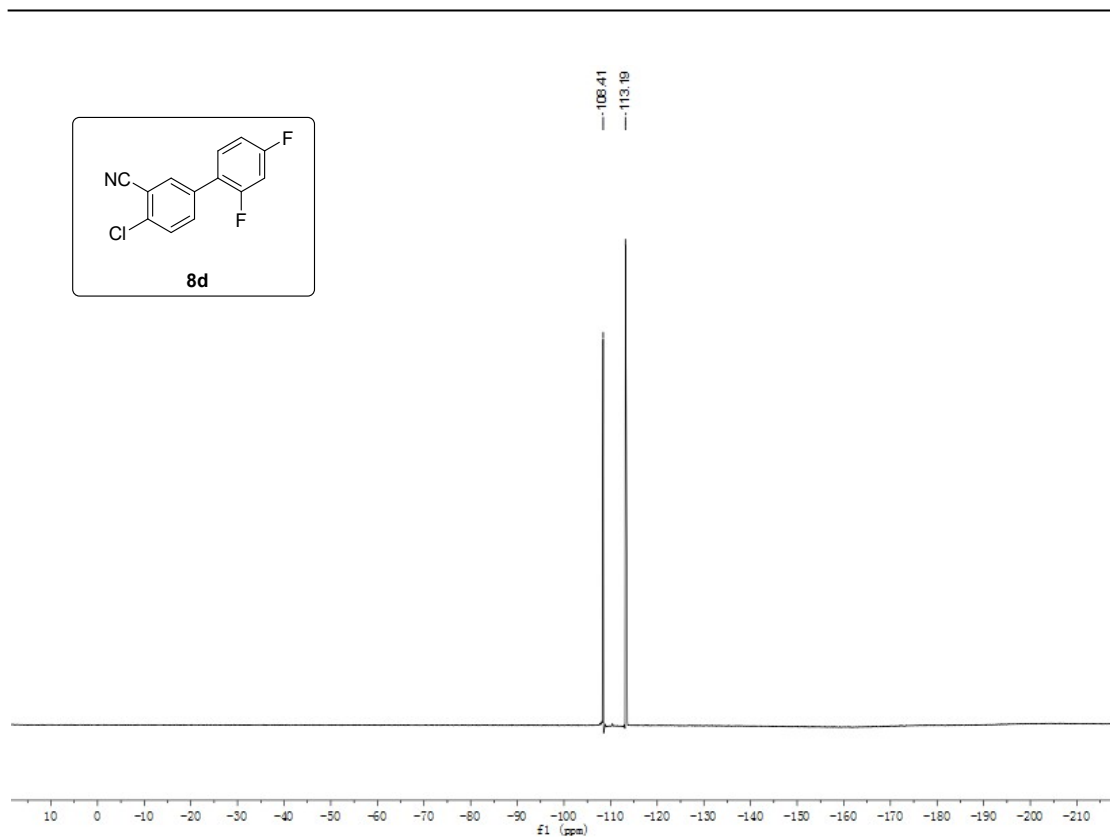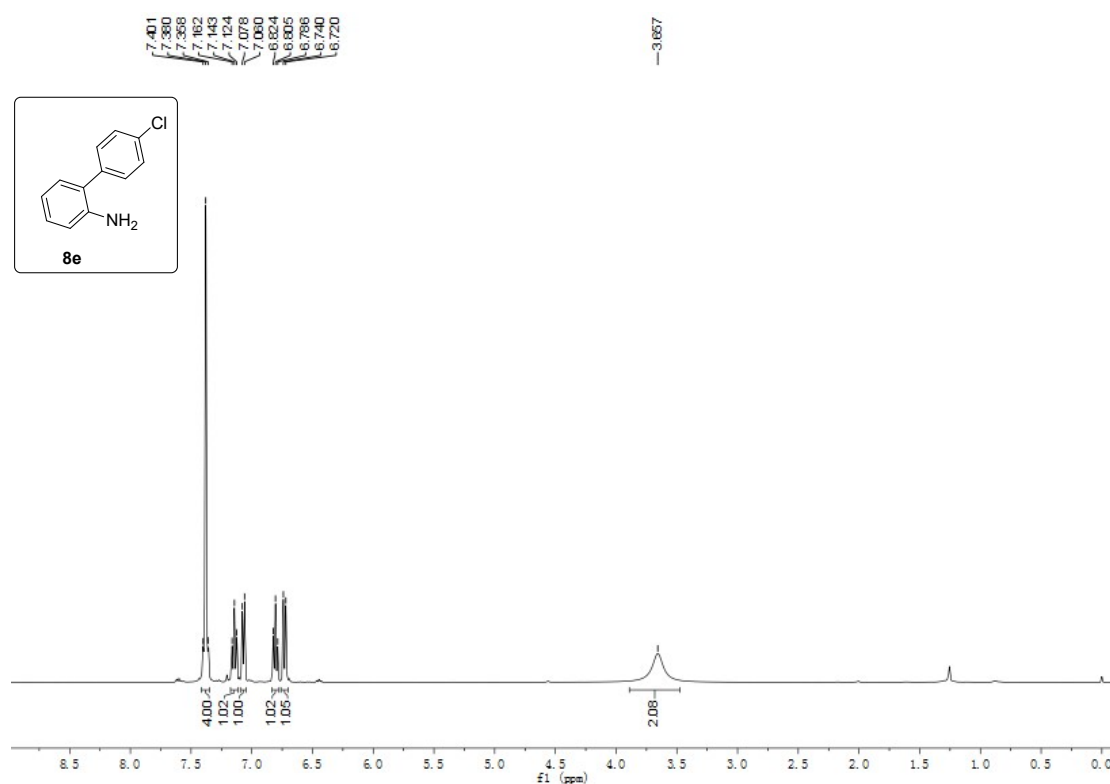

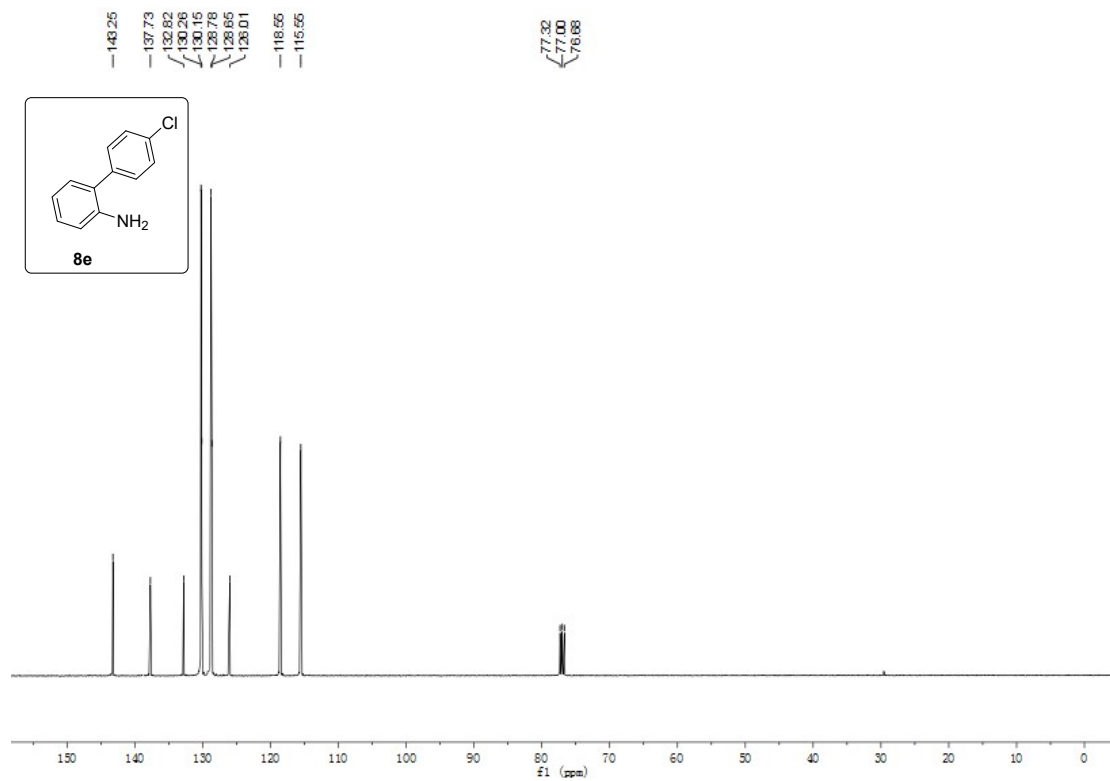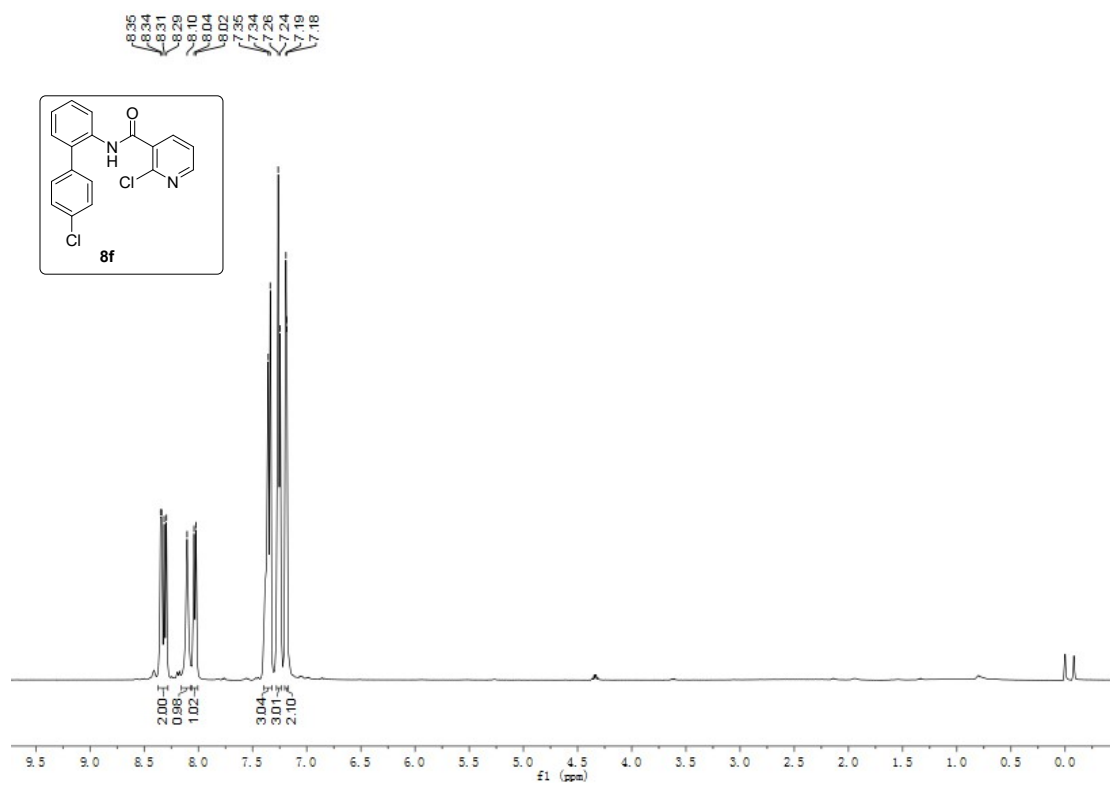

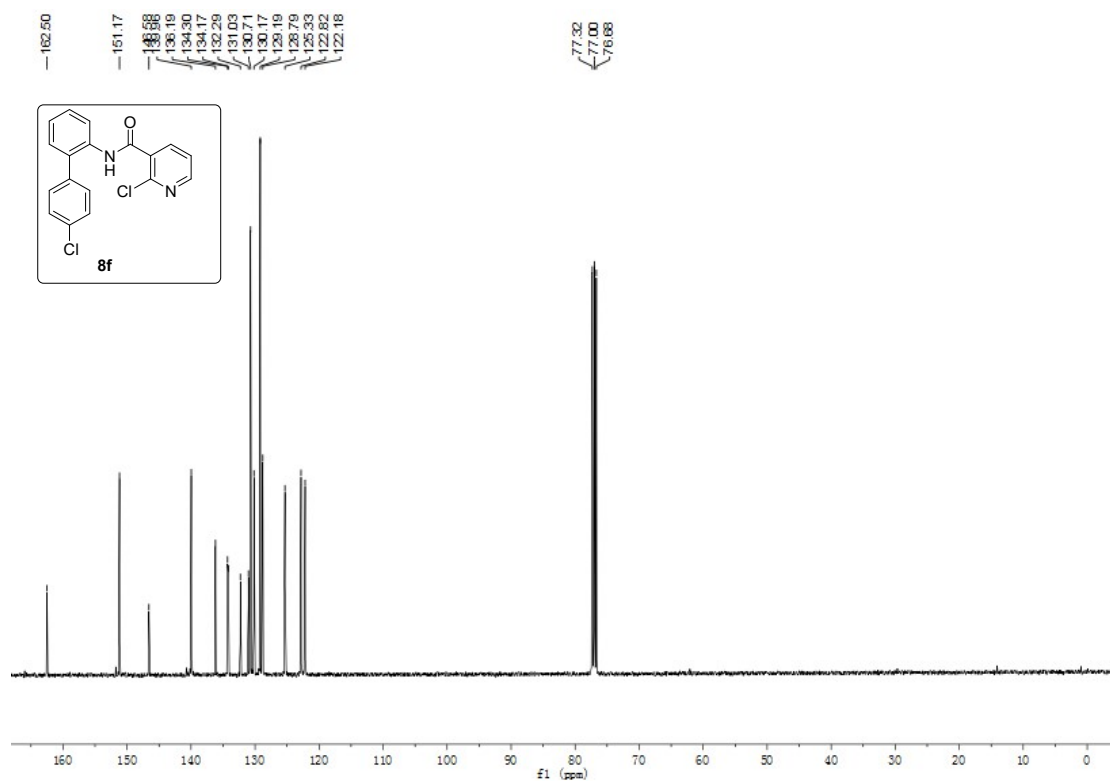

Supplement: d2gc01427k1.pdf [file d2gc01427k1.pdf]
